# Supplementary material for: Site‐Selective Modification of Proteins with Oxetanes
Source: PubMed Central journal article supplement (PMC5434895; doi:10.1002/chem.201700745), 2017-03-29
Supplement: CHEM-23-6483-s001.pdf [file CHEM-23-6483-s001.pdf]

# CHEMISTRY

## A **European** Journal

### Supporting Information

#### Site-Selective Modification of Proteins with Oxetanes

Omar Boutureira,<sup>\*[a, f]</sup> Nuria Martínez-Sáez,<sup>[a]</sup> Kevin M. Brindle,<sup>[c, d]</sup> André A. Neves,<sup>[c]</sup> Francisco Corzana,<sup>[a, e]</sup> and Gonçalo J. L. Bernardes<sup>\*[a, b]</sup>

chem\_201700745\_sm\_miscellaneous\_information.pdf

## Table of Contents

|                                                        |     |
|--------------------------------------------------------|-----|
| 1. General Remarks                                     | S2  |
| 2. Experimental Section                                | S6  |
| 2.1. Protein Modification                              | S6  |
| 2.2. LC–MS/MS Analysis                                 | S65 |
| 2.3. SDS Polyacrylamide Gel Electrophoresis (SDS-PAGE) | S66 |
| 2.4. <sup>1</sup> H-NMR Experiments                    | S67 |
| 2.5. Circular Dichroism (CD)                           | S70 |
| 2.6. Molecular Dynamics (MD) Simulations               | S70 |
| 2.7. Surface Plasmon Resonance (SPR)                   | S71 |
| 2.8. Bio-Layer Interferometry (BLI)                    | S72 |
| 3. References                                          | S73 |

## 1. General Remarks

Proton ( $^1\text{H-NMR}$ ) nuclear magnetic resonance spectra were recorded on a Bruker 400 MHz. Spectra were fully assigned using COSY, HSQC, HMBC and NOESY. All chemical shifts are quoted on the  $\delta$  scale in ppm using the residual solvent as internal standard. Coupling constants ( $J$ ) are reported in Hz with the following splitting abbreviations: s = singlet, d = doublet, t = triplet, q = quartet, quin = quintet and app = apparent. The results of these experiments were processed with MestreNova software. High-resolution mass spectra (HRMS) were recorded on a Waters ZQ LCMS using electrospray ionization (ESI) or on a Waters LCT Premier spectrometer. Nominal and exact  $m/z$  values are reported in Daltons. All solvents were used as supplied (Analytical or HPLC grade), without prior purification. Distilled water was used for chemical reactions and Milli-QR purified water for protein manipulations. All reagents were used as received from commercial suppliers. Solid-phase syntheses were carried out in peptide-synthesis reaction vessels (25 or 50 mL) with coarse porosity fritted glass support and Teflon stopcocks. Prep-scale reverse-phase chromatography was conducted with Agilent 1100 Series HPLC Value System (YMC-Pack Pro C18 column, 5  $\mu\text{m}$ , 250 mm  $\times$  10 mm). The eluent was acetonitrile (HPLC grade) with 0.1% trifluoroacetic acid (TFA) and Millipore water with 0.1% TFA.

### *Protein Mass Spectrometry*

Liquid chromatography-mass spectrometry (LC-MS) was performed on a Xevo G2-S TOF mass spectrometer coupled to an Acquity UPLC system (Acquity UPLC BEH300 C4 column, 1.7  $\mu\text{m}$ , 2.1 mm  $\times$  50 mm). Water with 0.1% formic acid (solvent A) and 70% acetonitrile and 29% water with 0.075% formic acid (solvent B), were used as the mobile phase at a flow rate of 0.2 mL  $\text{min}^{-1}$ . The gradient was programmed as follows: From 72% A to 100% B for 25 min then 100% B for 2 min and 72% A for 18 min. The electrospray source was operated with a capillary voltage of 2.0 kV and a cone voltage of 40 V. Nitrogen was used as the desolvation gas at a total flow of 850 L  $\text{h}^{-1}$ . Total mass spectra were reconstructed from the ion series using the MaxEnt algorithm preinstalled on MassLynx software (v. 4.1 from Waters) according to the manufacturer's instructions.

### *Protein LC–MS/MS analysis*

The protein sample was enzymatically digested by trypsin overnight. All LC–MS/MS experiments were performed using a nanoAcquity UPLC (Waters Corp., Milford, MA) system and an LTQ Orbitrap Velos hybrid ion trap mass spectrometer (Thermo Scientific, Waltham, MA). Separation of peptides was performed by reverse-phase chromatography using a Waters reverse-phase nano column (BEH C18, 1.7  $\mu\text{m}$ , 75  $\mu\text{m}$  x 250 mm) at flow rate of 300  $\text{nL min}^{-1}$ . Peptides were initially loaded onto a pre-column (Waters UPLC Trap Symmetry C18, 5  $\mu\text{m}$ , 180  $\mu\text{m}$  x 20 mm) from the nanoAcquity sample manager with 0.1% formic acid for 3 min at a flow rate of 10  $\mu\text{L min}^{-1}$ . After this period, the column valve was switched to allow the elution of peptides from the pre-column onto the analytical column. Solvent A was water + 0.1% formic acid and solvent B was acetonitrile + 0.1% formic acid. The linear gradient employed was 5–40% B in 60 min. The LC eluent was sprayed into the mass spectrometer by means of a New Objective nanospray source. All  $m/z$  values of eluting ions were measured in the Orbitrap Velos mass analyser, set at a resolution of 30000. Data dependent scans (Top 20) were employed to automatically isolate and generate fragment ions by collision-induced dissociation in the linear ion trap, resulting in the generation of MS/MS spectra. Ions with charge states of 2+ and above were selected for fragmentation. Post-run, the data was processed using Protein Discoverer (version 1.3., ThermoFisher Scientific). Briefly, all MS/MS data were converted to mgf files and these were submitted to the Mascot search algorithm (Matrix Science, London UK) and searched against a custom database containing the corresponding protein and applying variable modifications of oxidation (M), deamination (NQ) and a custom modification (C), using a peptide tolerance of 25 ppm (MS) and 0.8 Da (MS/MS). Peptide identifications were accepted if they could be established at greater than 95.0% probability.

### *SDS-PAGE gel electrophoresis*

SDS-PAGE gel electrophoresis was carried out using an XCell SureLock™ Mini-Cell Electrophoresis System from ThermoFisher Scientific (NuPAGE® Bis-Tris Mini Gels, NuPAGE® MES SDS running buffer). Protein molecular weights were approximated by comparison to a protein marker (Precision Plus Protein Standards 10–250 kDa from Bio-Rad). Briefly, a 10  $\mu\text{L}$  aliquot of the reaction mixture was desalted with a Zeba™ Spin desalting column (ThermoFisher Scientific) and 5  $\mu\text{L}$  of

this solution was transferred to a 0.5 eppendorf tube. NuPAGE<sup>®</sup> LDS sample buffer (4x, 2.5  $\mu$ L), NuPAGE<sup>®</sup> reducing agent (10x, 1  $\mu$ L), and H<sub>2</sub>O (1.5  $\mu$ L) were added. The solution was denatured at 70 °C for 10 min, loaded onto a 4–12% polyacrylamide NuPAGE<sup>®</sup> Bis-Tris mini gel, and then subjected to electrophoresis (200 V, 35 min) with 1x NuPAGE<sup>®</sup> MES SDS running buffer + NuPAGE<sup>®</sup> Antioxidant. Gels were visualised by coomassie staining (Instant Blue from Expedeon).

#### *Circular Dichroism (CD)*

CD measurements were performed on an Aviv Model 410 spectrometer, which was routinely calibrated with (*1S*)-(+)-10-camphorsulfonic acid. Spectra were recorded at 298K with a 0.1 cm quartz cell over the wavelength range 250–189 nm at 50 nm min<sup>-1</sup>, with a bandwidth of 1.0 nm, the response time of 1 s, resolution step width of 1 nm and sensitivity of 20–50 Mdeg. Each spectrum represents the average of 5 scans. CD spectra were converted from raw ellipticity ( $\theta$ , mdeg) to mean molar ellipticity per residue ( $[\theta]$ , deg cm<sup>2</sup> dmol<sup>-1</sup> residue<sup>-1</sup>).

#### *Molecular Dynamics (MD) Simulations*

MD simulations were performed using Amber12.<sup>[1]</sup> Parameters for the unnatural residues were generated by the *antechamber* module of Amber. A combination of ff14SB,<sup>[2]</sup> GLYCAM-06<sup>[3]</sup> (for the  $\beta$ GalS unit), and the general Amber force field (GAFF)<sup>[4]</sup> parameters were used to properly reproduce the conformational behaviour of the molecules. Partial charges were set to fit the electrostatic potential generated with HF/6-31G(d) by RESP.<sup>[5]</sup> The charges were calculated according to the Merz-Singh-Kollman scheme using Gaussian 09.<sup>[6]</sup> Each glycoprotein was immersed in a box with a 10 Å buffer of TIP3P<sup>[7]</sup> water molecules and neutralized by adding explicit counter ions (Na<sup>+</sup>). A two-stage geometry optimization approach was used. The first stage minimizes only the positions of solvent molecules and ions, and the second stage is an unrestrained minimization of all the atoms in the simulation cell. The systems were then gently heated by incrementing the temperature from 0 to 300 K under a constant pressure of 1 atm and periodic boundary conditions. Harmonic restraints of 30 kcal/mol were applied to the solute, and the Andersen temperature coupling scheme<sup>[8]</sup> was used to control and equalize the temperature. The time step was kept at 1 fs during the heating stages. Long-range electrostatic effects were modelled using the particle-Mesh-Ewald method.<sup>[9]</sup> An 8-Å cut-off was applied to

Lennard-Jones and electrostatic interactions. Each system was equilibrated for 2 ns with a 2-fs time step at a constant volume and temperature of 300 K. Production trajectories were then run for additional 100 ns under the same simulation conditions.

#### *Surface Plasmon Resonance (SPR)*

Kinetic data analysis was performed using Biacore T100 Evaluation 1.1.1 software. Concentration ranges [0–135] nM. Materials, methods, and analysis were described previously.<sup>[10]</sup>

#### *Biotinylation of Antibodies*

Starting, modified **13**, and recovered Trastuzumab were conjugated to a biotin linker using Biotin-(PEG)<sub>4</sub>-NHS (ThermoFisher Scientific) in order to carry out BLI experiments using Streptavidin (SA) Biosensors. A solution of EZ-Link NHS-(PEG)<sub>4</sub>-Biotin (20 μL, 200 μM in PBS) was added to the corresponding protein (20 μL, 20 μM in PBS) and was left at room temperature for 30 min. The crude reaction mixture was buffer exchanged with PBS for 3 times to remove the excess of NHS-(PEG)<sub>4</sub>-Biotin, obtaining a biotin-to-antibody ratio around 1.6.

#### *Bio-Layer Interferometry (BLI)*

Binding assays were performed on an Octet Red Instrument (fortéBIO). Ligand immobilization, binding reactions, regeneration and washes were conducted in wells of black polypropylene 96-well microplates. Starting, modified **13**, and recovered Trastuzumab (20 nM) were immobilized on Streptavidin (SA) Biosensors in PBS with 0.1% BSA and 0.02% tween at 30 °C. Binding analysis were carried out at 25 °C, 1000 rpm in PBS with 0.1% BSA and 0.02% tween, with a 600 s of association followed by a 2200 s of dissociation, using different concentrations of recombinant HER2 receptor to obtain the association curve [0–200 nM]. Glycine pH 2.0 was used as a regeneration buffer. Data were analyzed using Data Analysis (fortéBIO), with Savitzky-Golay filtering. Binding was fitted to a 2:1 Heterogeneous ligand model, steady state analysis were performed to obtain the binding kinetics constants ( $K_D$ ).

## 2. Experimental Section

### 2.1. Protein Modification

#### C2A Domain of Synaptotagmin-I (C2Am)<sup>[10]</sup>

##### Sequence of C2Am S95C (modified residue highlighted)

GSPGISGGGGGILDSMVEKLGKLGKLDYDFQNNQLLVGIIQAAELPALDMG  
GTSDPYVKVFLLPDKKKKFETKVHRKTLNPFVNEQFTFKVPYCELGGKTLVM  
AVYD FDRFSKHDII GEFKVPMTV DFGHVTEEWR DLQSAEK

Calculated average isotopic mass = 16222.53 Da (*N*-terminal Met cleaved)

A typical analysis of a conjugation reaction by LC-ESI-MS is described below. The total ion chromatogram, combined ion series, and deconvoluted spectra are shown for C2Am S95C. Identical analyses were carried out for all the conjugation reactions performed in this work.

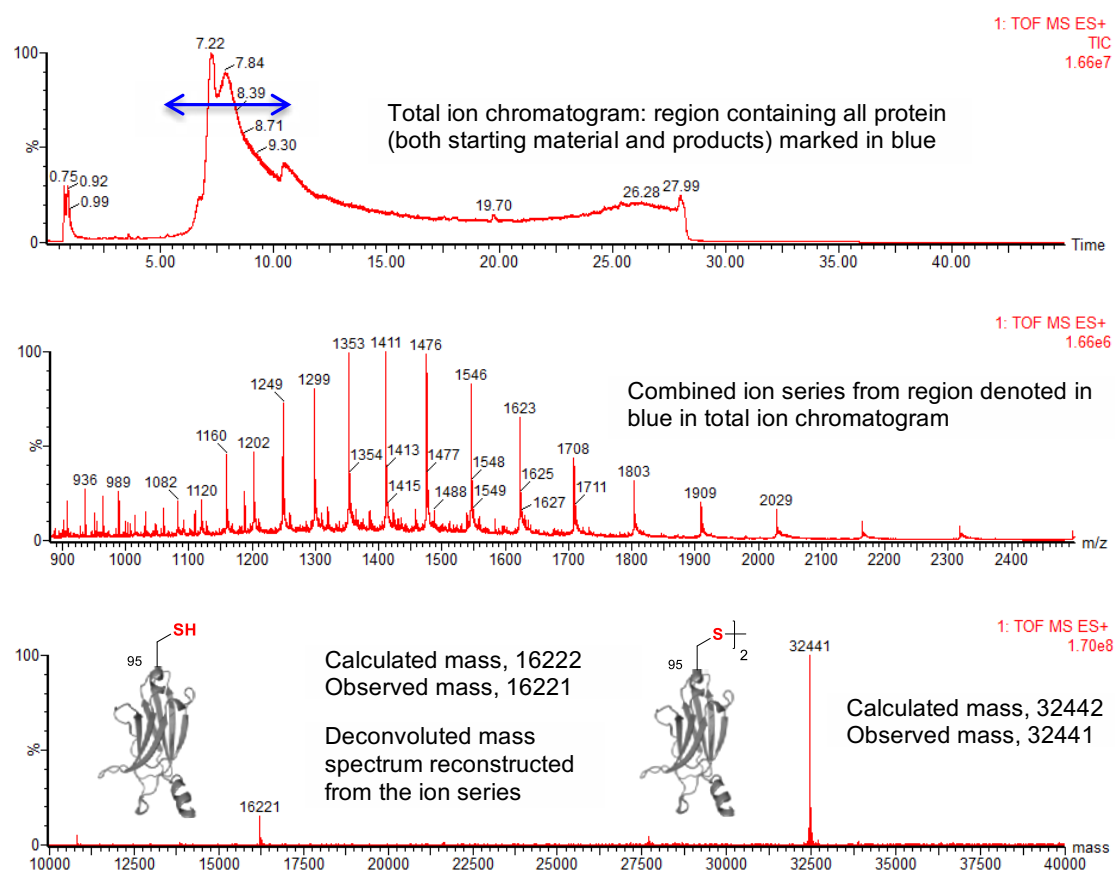

Figure S1. ESI-MS spectrum of non-reduced C2Am

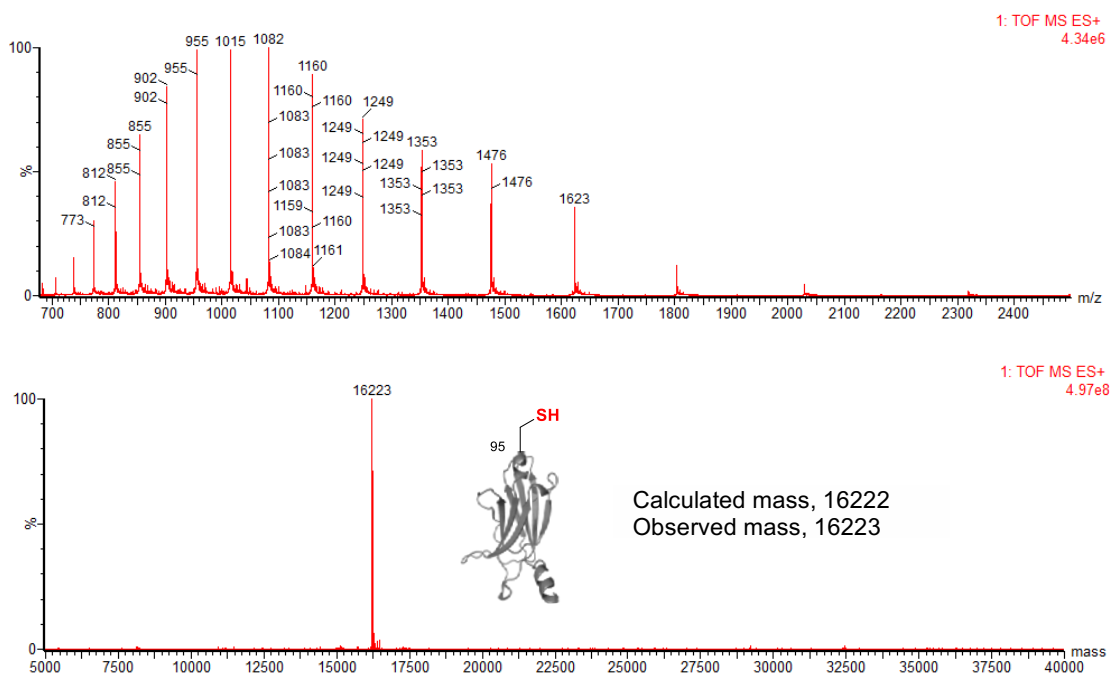

**Figure S2.** ESI-MS of reduced C2Am (with TCEP·HCl)

### Control: reaction of C2Am with Ellman's reagent

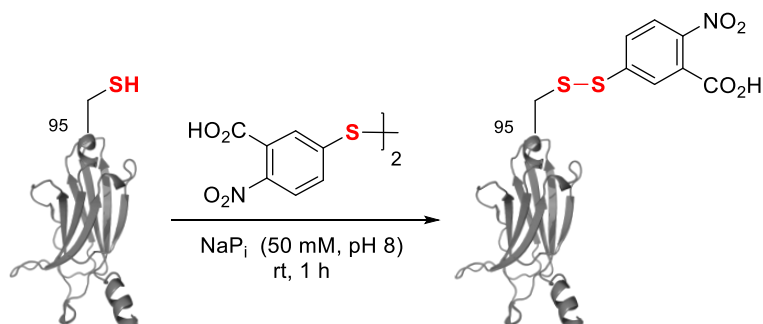

All manipulations were carried out at room temperature. Tris(2-carboxyethyl)phosphine hydrochloride (TCEP·HCl) (10  $\mu$ L of a 1 mg/mL stock solution in H<sub>2</sub>O, 308.2 nmol) was added to a solution of C2Am (50  $\mu$ L, 1 mg/mL, 3.08 nmol) in 50 mM sodium phosphate buffer at pH 8 and the resulting mixture shaken for 2 h. Small molecules were removed from the reaction mixture by loading the sample onto a Zeba™ Spin desalting column (ThermoFisher Scientific) previously equilibrated with 50 mM sodium phosphate buffer at pH 8. The sample was eluted by centrifugation (2 min, 1500xg). A 10  $\mu$ L aliquot of C2Am (*ca.* 1 mg/mL, 0.616 nmol) was transferred to a 0.5 mL eppendorf tube. Ellman's reagent (0.3  $\mu$ L of a 20 mg/mL stock solution in H<sub>2</sub>O, 15.14 nmol) was added and the resulting mixture vortexed for 30 seconds. After 1 h of additional shaking, a 3  $\mu$ L aliquot was analyzed by LC-MS (3  $\mu$ L aliquot diluted by 7  $\mu$ L of 50 mM sodium



phosphate buffer at pH 8) and complete conversion to the expected Ellman's product (calculated mass, 16419; observed mass, 16419) was observed.

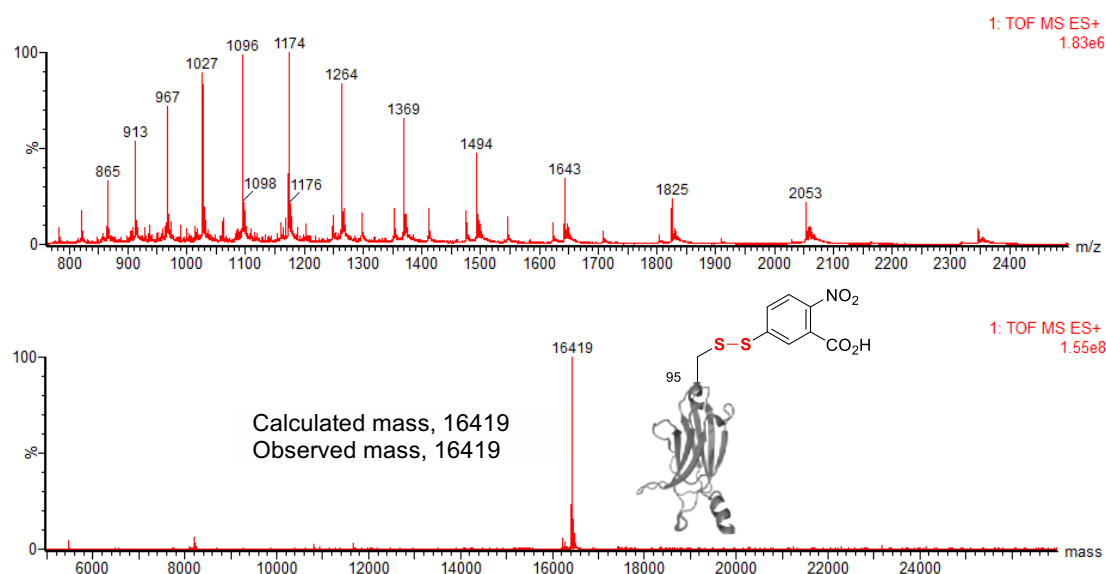

**Figure S3.** ESI-MS of the reaction of C2Am with Ellman's reagent

### Reaction of C2Am with 3-bromooxetane (**1**)

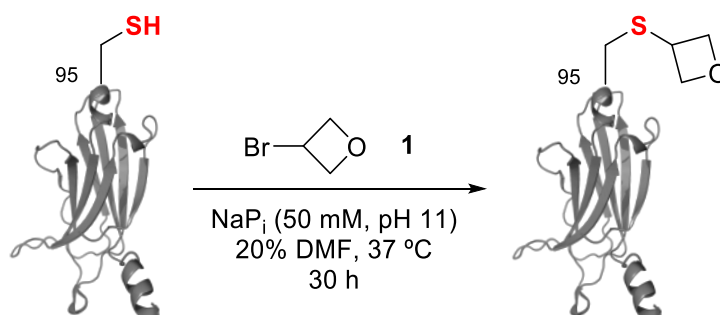

Tris(2-carboxyethyl)phosphine hydrochloride (TCEP·HCl) (0.12 mg, 416.1 nmol) was added to a solution of C2Am (540  $\mu$ L, 0.25 mg/mL, 8.32 nmol) in 50 mM sodium phosphate buffer at pH 11 and the resulting mixture shaken at room temperature for 2 h. 3-Bromooxetane (**1**) (3.6  $\mu$ L, 41.6  $\mu$ mol) in DMF (135  $\mu$ L) was added and the resulting mixture vortexed for 30 seconds. After 30 h of additional shaking at 37  $^{\circ}$ C, a 3  $\mu$ L aliquot was analyzed by LC-MS (3  $\mu$ L aliquot diluted by 7  $\mu$ L of 50 mM sodium phosphate buffer at pH 11) and complete conversion to C2Am-3-S-Ox (**2**) (calculated mass, 16278; observed mass, 16279) was observed. Small molecules were removed from the reaction mixture by loading the sample onto a Zeba<sup>TM</sup> Spin desalting column (ThermoFisher Scientific) previously equilibrated with PBS buffer at pH 7.6. The sample was eluted by centrifugation (2 min, 1500xg) and concentrated

on a Vivaspin™ membrane concentrator (10 kDa molecular weight cut off). The protein sample (2.77 mg/mL by Bradford assay) was flash frozen with liquid nitrogen and stored at  $-20\text{ }^{\circ}\text{C}$ .

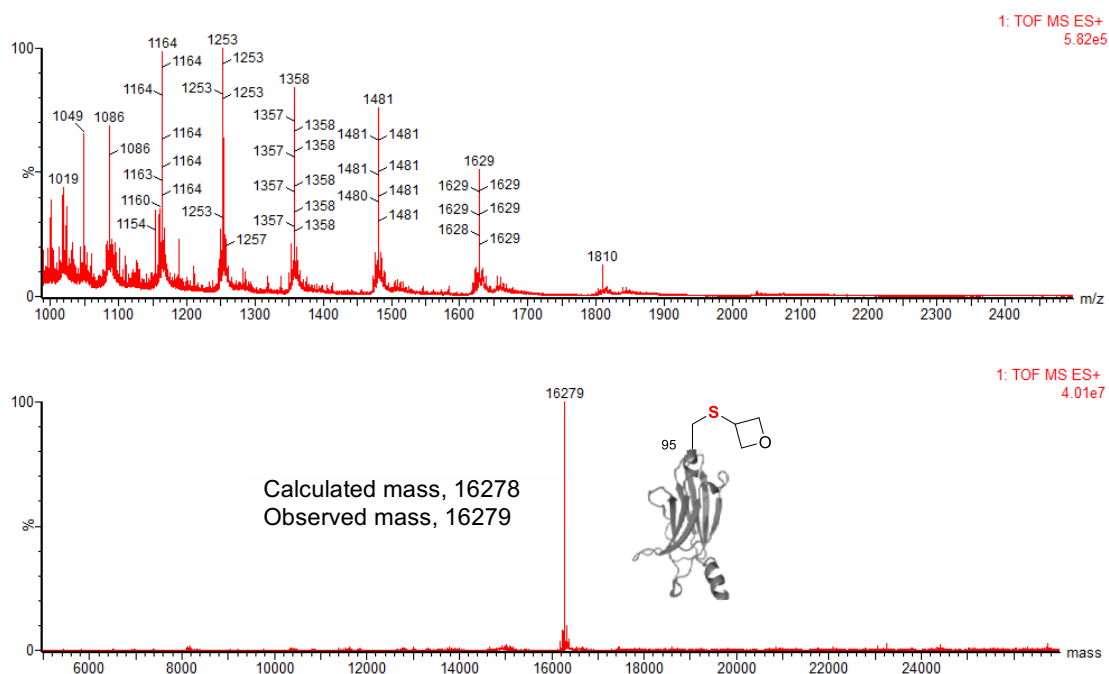

**Figure S4.** ESI-MS of the reaction of C2Am with 3-bromooxetane (**1**)

**Control: incubation of C2Am-3-S-Ox (**2**) with Ellman's reagent**

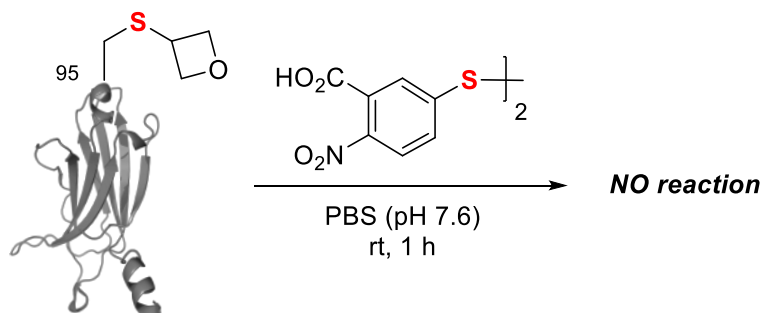

All manipulations were carried out at room temperature. A  $10\text{ }\mu\text{L}$  aliquot of C2Am-3-S-Ox (**2**) (*ca.*  $1\text{ mg/mL}$ ,  $0.614\text{ nmol}$ ) in PBS buffer at pH 7.6 was transferred to a  $0.5\text{ mL}$  eppendorf tube. Ellman's reagent ( $0.3\text{ }\mu\text{L}$  of a  $20\text{ mg/mL}$  stock solution in  $\text{H}_2\text{O}$ ,  $15.14\text{ nmol}$ ) was added and the resulting mixture vortexed for 30 seconds. After 1 h of additional shaking, a  $3\text{ }\mu\text{L}$  aliquot was analyzed by LC-MS ( $3\text{ }\mu\text{L}$  aliquot diluted by  $7\text{ }\mu\text{L}$  of PBS buffer at pH 7.6) and starting protein (**2**) (calculated mass, 16278; observed mass, 16279) was detected unaltered.

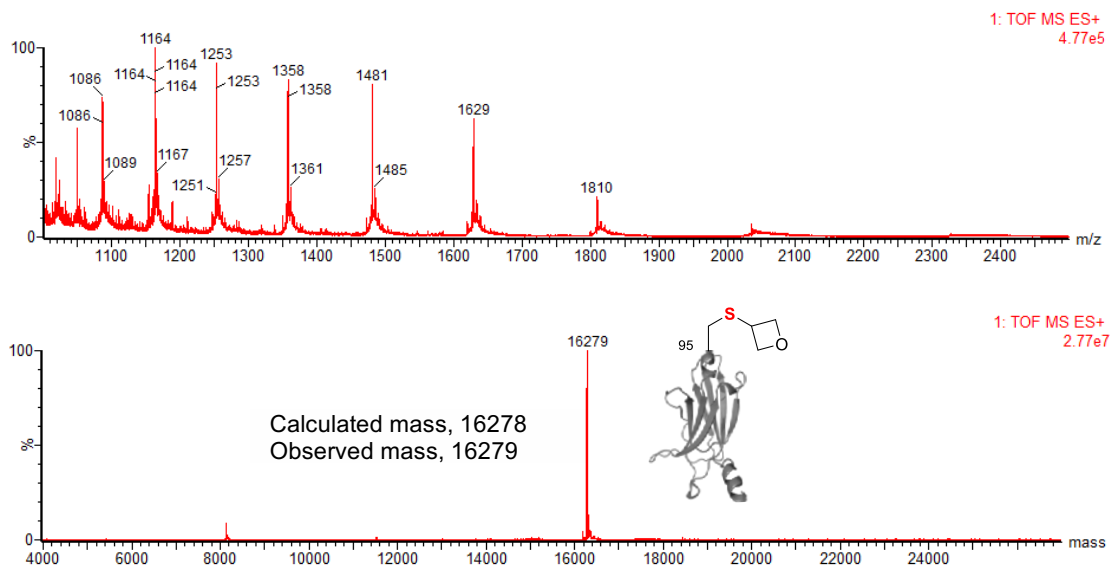

**Figure S5.** ESI-MS of the incubation of C2Am-3-S-Ox (**2**) with Ellman's reagent

### Stability of C2Am-3-S-Ox (**2**) in human plasma

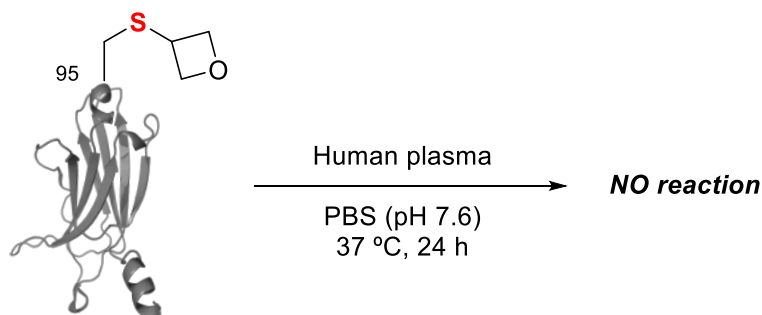

A 10  $\mu\text{L}$  aliquot of C2Am-3-S-Ox (**2**) (*ca.* 1 mg/mL, 0.614 nmol) in PBS buffer at pH 7.6 was transferred to a 0.5 mL eppendorf tube. 1  $\mu\text{L}$  of reconstituted human plasma (Sigma-Aldrich) was added at room temperature and the resulting mixture vortexed for 30 seconds. After 24 h of additional shaking at 37  $^{\circ}\text{C}$ , a 2  $\mu\text{L}$  aliquot was analyzed by LC-MS (2  $\mu\text{L}$  aliquot diluted by 8  $\mu\text{L}$  of PBS buffer at pH 7.6) and starting protein (**2**) (calculated mass, 16278; observed mass, 16279) was detected unaltered.

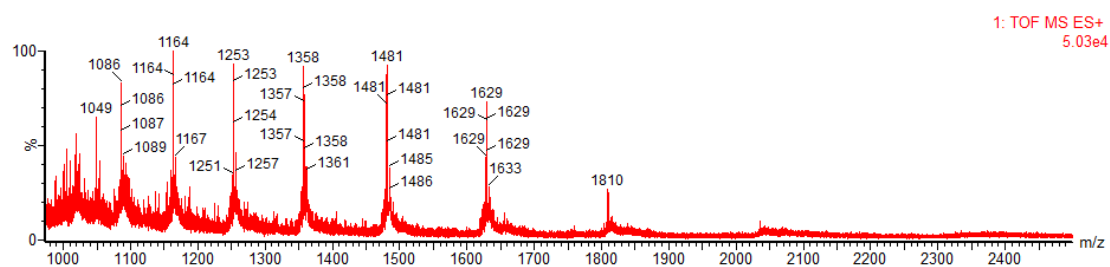

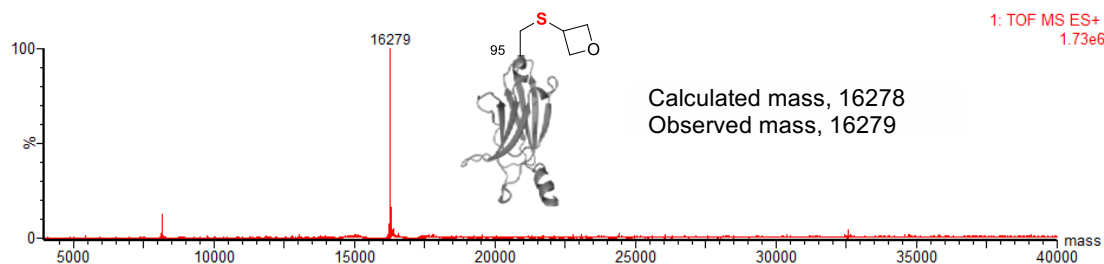

**Figure S6.** ESI-MS of the incubation of C2Am-3-S-Ox (**2**) with human plasma

### Stability of C2Am-3-S-Ox (**2**) in the presence of reduced glutathione (GSH)

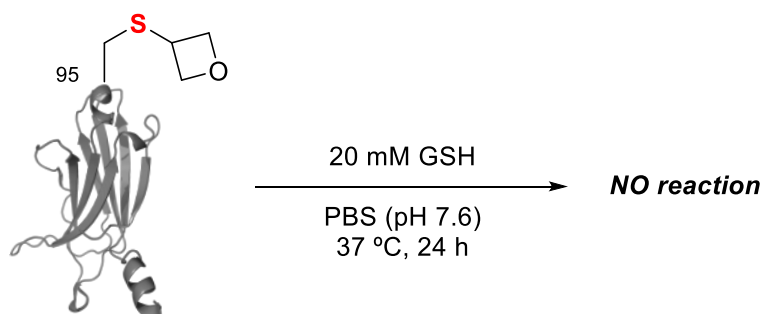

A 10  $\mu\text{L}$  aliquot of C2Am-3-S-Ox (**2**) (*ca.* 1 mg/mL, 0.614 nmol) in PBS buffer at pH 7.6 was transferred to a 0.5 mL eppendorf tube. 1  $\mu\text{L}$  of 20 mM GSH (6 mg in 1 mL of PBS buffer at pH 7.6) was added at room temperature and the resulting mixture vortexed for 30 seconds. After 24 h of additional shaking at 37  $^{\circ}\text{C}$ , a 2  $\mu\text{L}$  aliquot was analyzed by LC-MS (2  $\mu\text{L}$  aliquot diluted by 8  $\mu\text{L}$  of PBS buffer at pH 7.6) and starting protein (**2**) (calculated mass, 16278; observed mass, 16279) was detected unaltered.

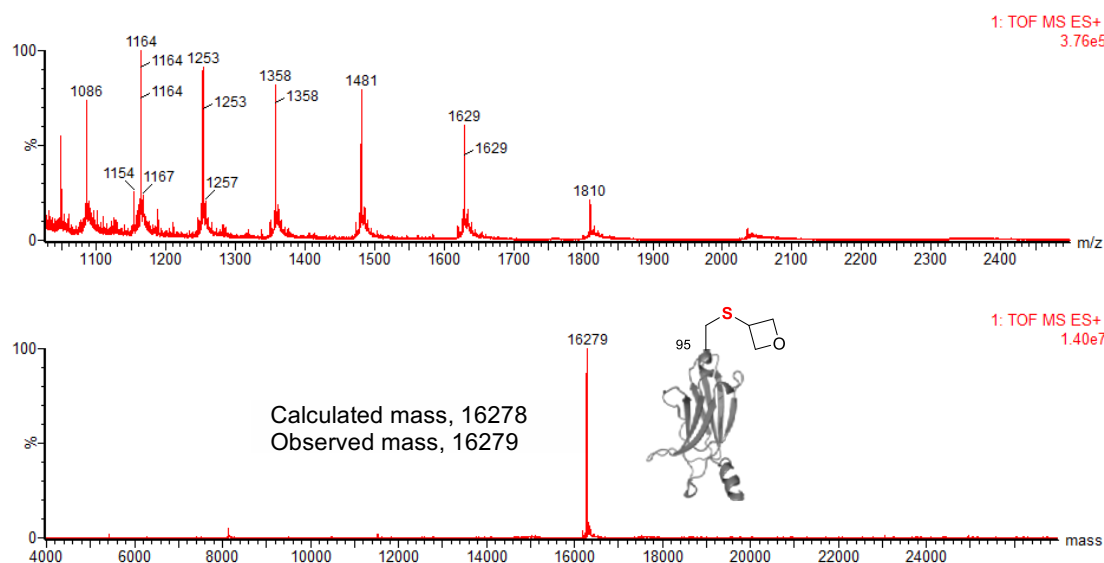

**Figure S7.** ESI-MS of the incubation of C2Am-3-S-Ox (**2**) with 20 mM GSH

## Stability of C2Am-3-S-Ox (2) in the presence of $\beta$ -mercaptoethanol (BME)

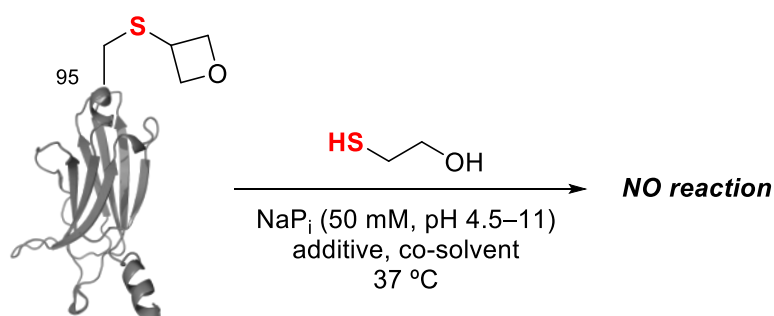

A 10  $\mu$ L aliquot of C2Am-3-S-Ox (2) (*ca.* 0.25 mg/mL, 0.154 nmol) in 50 mM sodium phosphate buffer at pH 11 was transferred to a 0.5 mL eppendorf tube. BME (0.11  $\mu$ L, 1535.8 nmol) was added at room temperature and the resulting mixture vortexed for 30 seconds. After 17 h of additional shaking at 37 °C, a 2  $\mu$ L aliquot was analyzed by LC-MS (2  $\mu$ L aliquot diluted by 8  $\mu$ L of 50 mM sodium phosphate buffer at pH 11) and starting protein (2) (calculated mass, 16278; observed mass, 16279) was detected unaltered.

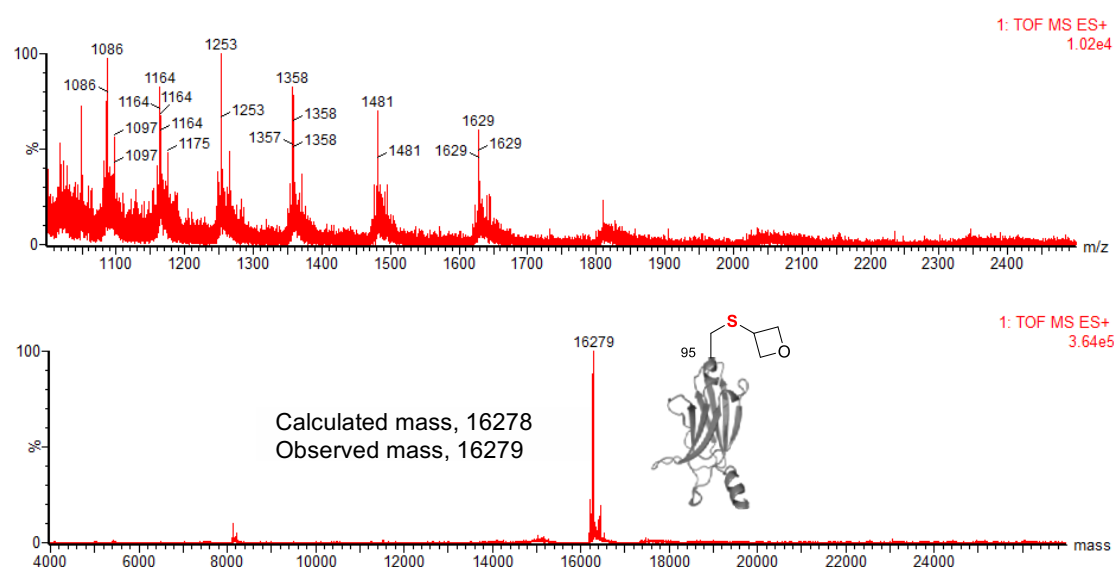

**Figure S8.** ESI-MS of the incubation of C2Am-3-S-Ox (2) with BME (pH 11)

A 10  $\mu$ L aliquot of C2Am-3-S-Ox (2) (*ca.* 0.25 mg/mL, 0.154 nmol) in 50 mM sodium phosphate buffer at pH 11 was transferred to a 0.5 mL eppendorf tube. BME (0.11  $\mu$ L, 1535.8 nmol) and  $\text{MgCl}_2 \cdot 6\text{H}_2\text{O}$  (0.31 mg, 1535.8 nmol) were added at room temperature and the resulting mixture vortexed for 30 seconds. After 20 h of additional shaking at 37 °C, a 2  $\mu$ L aliquot was analyzed by LC-MS (2  $\mu$ L aliquot

diluted by 8  $\mu\text{L}$  of 50 mM sodium phosphate buffer at pH 11) and starting protein (**2**) (calculated mass, 16278; observed mass, 16279) was detected unaltered.

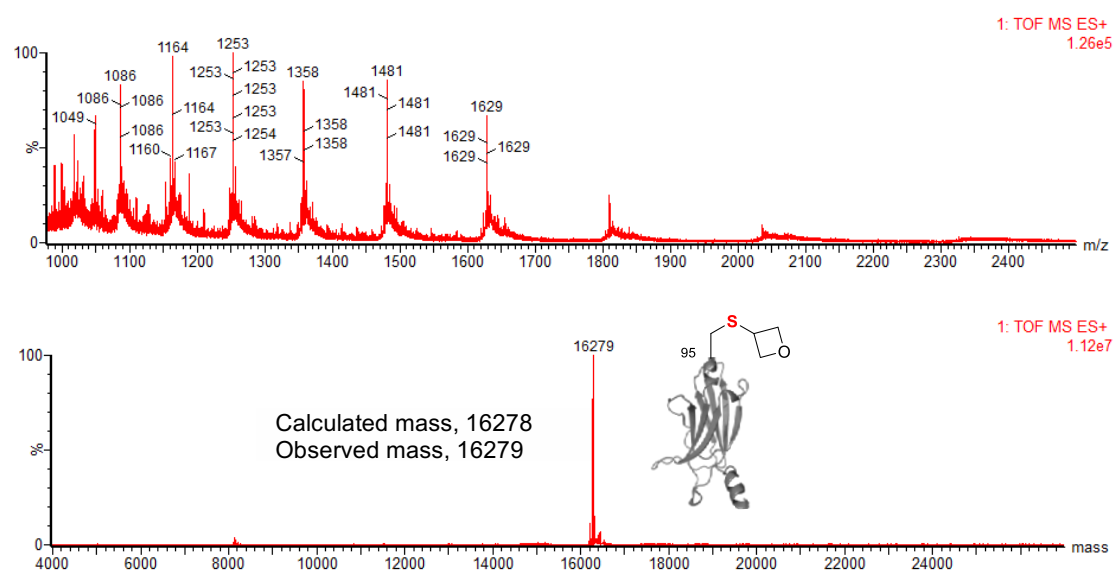

**Figure S9.** ESI-MS of the incubation of C2Am-3-S-Ox (**2**) with BME and  $\text{MgCl}_2 \cdot 6\text{H}_2\text{O}$  (pH 11)

A 10  $\mu\text{L}$  aliquot of C2Am-3-S-Ox (**2**) (*ca.* 0.25 mg/mL, 0.154 nmol) in 50 mM sodium phosphate buffer at pH 11 was transferred to a 0.5 mL eppendorf tube. BME (0.11  $\mu\text{L}$ , 1535.8 nmol) and  $\text{Y}(\text{OTf})_3$  (0.95 mg, 1535.8 nmol) were added at room temperature and the resulting mixture vortexed for 30 seconds. After 20 h of additional shaking at 37  $^\circ\text{C}$ , a 2  $\mu\text{L}$  aliquot was analyzed by LC-MS (2  $\mu\text{L}$  aliquot diluted by 8  $\mu\text{L}$  of 50 mM sodium phosphate buffer at pH 11) and starting protein (**2**) (calculated mass, 16278; observed mass, 16279) was detected unaltered.

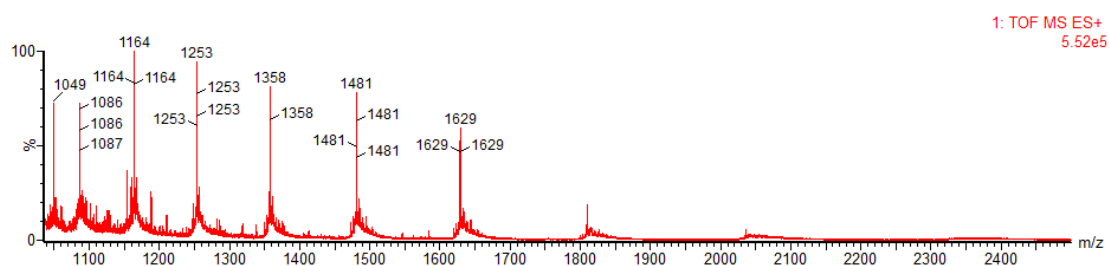

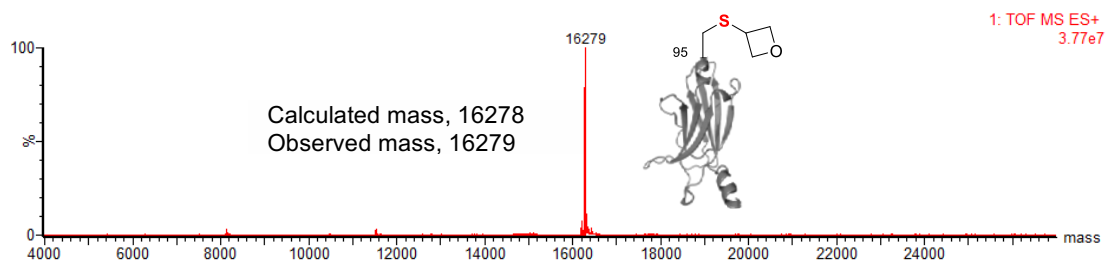

**Figure S10.** ESI-MS of the incubation of C2Am-3-S-Ox (**2**) with BME and Y(OTf)<sub>3</sub> (pH 11)

A 10  $\mu\text{L}$  aliquot of C2Am-3-S-Ox (**2**) (*ca.* 0.25 mg/mL, 0.154 nmol) in 50 mM sodium phosphate buffer at pH 4.5 was transferred to a 0.5 mL eppendorf tube. BME (0.11  $\mu\text{L}$ , 1535.8 nmol), MgCl<sub>2</sub>·6H<sub>2</sub>O (0.31 mg, 1535.8 nmol), and CH<sub>3</sub>CN (2.5  $\mu\text{L}$ ) were added at room temperature and the resulting mixture vortexed for 30 seconds. After 24 h of additional shaking at 37 °C, a 2  $\mu\text{L}$  aliquot was analyzed by LC-MS (2  $\mu\text{L}$  aliquot diluted by 8  $\mu\text{L}$  of 50 mM sodium phosphate buffer at pH 4.5) and starting protein (**2**) (calculated mass, 16278; observed mass, 16279) was detected unaltered.

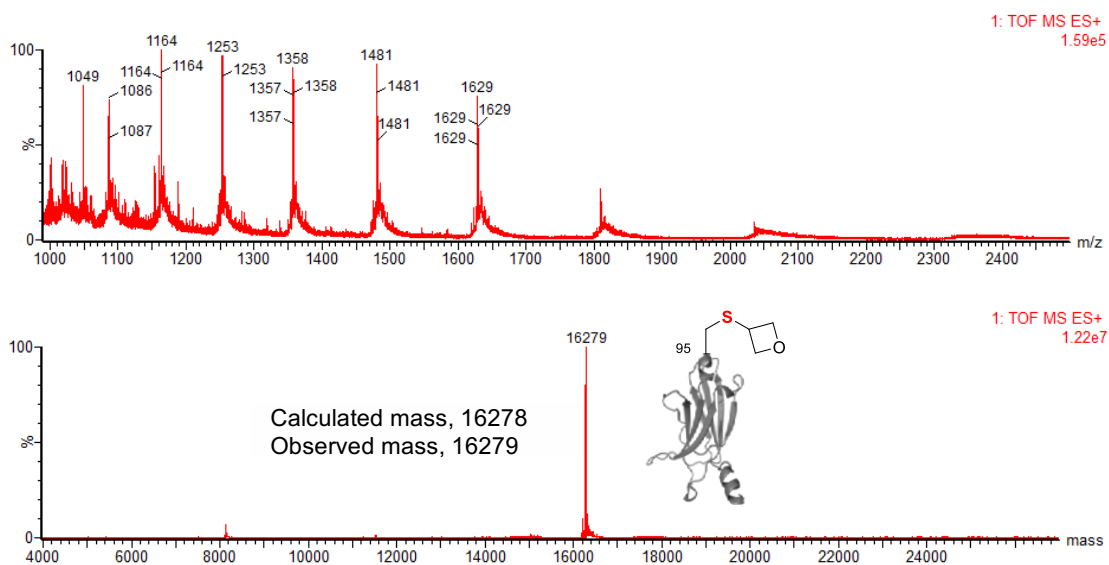

**Figure S11.** ESI-MS of the incubation of C2Am-3-S-Ox (**2**) with BME, MgCl<sub>2</sub>·6H<sub>2</sub>O, and 20% CH<sub>3</sub>CN (pH 4.5)

A 10  $\mu\text{L}$  aliquot of C2Am-3-S-Ox (**2**) (*ca.* 0.25 mg/mL, 0.154 nmol) in 50 mM sodium phosphate buffer at pH 4.5 was transferred to a 0.5 mL eppendorf tube. BME (0.11  $\mu\text{L}$ , 1535.8 nmol), Y(OTf)<sub>3</sub> (0.95 mg, 1535.8 nmol), and CH<sub>3</sub>CN (2.5  $\mu\text{L}$ ) were added at room temperature and the resulting mixture vortexed for 30 seconds. After 24 h of additional shaking at 37 °C, a 2  $\mu\text{L}$  aliquot was analyzed by LC-MS (2  $\mu\text{L}$

aliquot diluted by 8  $\mu\text{L}$  of 50 mM sodium phosphate buffer at pH 4.5) and starting protein (**2**) (calculated mass, 16278; observed mass, 16279) was detected unaltered.

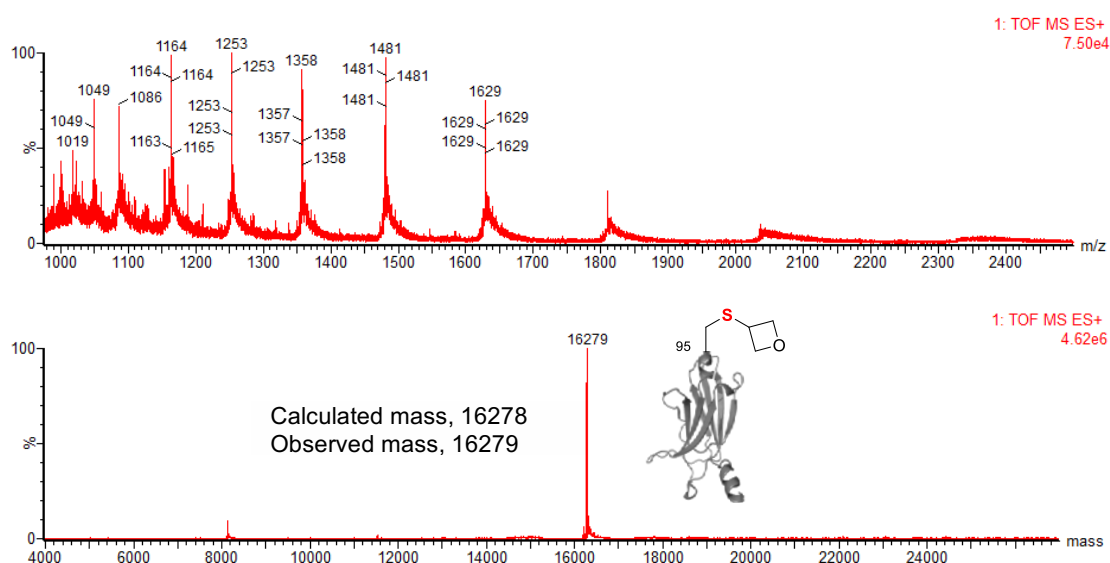

**Figure S12.** ESI-MS of the incubation of C2Am-3-S-Ox (**2**) with BME,  $\text{Y}(\text{OTf})_3$ , and 20%  $\text{CH}_3\text{CN}$  (pH 4.5)

### Stability of C2Am-3-S-Ox (**2**) in the presence of thiophenol (PhSH)

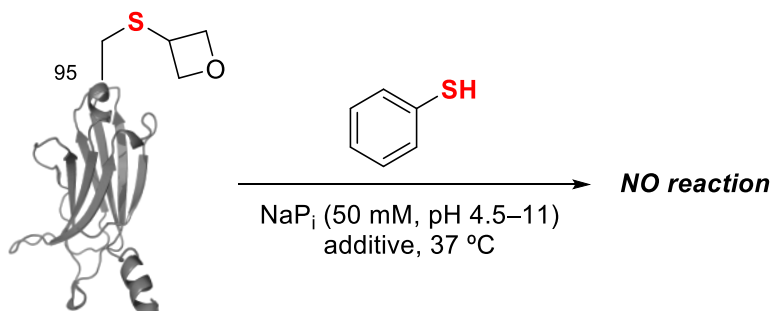

A 10  $\mu\text{L}$  aliquot of C2Am-3-S-Ox (**2**) (*ca.* 0.25 mg/mL, 0.154 nmol) in 50 mM sodium phosphate buffer at pH 11 was transferred to a 0.5 mL eppendorf tube. PhSH (0.16  $\mu\text{L}$ , 1535.8 nmol) was added at room temperature and the resulting mixture vortexed for 30 seconds. After 5 h of additional shaking at 37  $^\circ\text{C}$ , a 2  $\mu\text{L}$  aliquot was analyzed by LC-MS (2  $\mu\text{L}$  aliquot diluted by 8  $\mu\text{L}$  of 50 mM sodium phosphate buffer at pH 11) and starting protein (**2**) (calculated mass, 16278; observed mass, 16279) was detected unaltered.



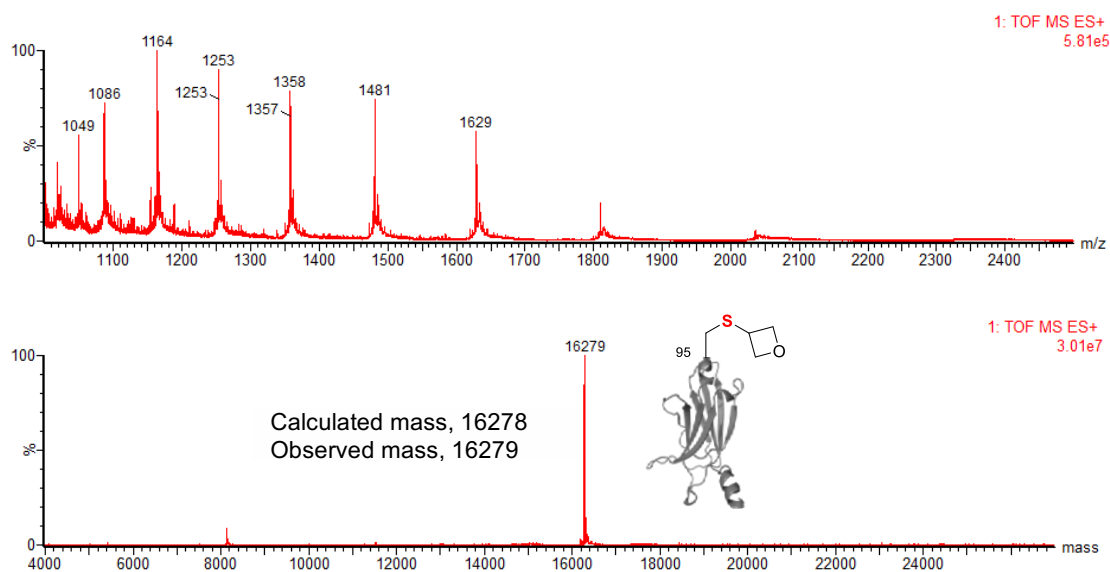

**Figure S13.** ESI-MS of the incubation of C2Am-3-S-Ox (**2**) with PhSH (pH 11)

A 10  $\mu\text{L}$  aliquot of C2Am-3-S-Ox (**2**) (*ca.* 0.25 mg/mL, 0.154 nmol) in 50 mM sodium phosphate buffer at pH 11 was transferred to a 0.5 mL eppendorf tube. PhSH (0.16  $\mu\text{L}$ , 1535.8 nmol) and  $\text{MgCl}_2 \cdot 6\text{H}_2\text{O}$  (0.31 mg, 1535.8 nmol) were added at room temperature and the resulting mixture vortexed for 30 seconds. After 20 h of additional shaking at 37  $^\circ\text{C}$ , a 2  $\mu\text{L}$  aliquot was analyzed by LC-MS (2  $\mu\text{L}$  aliquot diluted by 8  $\mu\text{L}$  of 50 mM sodium phosphate buffer at pH 11) and starting protein (**2**) (calculated mass, 16278; observed mass, 16279) was detected unaltered.

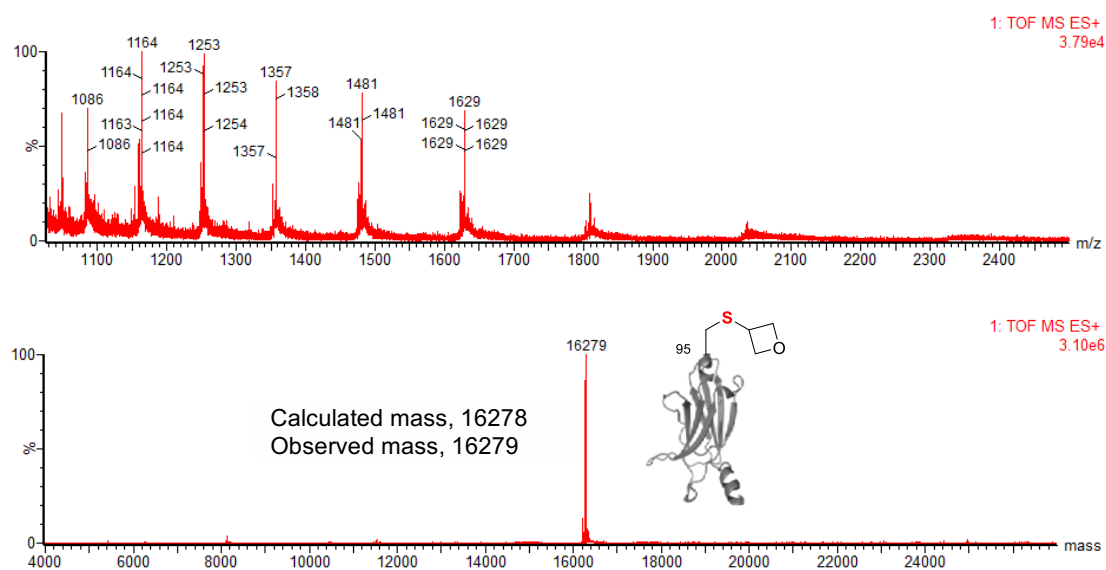

**Figure S14.** ESI-MS of the incubation of C2Am-3-S-Ox (**2**) with PhSH and  $\text{MgCl}_2 \cdot 6\text{H}_2\text{O}$  (pH 11)

A 10  $\mu\text{L}$  aliquot of C2Am-3-S-Ox (**2**) (*ca.* 0.25 mg/mL, 0.154 nmol) in 50 mM sodium phosphate buffer at pH 11 was transferred to a 0.5 mL eppendorf tube. PhSH (0.16  $\mu\text{L}$ , 1535.8 nmol) and  $\text{Y}(\text{OTf})_3$  (0.95 mg, 1535.8 nmol) were added at room temperature and the resulting mixture vortexed for 30 seconds. After 20 h of additional shaking at 37  $^\circ\text{C}$ , a 2  $\mu\text{L}$  aliquot was analyzed by LC-MS (2  $\mu\text{L}$  aliquot diluted by 8  $\mu\text{L}$  of 50 mM sodium phosphate buffer at pH 11) and starting protein (**2**) (calculated mass, 16278; observed mass, 16279) was detected unaltered.

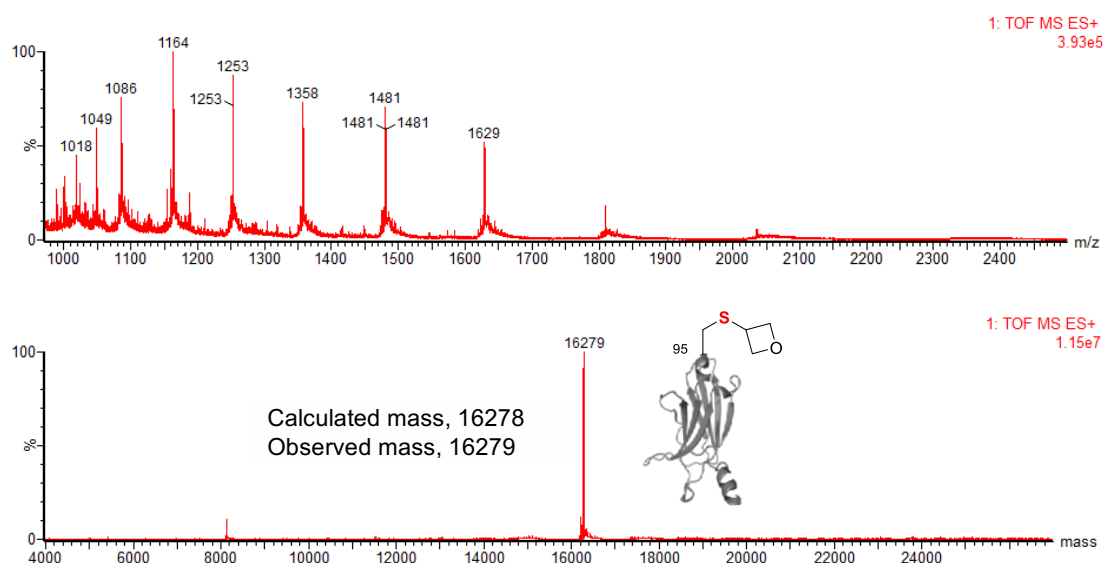

**Figure S15.** ESI-MS of the incubation of C2Am-3-S-Ox (**2**) with PhSH and  $\text{Y}(\text{OTf})_3$  (pH 11)

A 10  $\mu\text{L}$  aliquot of C2Am-3-S-Ox (**2**) (*ca.* 0.25 mg/mL, 0.154 nmol) in 50 mM sodium phosphate buffer at pH 4.5 was transferred to a 0.5 mL eppendorf tube. PhSH (0.16  $\mu\text{L}$ , 1535.8 nmol) and urea (0.18 mg, 3071.6 nmol) were added at room temperature and the resulting mixture vortexed for 30 seconds. After 22 h of additional shaking at 37  $^\circ\text{C}$ , a 2  $\mu\text{L}$  aliquot was analyzed by LC-MS (2  $\mu\text{L}$  aliquot diluted by 8  $\mu\text{L}$  of 50 mM sodium phosphate buffer at pH 4.5) and starting protein (**2**) (calculated mass, 16278; observed mass, 16279) was detected unaltered.

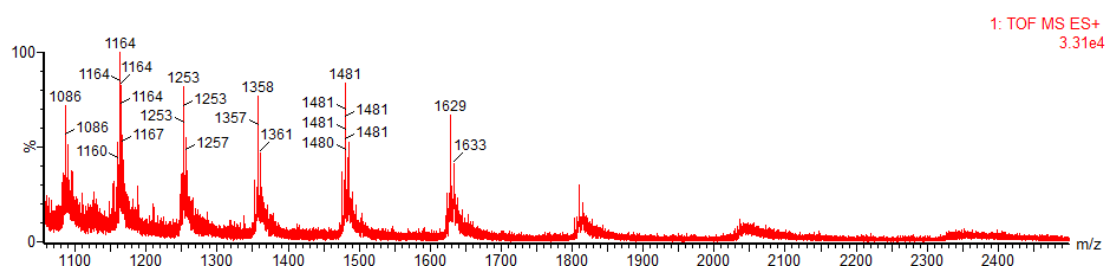

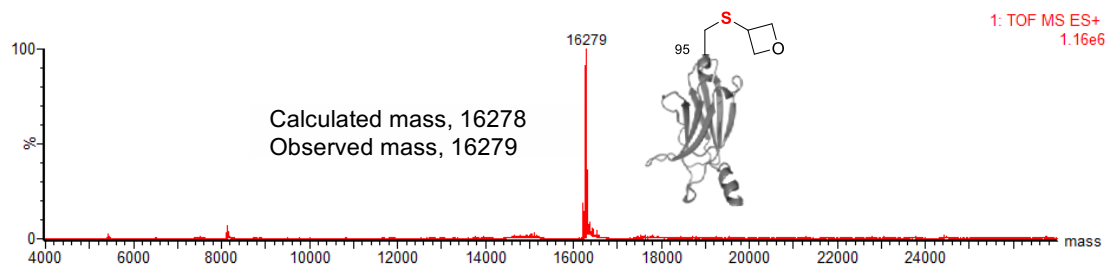

**Figure S16.** ESI-MS of the incubation of C2Am-3-S-Ox (**2**) with PhSH and urea (pH 4.5)

A 10  $\mu\text{L}$  aliquot of C2Am-3-S-Ox (**2**) (*ca.* 0.25 mg/mL, 0.154 nmol) in 50 mM sodium phosphate buffer at pH 4.5 was transferred to a 0.5 mL eppendorf tube. PhSH (0.16  $\mu\text{L}$ , 1535.8 nmol) and *thiourea* (0.12 mg, 3071.6 nmol) were added at room temperature and the resulting mixture vortexed for 30 seconds. After 22 h of additional shaking at 37  $^{\circ}\text{C}$ , a 2  $\mu\text{L}$  aliquot was analyzed by LC-MS (2  $\mu\text{L}$  aliquot diluted by 8  $\mu\text{L}$  of 50 mM sodium phosphate buffer at pH 4.5) and starting protein (**2**) (calculated mass, 16278; observed mass, 16279) was detected unaltered.

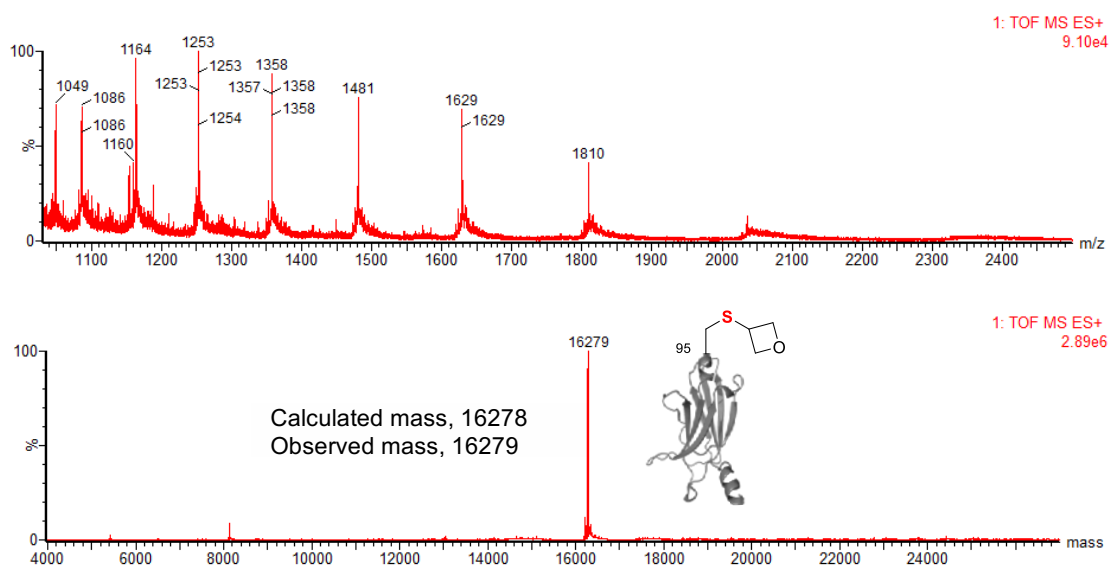

**Figure S17.** ESI-MS of the incubation of C2Am-3-S-Ox (**2**) with PhSH and *thiourea* (pH 4.5)

## Stability of C2Am-3-S-Ox (2) in the presence of $\beta$ GalSNa

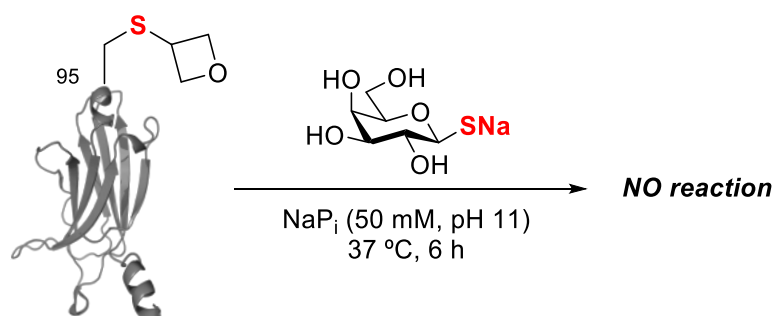

A 10  $\mu\text{L}$  aliquot of C2Am-3-S-Ox (2) (*ca.* 0.25 mg/mL, 0.154 nmol) in 50 mM sodium phosphate buffer at pH 11 was transferred to a 0.5 mL eppendorf tube.  $\beta$ GalSNa (0.30 mg, 1535.8 nmol) was added at room temperature and the resulting mixture vortexed for 30 seconds. After 6 h of additional shaking at 37 °C, a 2  $\mu\text{L}$  aliquot was analyzed by LC-MS (2  $\mu\text{L}$  aliquot diluted by 8  $\mu\text{L}$  of 50 mM sodium phosphate buffer at pH 11) and starting protein (2) (calculated mass, 16278; observed mass, 16279) was detected unaltered.

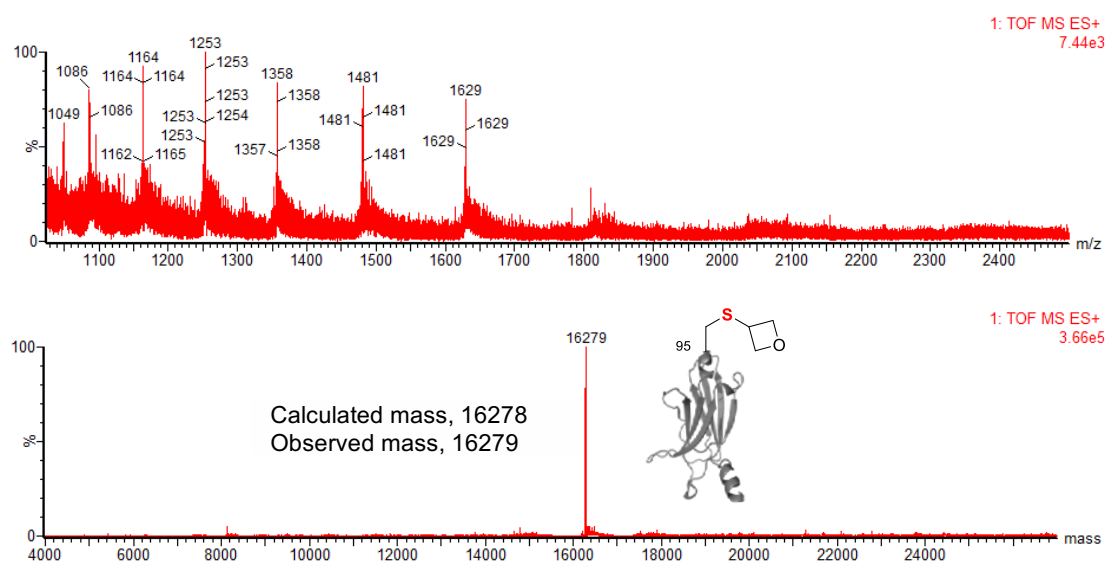

**Figure S18.** ESI-MS of the incubation of C2Am-3-S-Ox (2) with  $\beta$ GalSNa

## Stability of C2Am-3-S-Ox (2) in the presence of benzylamine (BnNH<sub>2</sub>)

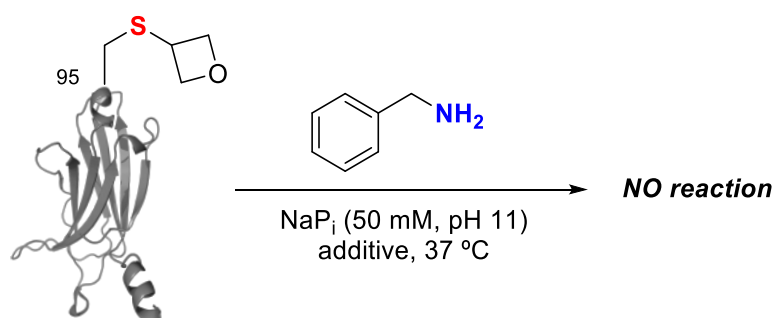

A 10  $\mu$ L aliquot of C2Am-3-S-Ox (2) (*ca.* 0.25 mg/mL, 0.154 nmol) in 50 mM sodium phosphate buffer at pH 11 was transferred to a 0.5 mL eppendorf tube. BnNH<sub>2</sub> (0.17  $\mu$ L, 1535.8 nmol) was added at room temperature and the resulting mixture vortexed for 30 seconds. After 16 h of additional shaking at 37 °C, a 2  $\mu$ L aliquot was analyzed by LC-MS (2  $\mu$ L aliquot diluted by 8  $\mu$ L of 50 mM sodium phosphate buffer at pH 11) and starting protein (2) (calculated mass, 16278; observed mass, 16279) was detected unaltered.

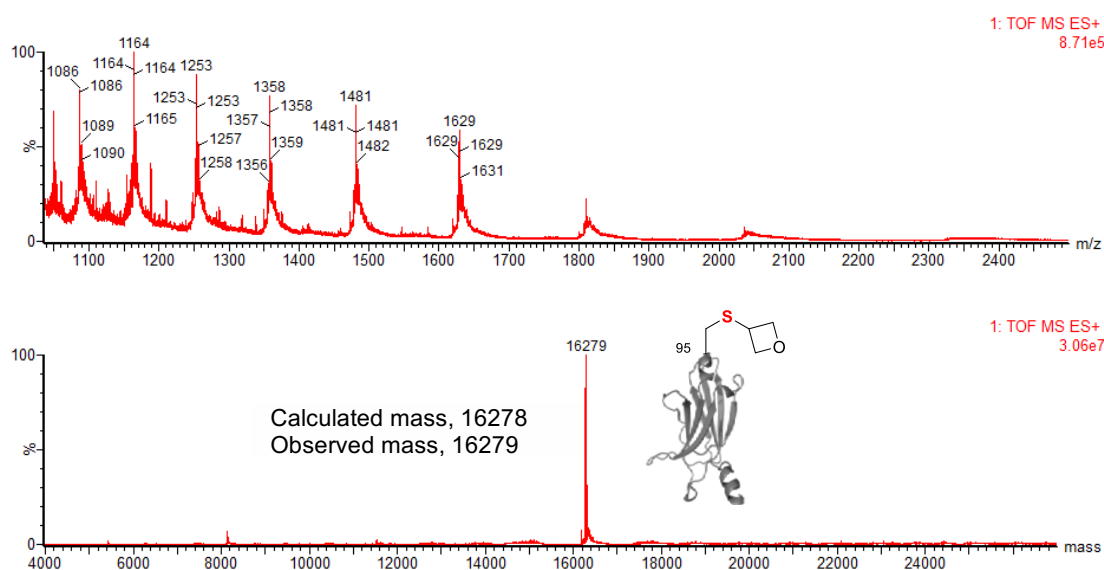

**Figure S19.** ESI-MS of the incubation of C2Am-3-S-Ox (2) with BnNH<sub>2</sub>

A 10  $\mu$ L aliquot of C2Am-3-S-Ox (2) (*ca.* 0.25 mg/mL, 0.154 nmol) in 50 mM sodium phosphate buffer at pH 11 was transferred to a 0.5 mL eppendorf tube. BnNH<sub>2</sub> (0.17  $\mu$ L, 1535.8 nmol) and MgCl<sub>2</sub>·6H<sub>2</sub>O (0.31 mg, 1535.8 nmol) were added at room temperature and the resulting mixture vortexed for 30 seconds. After 3 h of additional shaking at 37 °C, a 2  $\mu$ L aliquot was analyzed by LC-MS (2  $\mu$ L aliquot

diluted by 8  $\mu\text{L}$  of 50 mM sodium phosphate buffer at pH 11) and starting protein (**2**) (calculated mass, 16278; observed mass, 16280) was detected unaltered.

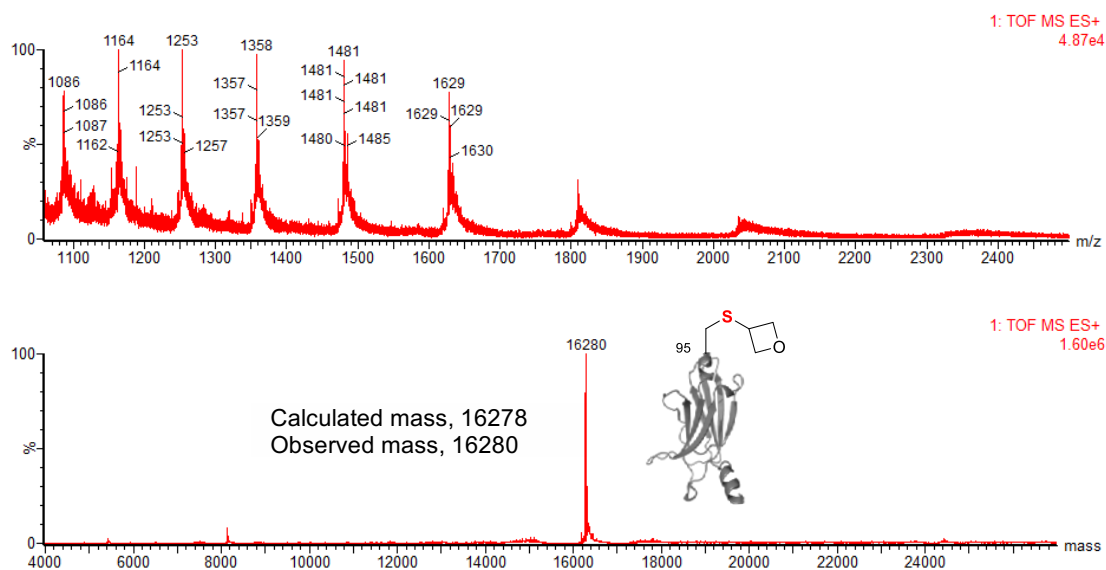

**Figure S20.** ESI-MS of the incubation of C2Am-3-S-Ox (**2**) with BnNH<sub>2</sub> and MgCl<sub>2</sub>·6H<sub>2</sub>O

A 10  $\mu\text{L}$  aliquot of C2Am-3-S-Ox (**2**) (*ca.* 0.25 mg/mL, 0.154 nmol) in 50 mM sodium phosphate buffer at pH 11 was transferred to a 0.5 mL eppendorf tube. BnNH<sub>2</sub> (0.17  $\mu\text{L}$ , 1535.8 nmol) and Y(OTf)<sub>3</sub> (0.95 mg, 1535.8 nmol) were added at room temperature and the resulting mixture vortexed for 30 seconds. After 4 h of additional shaking at 37  $^{\circ}\text{C}$ , a 2  $\mu\text{L}$  aliquot was analyzed by LC-MS (2  $\mu\text{L}$  aliquot diluted by 8  $\mu\text{L}$  of 50 mM sodium phosphate buffer at pH 11) and starting protein (**2**) (calculated mass, 16278; observed mass, 16279) was detected unaltered.

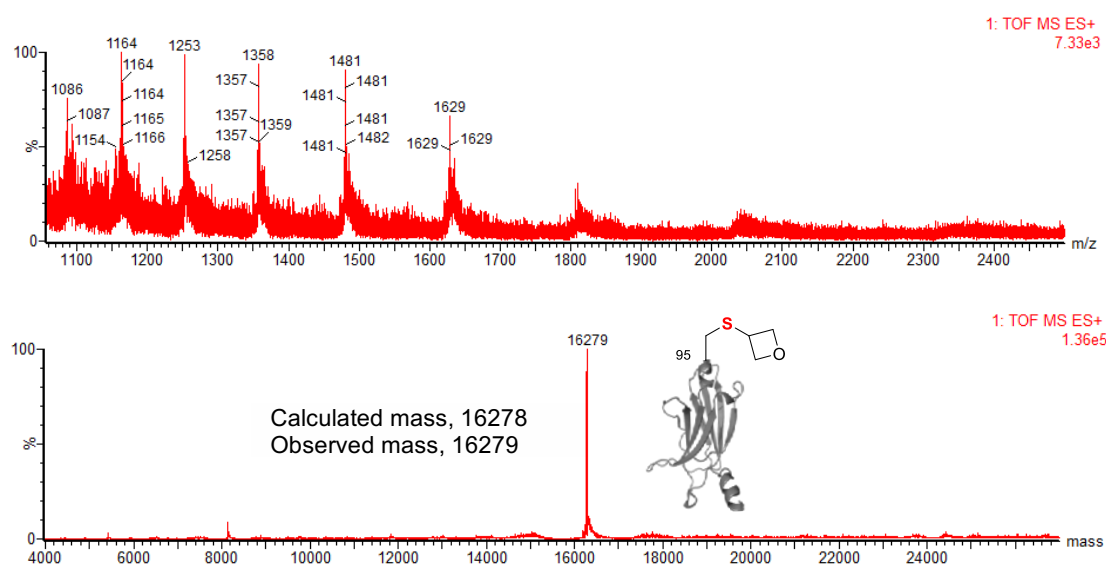

**Figure S21.** ESI-MS of the incubation of C2Am-3-S-Ox (**2**) with BnNH<sub>2</sub> and Y(OTf)<sub>3</sub>

## Reaction of C2Am with 3,3-bis(bromomethyl)oxetane (4)

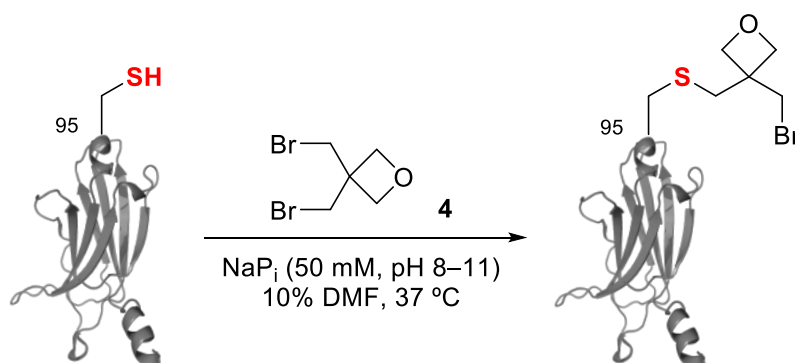

Tris(2-carboxyethyl)phosphine hydrochloride (TCEP·HCl) (2  $\mu$ L of an 11 mg/mL stock solution in H<sub>2</sub>O, 678.0 nmol) was added to a solution of C2Am (25  $\mu$ L, 1 mg/mL, 1.54 nmol) in 50 mM sodium phosphate buffer at pH 8 and the resulting mixture shaken at room temperature for 30 min. 3,3-Bis(bromomethyl)oxetane (4) (0.59 mg, 2.31  $\mu$ mol) in DMF (3  $\mu$ L) was added and the resulting mixture vortexed for 30 seconds. After 5 h of additional shaking at 37 °C, a 3  $\mu$ L aliquot was analyzed by LC-MS (3  $\mu$ L aliquot diluted by 7  $\mu$ L of 50 mM sodium phosphate buffer at pH 8) and complete conversion to C2Am-BrCH<sub>2</sub>-S-Ox (5) (calculated mass, 16385; observed mass, 16386) was observed.

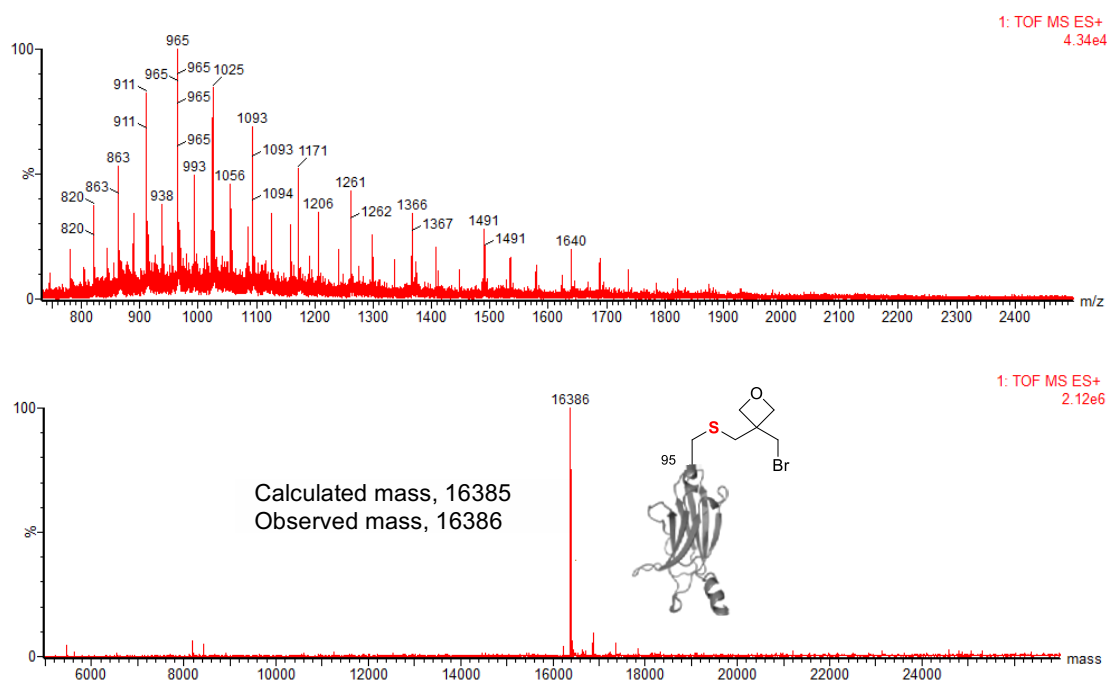

**Figure S22.** ESI-MS of the reaction of C2Am with 3,3-bis(bromomethyl)oxetane (4) (pH 8)

Tris(2-carboxyethyl)phosphine hydrochloride (TCEP·HCl) (2  $\mu$ L of a 44 mg/mL stock solution in H<sub>2</sub>O, 27.1  $\mu$ mol) was added to a solution of C2Am (100  $\mu$ L, 1 mg/mL, 6.16 nmol) in 50 mM sodium phosphate buffer at pH 11 and the resulting mixture shaken at room temperature for 45 min. 3,3-Bis(bromomethyl)oxetane (**4**) (2.4 mg, 9.25  $\mu$ mol) in DMF (12.4  $\mu$ L) was added and the resulting mixture vortexed for 30 seconds. After 2 h of additional shaking at 37  $^{\circ}$ C, a 2  $\mu$ L aliquot was analyzed by LC-MS (2  $\mu$ L aliquot diluted by 8  $\mu$ L of 50 mM sodium phosphate buffer at pH 11) and complete conversion to C2Am-BrCH<sub>2</sub>-S-Ox (**5**) (calculated mass, 16385; observed mass, 16386) was observed. Small molecules were removed from the reaction mixture by loading the sample onto a Zeba™ Spin desalting column (ThermoFisher Scientific) previously equilibrated with PBS buffer at pH 7.6. The sample was eluted by centrifugation (2 min, 1500xg). The protein sample (1 mg/mL by Bradford assay) was flash frozen with liquid nitrogen and stored at  $-20$   $^{\circ}$ C.

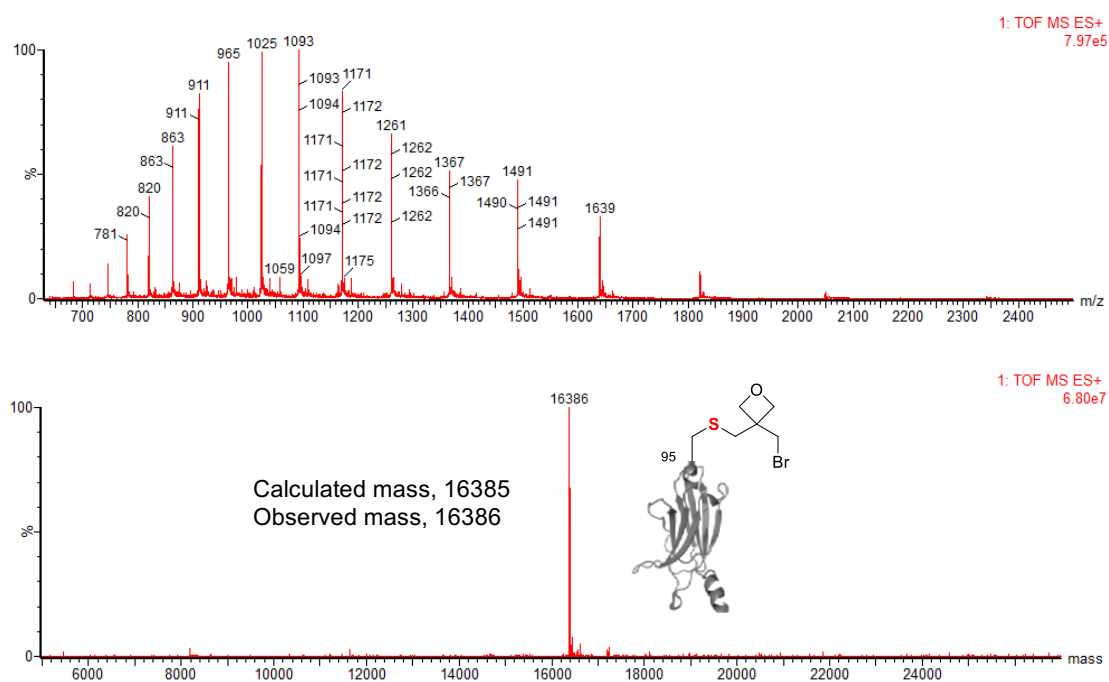

**Figure S23.** ESI-MS of the reaction of C2Am with 3,3-bis(bromomethyl)oxetane (**4**) (pH 11)



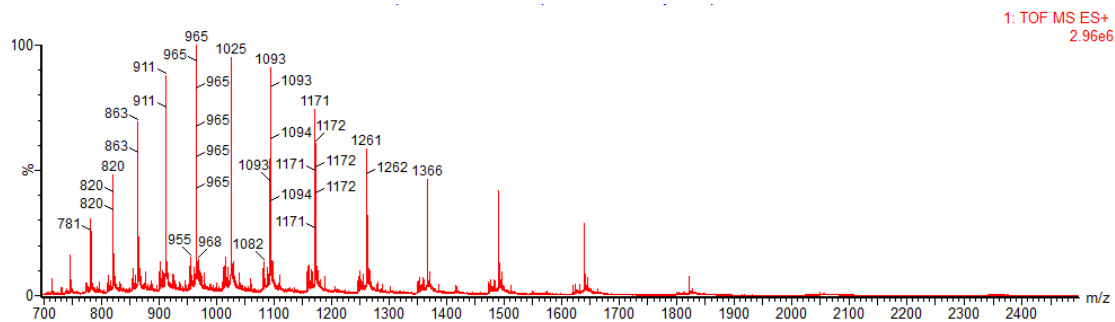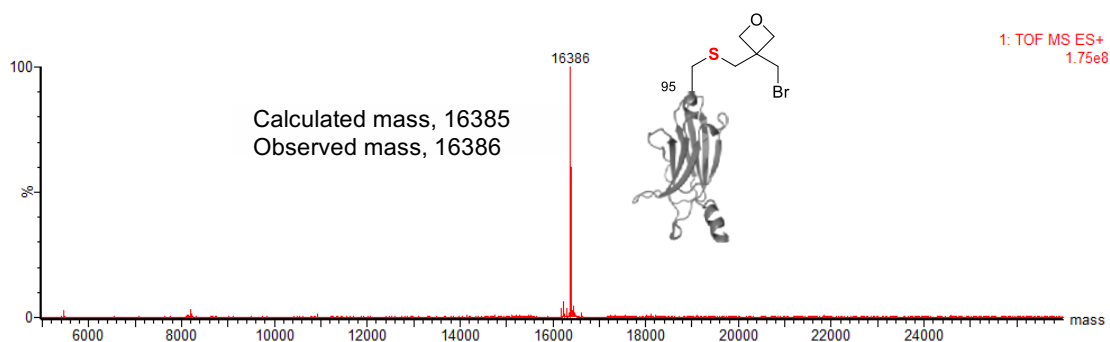

**Figure S24.** ESI-MS of C2Am-BrCH<sub>2</sub>-S-Ox (**5**) after incubation at 37 °C for 8 h (pH 11)

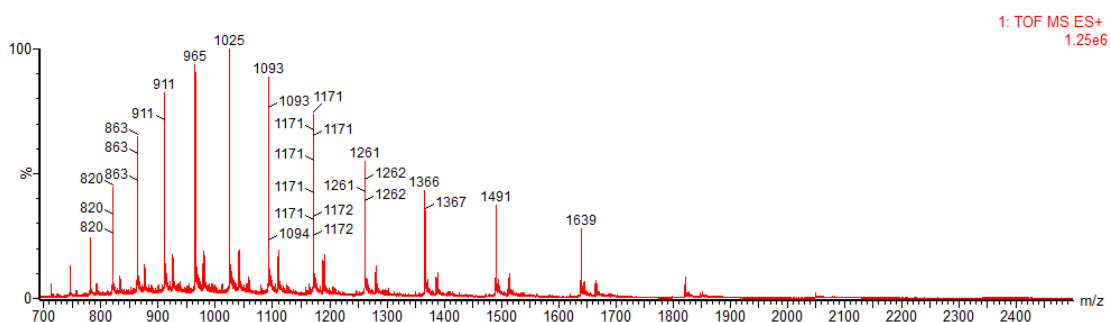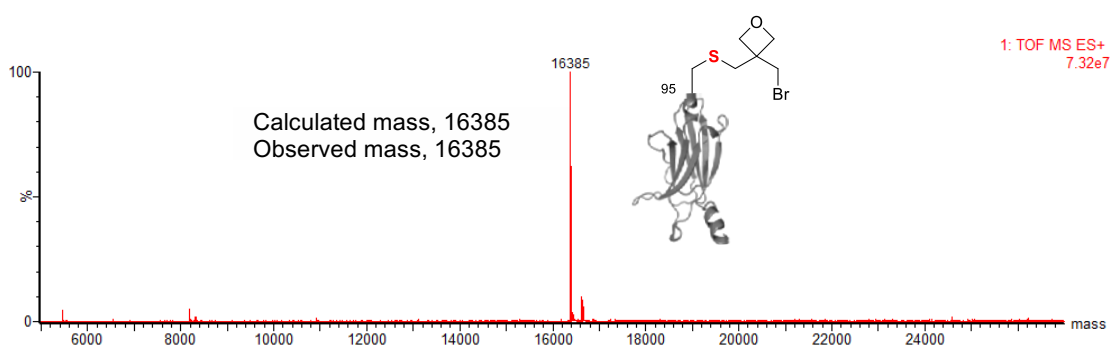

**Figure S25.** ESI-MS of C2Am-BrCH<sub>2</sub>-S-Ox (**5**) after storage at -20 °C for >9 months in PBS (pH 7.6)

### Control: incubation of C2Am-BrCH<sub>2</sub>-S-Ox (5) with Ellman's reagent

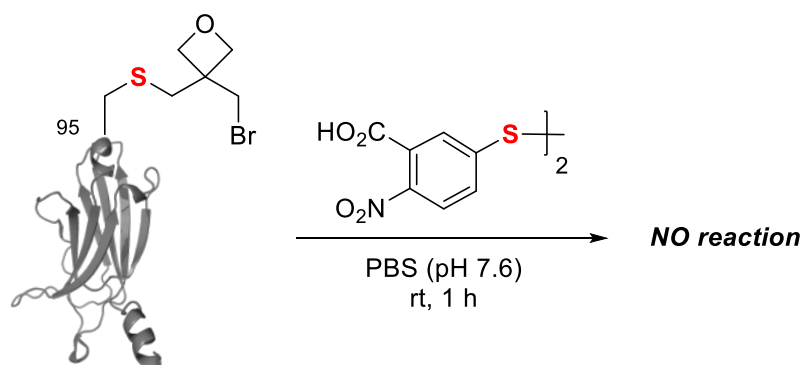

All manipulations were carried out at room temperature. A 10  $\mu$ L aliquot of C2Am-BrCH<sub>2</sub>-S-Ox (5) (*ca.* 1 mg/mL, 0.614 nmol) in PBS buffer at pH 7.6 was transferred to a 0.5 mL eppendorf tube. Ellman's reagent (0.3  $\mu$ L of a 20 mg/mL stock solution in H<sub>2</sub>O, 15.14 nmol) was added and the resulting mixture vortexed for 30 seconds. After 1 h of additional shaking, a 3  $\mu$ L aliquot was analyzed by LC-MS (3  $\mu$ L aliquot diluted by 7  $\mu$ L of PBS buffer at pH 7.6) and starting protein (2) (calculated mass, 16278; observed mass, 16279) was detected unaltered.

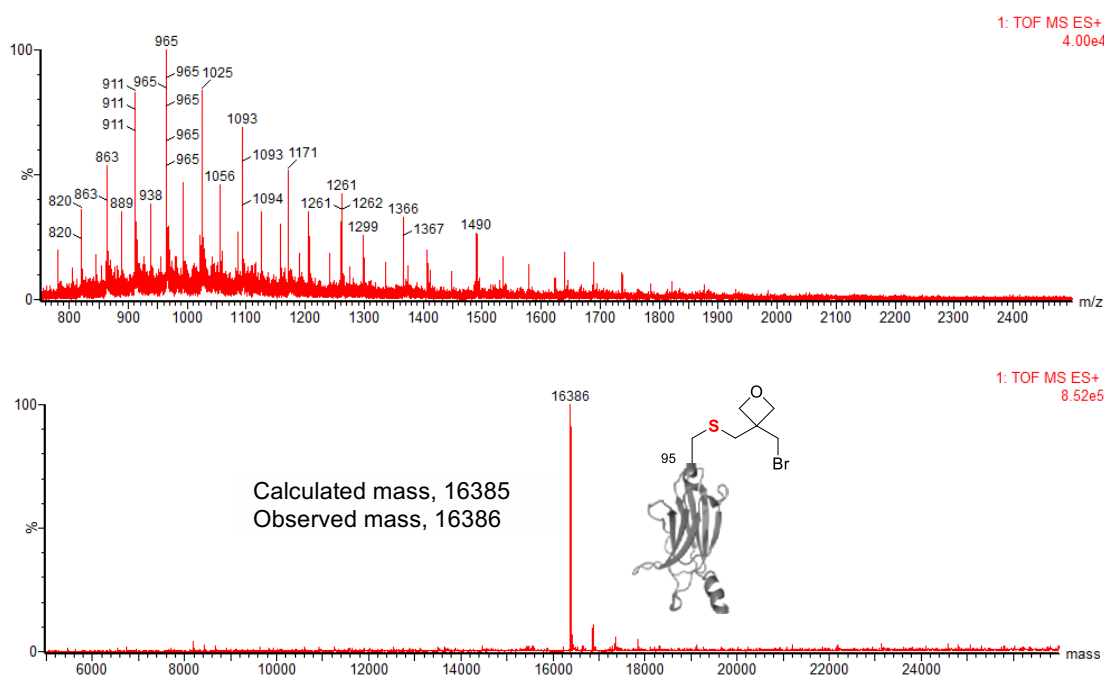

**Figure S26.** ESI-MS of the incubation of C2Am-BrCH<sub>2</sub>-S-Ox (5) with Ellman's reagent

### Reaction of C2Am-BrCH<sub>2</sub>-S-Ox (5) with βGalSNa

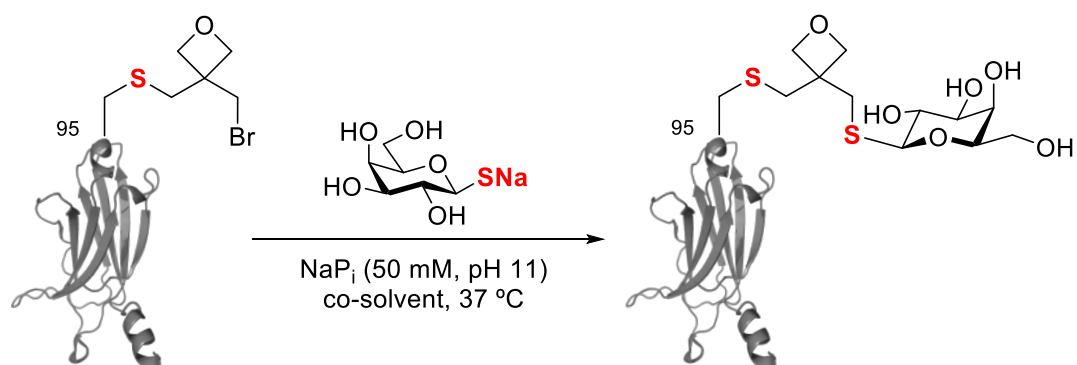

C2Am-BrCH<sub>2</sub>-S-Ox (**5**) was prepared as a 0.34 mg/mL solution in 50 mM sodium phosphate buffer at pH 11 and 10 μL (0.208 nmol) were transferred to a 0.5 mL eppendorf tube. βGalSNa (0.45 mg, 2.08 μmol) was added at room temperature and the resulting mixture vortexed for 30 seconds. After 23 h of additional shaking at 37 °C, a 2 μL aliquot was analyzed by LC-MS (2 μL aliquot diluted by 8 μL of 50 mM sodium phosphate buffer at pH 11) and complete conversion to C2Am-βGalSCH<sub>2</sub>-S-Ox (**7a**) (calculated mass, 16500; observed mass, 16501) was observed.

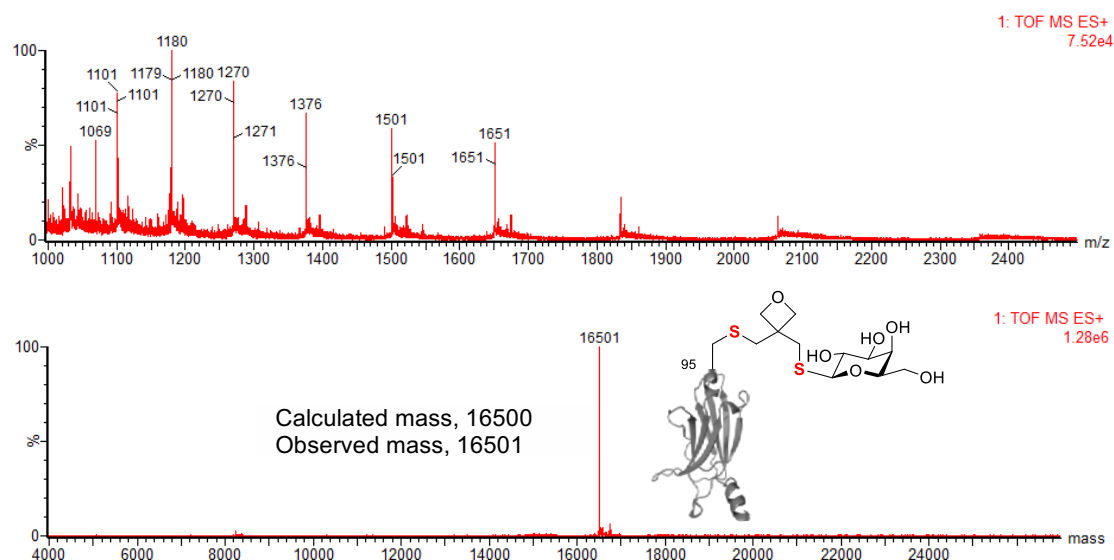

**Figure S27.** ESI-MS of the reaction of C2Am-BrCH<sub>2</sub>-S-Ox (**5**) with βGalSNa

C2Am-BrCH<sub>2</sub>-S-Ox (**5**) was prepared as a 0.34 mg/mL solution in 50 mM sodium phosphate buffer at pH 11 and 10 μL (0.208 nmol) were transferred to a 0.5 mL eppendorf tube. βGalSNa (1.2 μL of a 0.5 mg stock solution in 13 μL DMF, 208 nmol) was added at room temperature and the resulting mixture vortexed for 30 seconds. After 24 h of additional shaking at 37 °C, a 2 μL aliquot was analyzed by

LC-MS (2  $\mu$ L aliquot diluted by 8  $\mu$ L of 50 mM sodium phosphate buffer at pH 11) and complete conversion to C2Am- $\beta$ GalSCH<sub>2</sub>-S-Ox (**7a**) (calculated mass, 16500; observed mass, 16501) was observed.

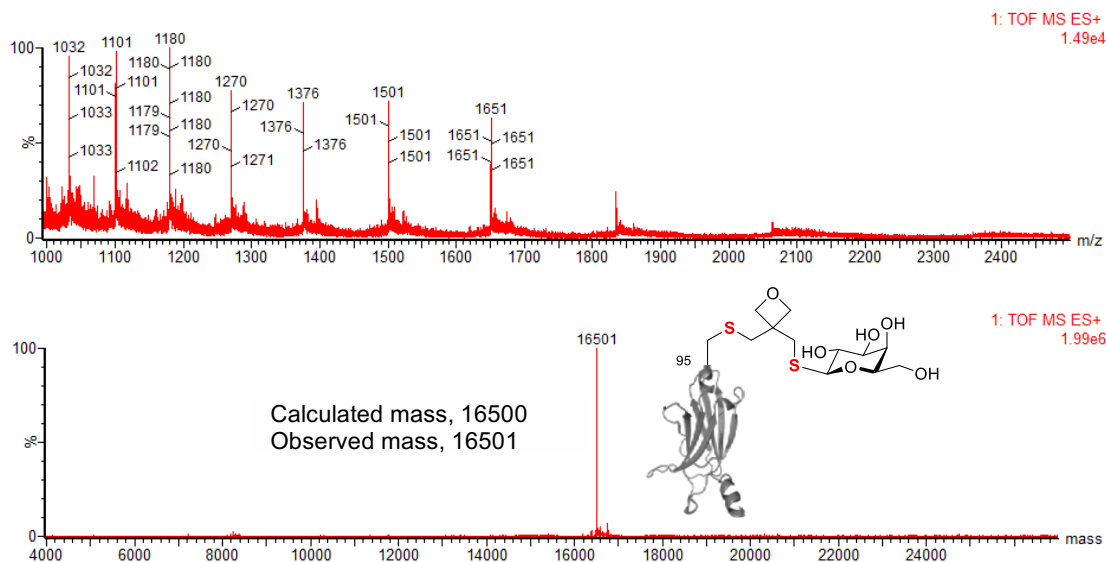

**Figure S28.** ESI-MS of the reaction of C2Am-BrCH<sub>2</sub>-S-Ox (**5**) with  $\beta$ GalSNa and 10% DMF

### Reaction of C2Am-BrCH<sub>2</sub>-S-Ox (**5**) with BME

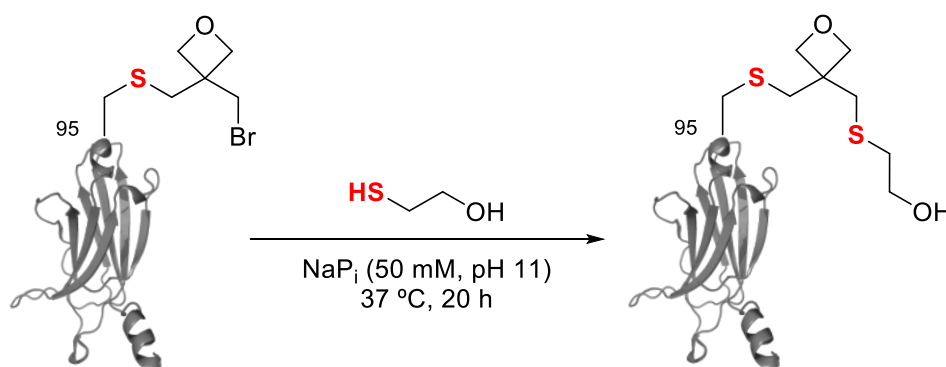

C2Am-BrCH<sub>2</sub>-S-Ox (**5**) was prepared as a 0.34 mg/mL solution in 50 mM sodium phosphate buffer at pH 11 and 10  $\mu$ L (0.208 nmol) were transferred to a 0.5 mL eppendorf tube. BME (0.15  $\mu$ L mg, 2.08  $\mu$ mol) was added at room temperature and the resulting mixture vortexed for 30 seconds. After 20 h of additional shaking at 37  $^{\circ}$ C, a 2  $\mu$ L aliquot was analyzed by LC-MS (2  $\mu$ L aliquot diluted by 8  $\mu$ L of 50 mM sodium phosphate buffer at pH 11) and complete conversion to C2Am-BMECH<sub>2</sub>-S-Ox (**7b**) (calculated mass, 16382; observed mass, 16384) was observed.

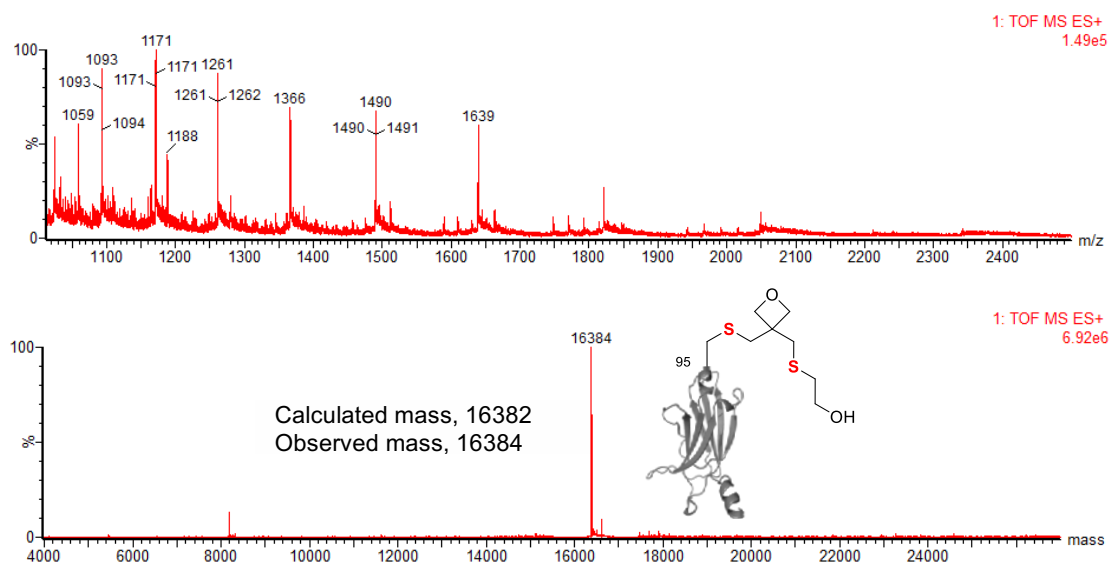

**Figure S29.** ESI-MS of the reaction of C2Am-BrCH<sub>2</sub>-S-Ox (**5**) with BME

*Control (starting material 5 and product 7b have similar masses):* to the above reaction mixture, PhSH (1.2  $\mu$ L of a 0.5 mg stock solution in 13  $\mu$ L DMF, 208 nmol) was added at room temperature and the resulting mixture vortexed for 30 seconds. After 15 h of additional shaking at 37  $^{\circ}$ C, a 2  $\mu$ L aliquot was analyzed by LC-MS (2  $\mu$ L aliquot diluted by 8  $\mu$ L of 50 mM sodium phosphate buffer at pH 11) and C2Am-BMECH<sub>2</sub>-S-Ox (**7b**) (calculated mass, 16382; observed mass, 16383) was detected unaltered.

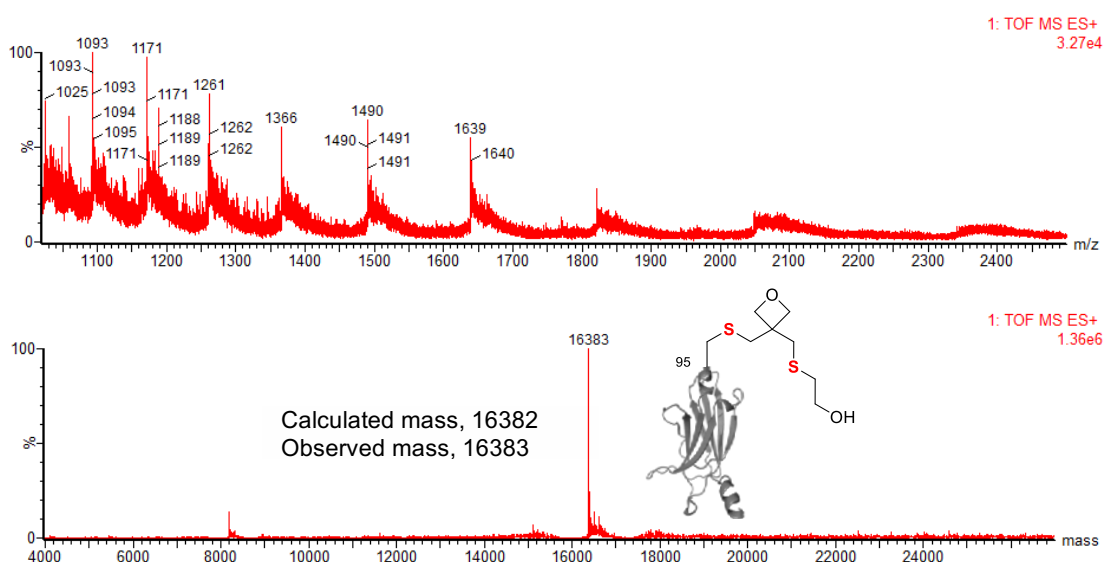

**Figure S30.** ESI-MS of the incubation of C2Am-BMECH<sub>2</sub>-S-Ox (**7b**) with PhSH and 10% DMF

### Reaction of C2Am-BrCH<sub>2</sub>-S-Ox (5) with PhSH

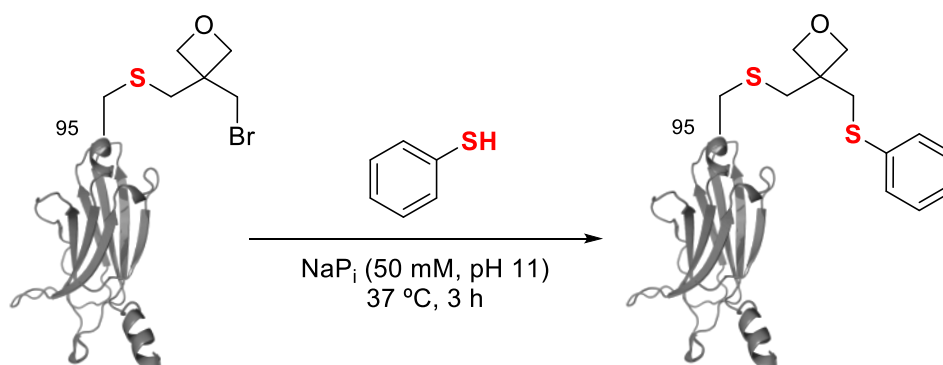

C2Am-BrCH<sub>2</sub>-S-Ox (5) was prepared as a 0.34 mg/mL solution in 50 mM sodium phosphate buffer at pH 11 and 10  $\mu$ L (0.208 nmol) were transferred to a 0.5 mL eppendorf tube. BME (0.25  $\mu$ L mg, 2.08  $\mu$ mol) was added at room temperature and the resulting mixture vortexed for 30 seconds. After 3 h of additional shaking at 37  $^{\circ}$ C, a 2  $\mu$ L aliquot was analyzed by LC-MS (2  $\mu$ L aliquot diluted by 8  $\mu$ L of 50 mM sodium phosphate buffer at pH 11) and complete conversion to C2Am-PhSCH<sub>2</sub>-S-Ox (7c) (calculated mass, 16414; observed mass, 16415) was observed.

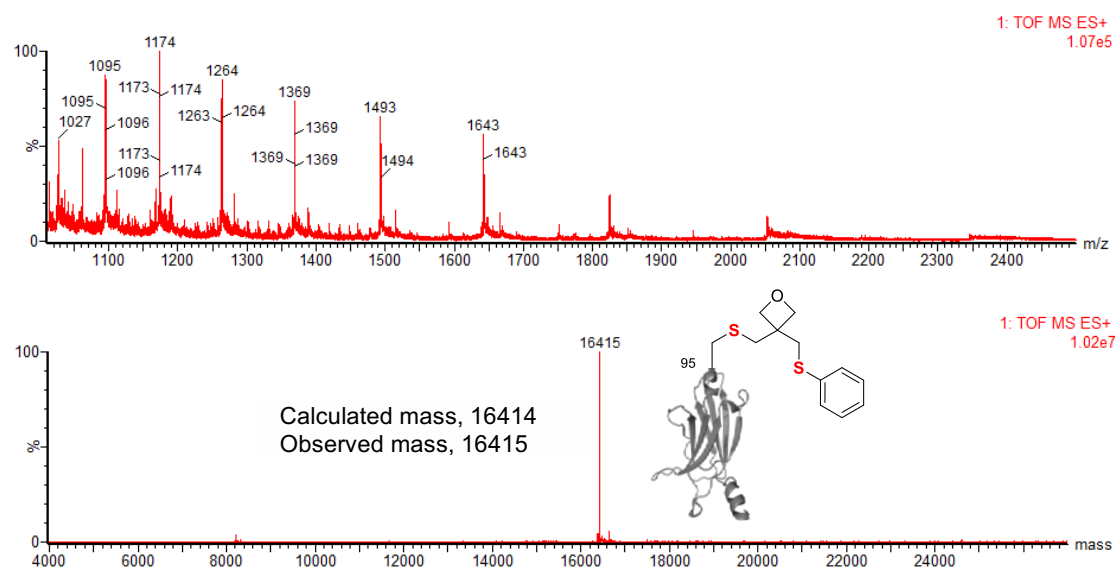

**Figure S31.** ESI-MS of the reaction of C2Am-BrCH<sub>2</sub>-S-Ox (5) with PhSH

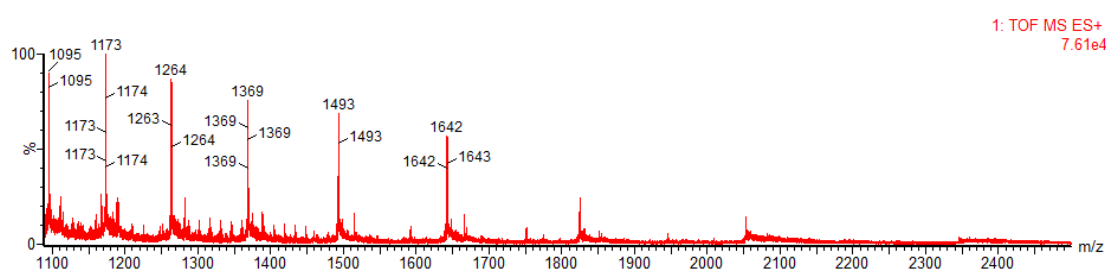

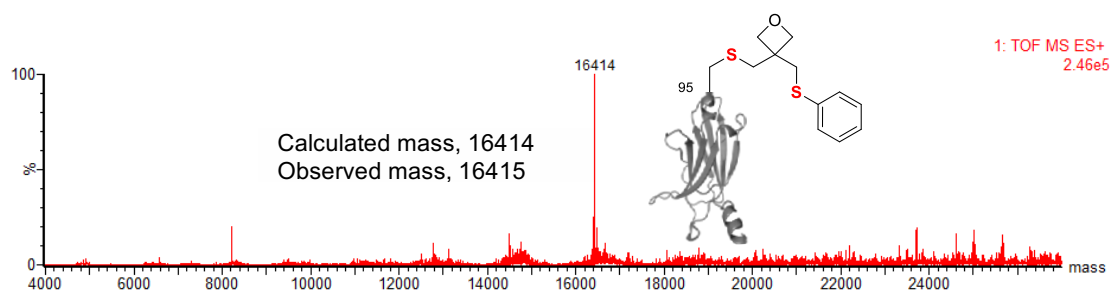

**Figure S32.** ESI-MS of the reaction of C2Am-BrCH<sub>2</sub>-S-Ox (**5**) with PhSH; 15 h of extended reaction time once the alkylation is completed

### Reaction of C2Am-BrCH<sub>2</sub>-S-Ox (**5**) with BnNH<sub>2</sub>

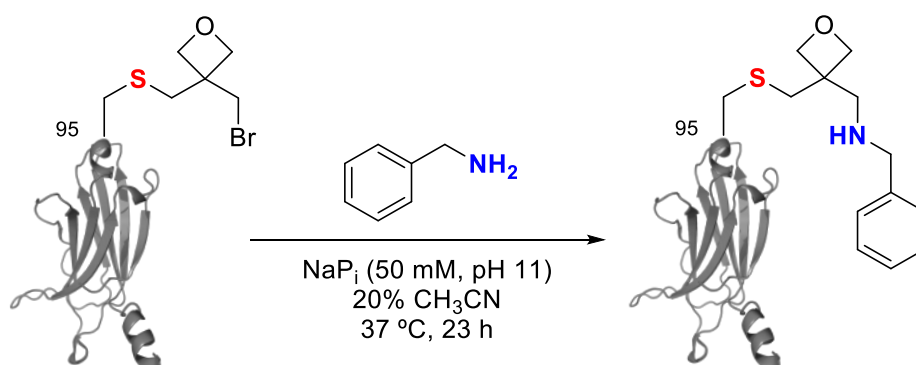

C2Am-BrCH<sub>2</sub>-S-Ox (**5**) was prepared as a 0.34 mg/mL solution in 50 mM sodium phosphate buffer at pH 11 and 10  $\mu$ L (0.208 nmol) were transferred to a 0.5 mL eppendorf tube. BnNH<sub>2</sub> (0.23  $\mu$ L, 2.08  $\mu$ mol) in CH<sub>3</sub>CN (2.5  $\mu$ L) was added at room temperature and the resulting mixture vortexed for 30 seconds. After 23 h of additional shaking at 37  $^{\circ}$ C, a 2  $\mu$ L aliquot was analyzed by LC-MS (2  $\mu$ L aliquot diluted by 8  $\mu$ L of 50 mM sodium phosphate buffer at pH 11) and complete conversion to C2Am-BnNHCH<sub>2</sub>-S-Ox (**7d**) (calculated mass, 16411; observed mass, 16413) was observed.

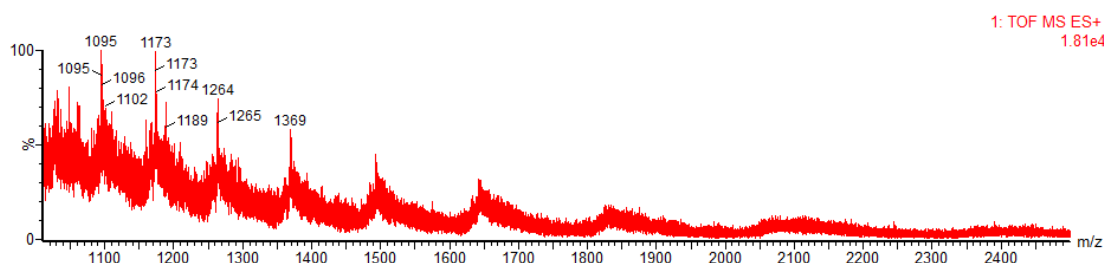

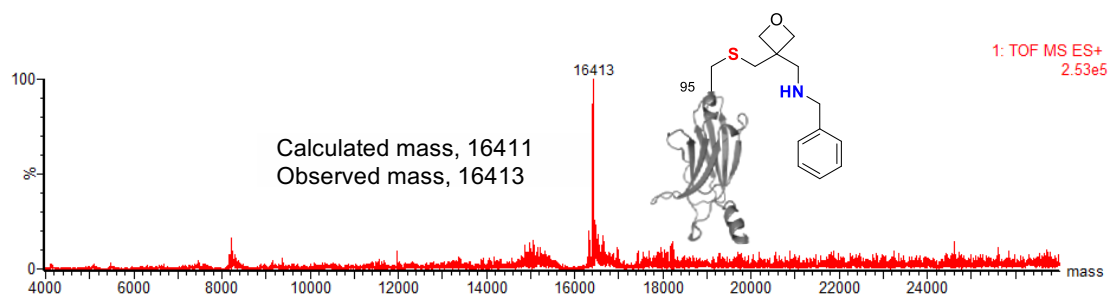

**Figure S33.** ESI-MS of the reaction of C2Am-BrCH<sub>2</sub>-S-Ox (**5**) with BnNH<sub>2</sub>

### Stability of C2Am-PhSCH<sub>2</sub>-S-Ox (**7c**) in human plasma

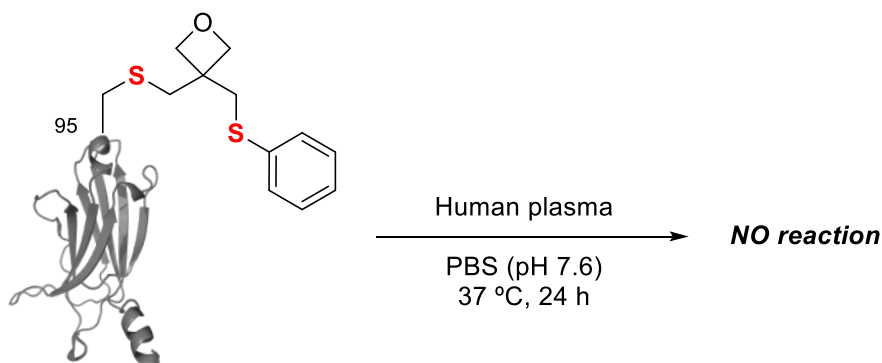

C2Am-PhSCH<sub>2</sub>-S-Ox (**7c**) was prepared as a *ca.* 0.34 mg/mL solution in PBS buffer at pH 7.6 and 10  $\mu$ L (0.208 nmol) were transferred to a 0.5 mL eppendorf tube. 1  $\mu$ L of reconstituted human plasma (Sigma-Aldrich) was added at room temperature and the resulting mixture vortexed for 30 seconds. After 24 h of additional shaking at 37  $^{\circ}$ C, a 2  $\mu$ L aliquot was analyzed by LC-MS (2  $\mu$ L aliquot diluted by 8  $\mu$ L of PBS buffer at pH 7.6) and starting protein (**7c**) (calculated mass, 16414; observed mass, 16415) was detected unaltered.

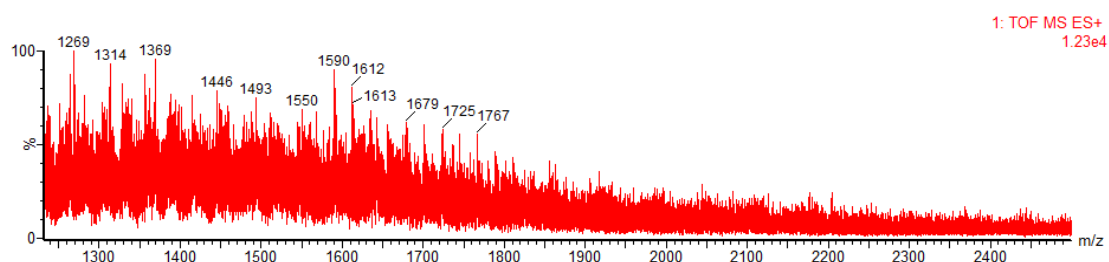



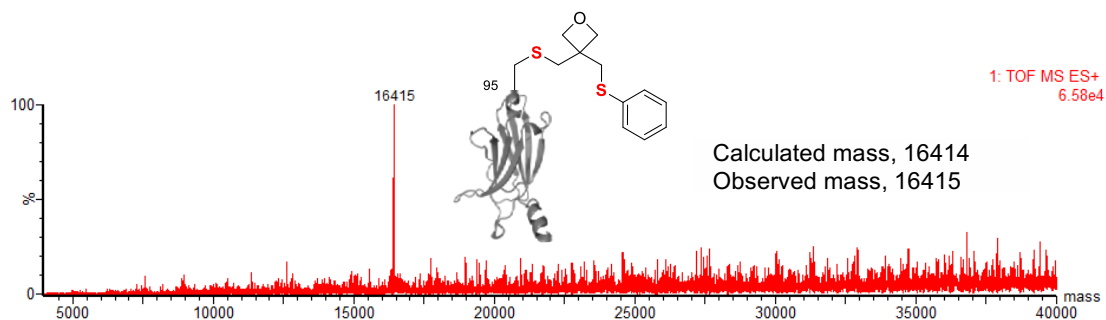

**Figure S34.** ESI-MS of the incubation of C2Am-PhSCH<sub>2</sub>-S-Ox (**7c**) with human plasma

### Stability of C2Am-PhSCH<sub>2</sub>-S-Ox (**7c**) in the presence of GSH

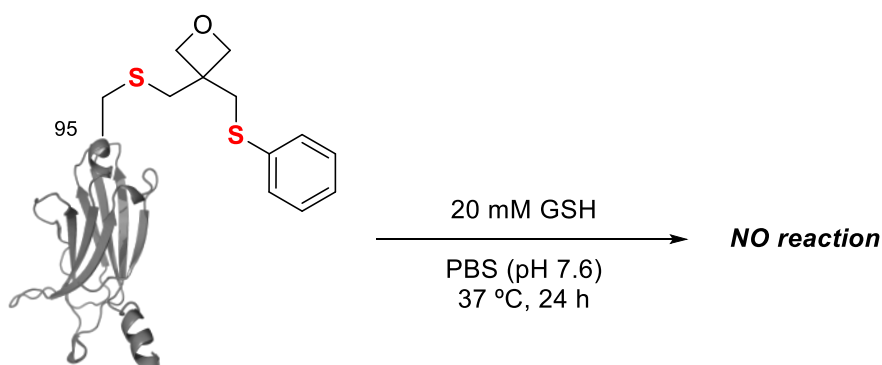

C2Am-PhSCH<sub>2</sub>-S-Ox (**7c**) was prepared as a *ca.* 0.34 mg/mL solution in PBS buffer at pH 7.6 and 10  $\mu$ L (0.208 nmol) were transferred to a 0.5 mL eppendorf tube. 1  $\mu$ L of 20 mM GSH (6 mg in 1 mL of PBS buffer at pH 7.6) was added at room temperature and the resulting mixture vortexed for 30 seconds. After 24 h of additional shaking at 37  $^\circ$ C, a 2  $\mu$ L aliquot was analyzed by LC-MS (2  $\mu$ L aliquot diluted by 8  $\mu$ L of PBS buffer at pH 7.6) and starting protein (**7c**) (calculated mass, 16414; observed mass, 16415) was detected unaltered.

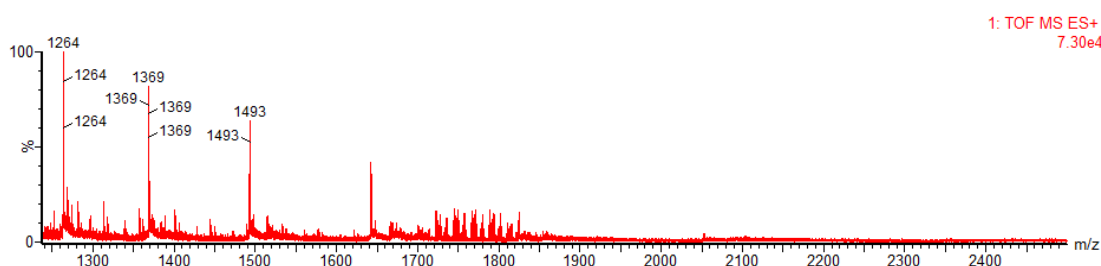

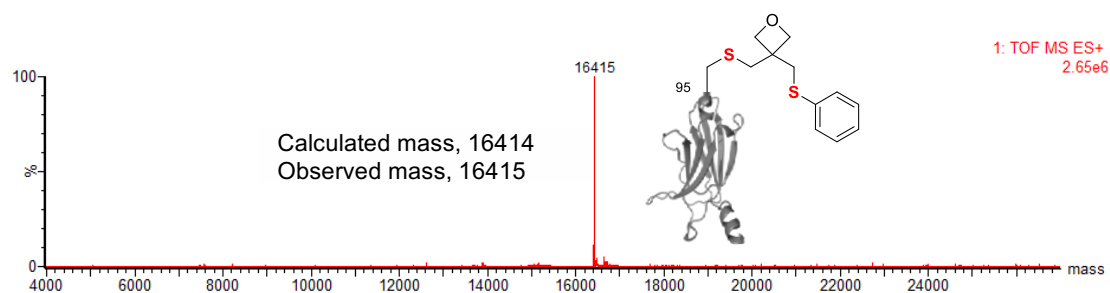

**Figure S35.** ESI-MS of the incubation of C2Am-PhSCH<sub>2</sub>-S-Ox (**7c**) with 20 mM GSH

### Reaction of C2Am with 3-(bromomethyl)oxetane (**9**)

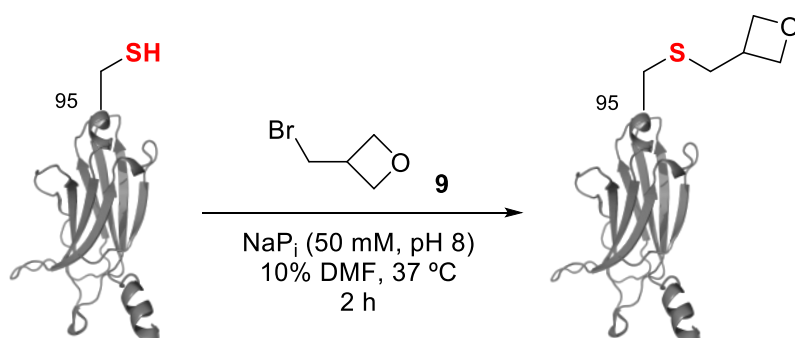

Tris(2-carboxyethyl)phosphine hydrochloride (TCEP·HCl) (5  $\mu$ L of a 9 mg/mL stock solution in H<sub>2</sub>O, 154.1 nmol) was added to a solution of C2Am (25  $\mu$ L, 1 mg/mL, 1.54 nmol) in 50 mM sodium phosphate buffer at pH 8 and the resulting mixture shaken at room temperature for 2 h. C2Am was prepared as a *ca.* 0.25 mg/mL solution in 50 mM sodium phosphate buffer at pH 8 and 50  $\mu$ L (0.77 nmol) were transferred to a 0.5 mL eppendorf tube. 3-(Bromomethyl)oxetane (**9**) (0.20 mg, 1.16  $\mu$ mol) in DMF (6  $\mu$ L) was added and the resulting mixture vortexed for 30 seconds. After 2 h of additional shaking at 37  $^{\circ}$ C, a 3  $\mu$ L aliquot was analyzed by LC-MS (3  $\mu$ L aliquot diluted by 7  $\mu$ L of 50 mM sodium phosphate buffer at pH 8) and complete conversion to C2Am-SCH<sub>2</sub>-Ox (**10**) (calculated mass, 16292; observed mass, 16295) was observed. Small molecules were removed from the reaction mixture by loading the sample onto a Zeba<sup>TM</sup> Spin desalting column (ThermoFisher Scientific) previously equilibrated with PBS buffer at pH 7.6. The sample was eluted by centrifugation (2 min, 1500xg). The protein sample (0.25 mg/mL by Bradford assay) was flash frozen with liquid nitrogen and stored at  $-20$   $^{\circ}$ C.

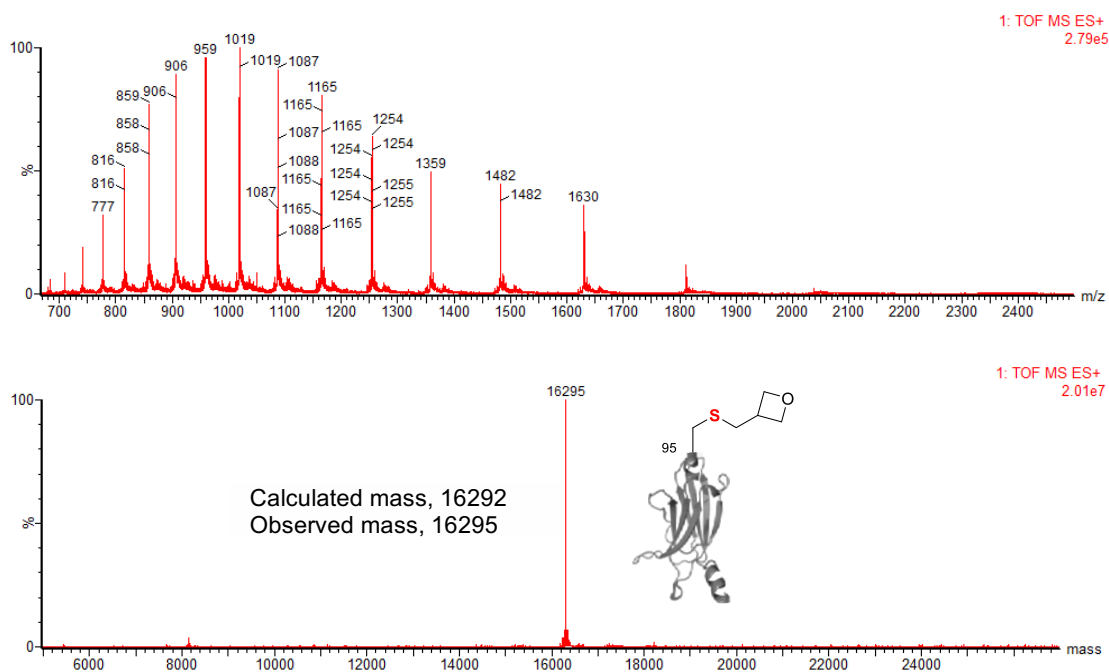

**Figure S36.** ESI-MS of the reaction of C2Am with 3-(bromomethyl)oxetane (**9**)

**Control: incubation of C2Am-SCH<sub>2</sub>-Ox (**10**) with Ellman's reagent**

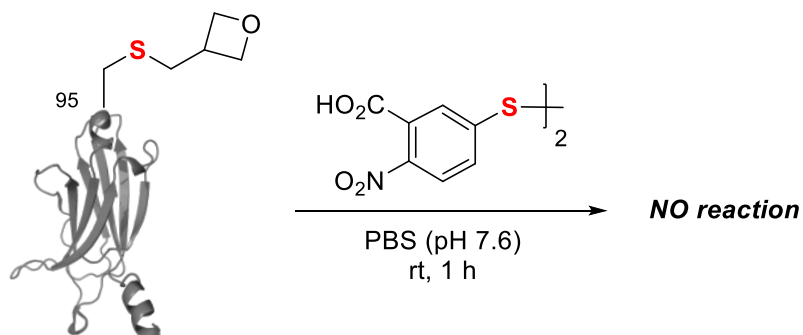

All manipulations were carried out at room temperature. A 10  $\mu$ L aliquot of C2Am-SCH<sub>2</sub>-Ox (**10**) (*ca.* 0.25 mg/mL, 0.153 nmol) in PBS buffer at pH 7.6 was transferred to a 0.5 mL eppendorf tube. Ellman's reagent (0.2  $\mu$ L of a 20 mg/mL stock solution in H<sub>2</sub>O, 10.09 nmol) was added and the resulting mixture vortexed for 30 seconds. After 1 h of additional shaking, a 3  $\mu$ L aliquot was analyzed by LC-MS (3  $\mu$ L aliquot diluted by 7  $\mu$ L of PBS buffer at pH 7.6) and starting protein (**10**) (calculated mass, 16292; observed mass, 16295) was detected unaltered.

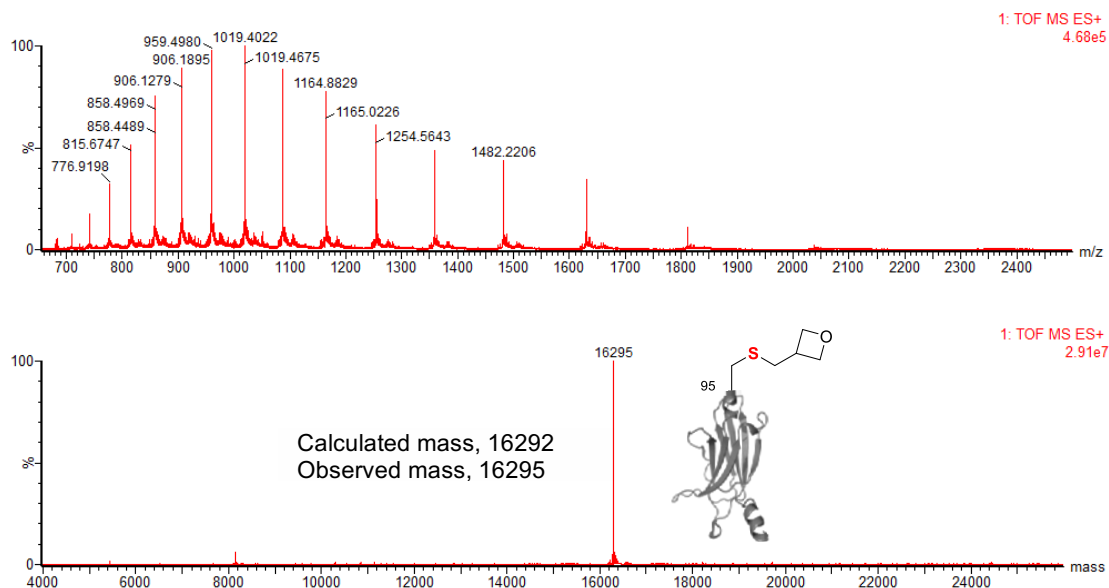

**Figure S37.** ESI-MS of the incubation of C2Am-SCH<sub>2</sub>-Ox (**10**) with Ellman's reagent

### Reaction of C2Am-SCH<sub>2</sub>-Ox (**10**) with BnNH<sub>2</sub>

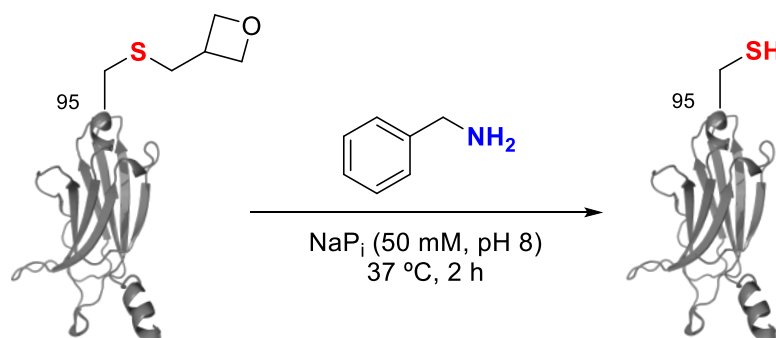

C2Am-SCH<sub>2</sub>-Ox (**10**) was prepared as a 0.25 mg/mL solution in 50 mM sodium phosphate buffer at pH 8 and 10  $\mu$ L (0.153 nmol) were transferred to a 0.5 mL eppendorf tube. BnNH<sub>2</sub> (2  $\mu$ L of an 8.2 mg/mL stock solution in H<sub>2</sub>O, 15.34  $\mu$ mol) was added at room temperature and the resulting mixture vortexed for 30 seconds. After 2 h of additional shaking at 37  $^{\circ}$ C, a 2  $\mu$ L aliquot was analyzed by LC-MS (2  $\mu$ L aliquot diluted by 8  $\mu$ L of 50 mM sodium phosphate buffer at pH 8) and complete conversion to C2Am (calculated mass, 16222; observed mass, 16222) was observed.

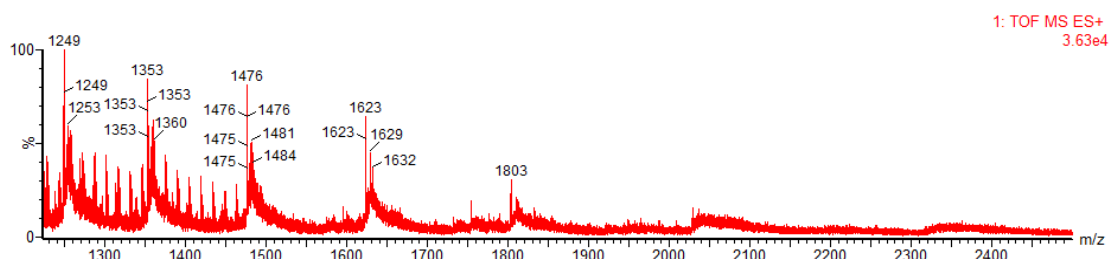

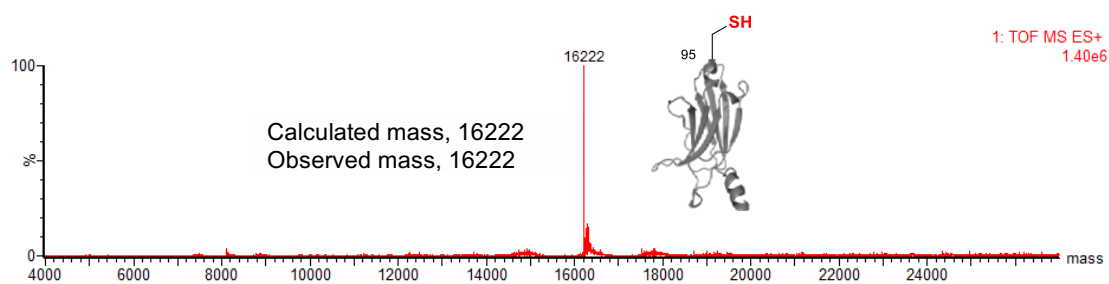

**Figure S38.** ESI-MS of the reaction of C2Am-SCH<sub>2</sub>-Ox (**10**) with BnNH<sub>2</sub>

*Control (incubation with Ellman's reagent):* to the above reaction mixture, Ellman's reagent (3  $\mu$ L of a 20 mg/mL stock solution in H<sub>2</sub>O, 151.35 nmol) was added at room temperature and the resulting mixture vortexed for 30 seconds. After 1 h of additional shaking at 37  $^{\circ}$ C, a 2  $\mu$ L aliquot was analyzed by LC-MS (2  $\mu$ L aliquot diluted by 8  $\mu$ L of 50 mM sodium phosphate buffer at pH 8) and complete conversion to the expected Ellman's product (calculated mass, 16419; observed mass, 16420) was observed.

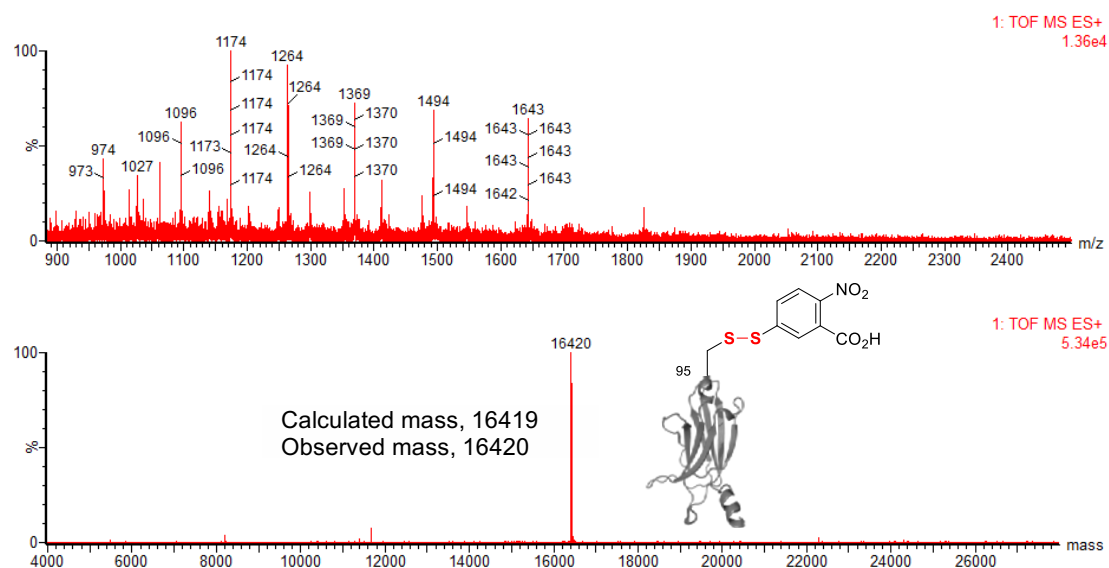

**Figure S39.** ESI-MS of the reaction of C2Am with Ellman's reagent

## Reaction of C2Am-SCH<sub>2</sub>-Ox (**10**) with BME

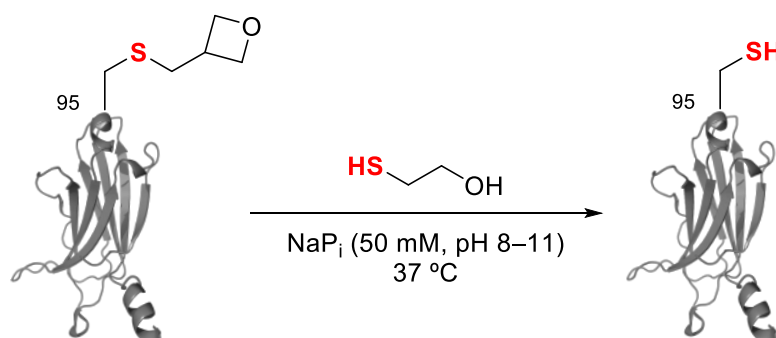

C2Am-SCH<sub>2</sub>-Ox (**10**) was prepared as a 0.25 mg/mL solution in 50 mM sodium phosphate buffer at pH 8 and 10  $\mu$ L (0.153 nmol) were transferred to a 0.5 mL eppendorf tube. BME (0.11  $\mu$ L, 1.53  $\mu$ mol) was added at room temperature and the resulting mixture vortexed for 30 seconds. After 22 h of additional shaking at 37  $^{\circ}$ C, a 2  $\mu$ L aliquot was analyzed by LC-MS (2  $\mu$ L aliquot diluted by 8  $\mu$ L of 50 mM sodium phosphate buffer at pH 8) and 50% conversion to C2Am (calculated mass, 16222; observed mass, 16222) together with 50% conversion to the corresponding mixed BME disulfide (calculated mass, 16298; observed mass, 16298) was observed.

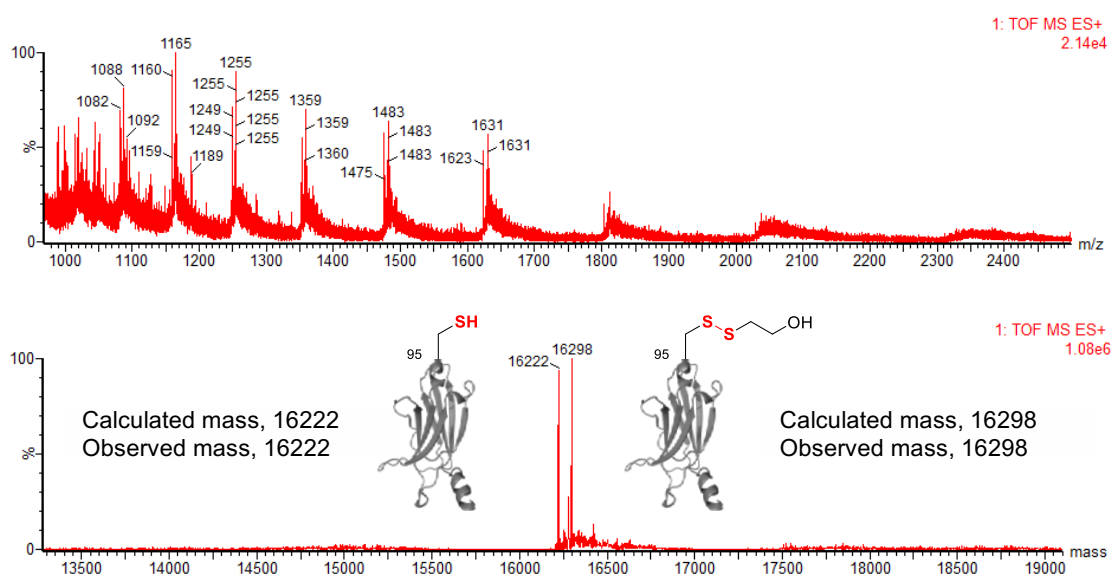

**Figure S40.** ESI-MS of the reaction of C2Am-SCH<sub>2</sub>-Ox (**10**) with BME (pH 8)

C2Am-SCH<sub>2</sub>-Ox (**10**) was prepared as a 0.25 mg/mL solution in 50 mM sodium phosphate buffer at pH 11 and 10  $\mu$ L (0.153 nmol) were transferred to a 0.5 mL eppendorf tube. BME (0.11  $\mu$ L, 1.53  $\mu$ mol) was added at room temperature and the resulting mixture vortexed for 30 seconds. After 4 h of additional shaking at 37  $^{\circ}$ C, a 2  $\mu$ L aliquot was analyzed by LC-MS (2  $\mu$ L aliquot diluted by 8  $\mu$ L of 50 mM

sodium phosphate buffer at pH 11) complete conversion to the corresponding mixed BME disulfide (calculated mass, 16298; observed mass, 16298) was observed.

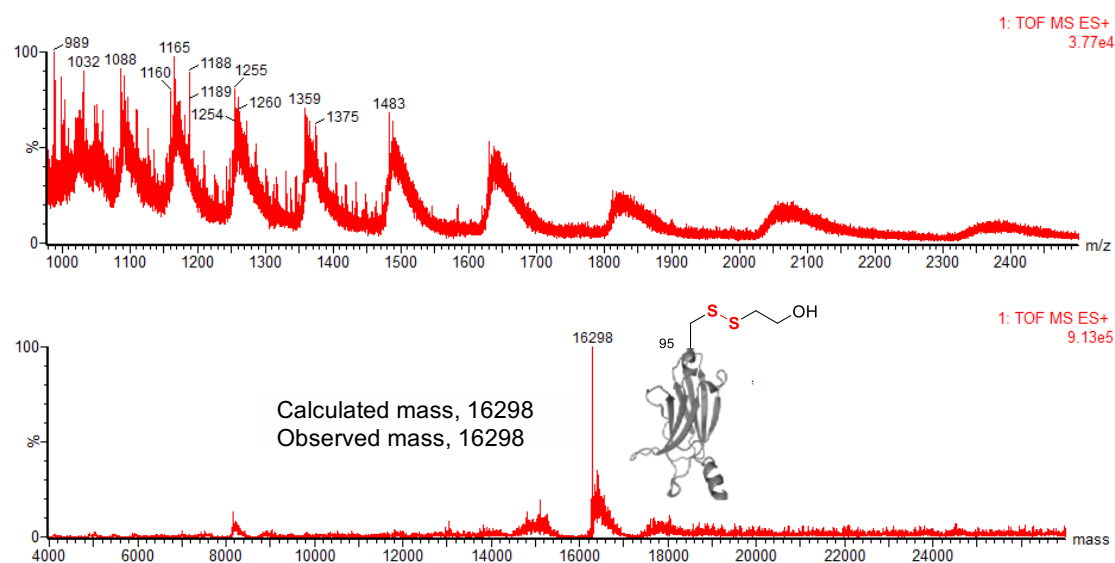

**Figure S41.** ESI-MS of the reaction of C2Am-SCH<sub>2</sub>-Ox (**10**) with BME (pH 11)

#### Reaction of C2Am-SCH<sub>2</sub>-Ox (**10**) with PhSH

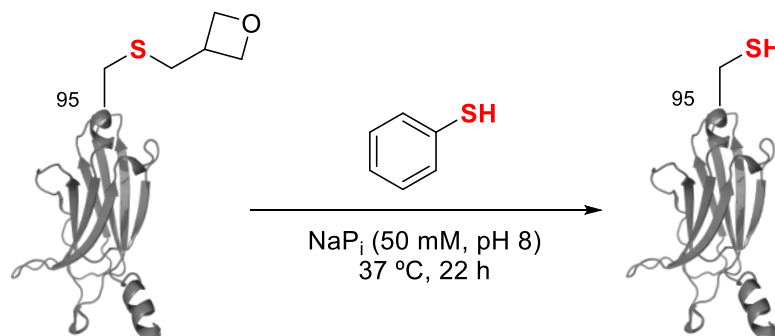

C2Am-SCH<sub>2</sub>-Ox (**10**) was prepared as a 0.25 mg/mL solution in 50 mM sodium phosphate buffer at pH 8 and 10  $\mu$ L (0.153 nmol) were transferred to a 0.5 mL eppendorf tube. PhSH (0.16  $\mu$ L, 1.53  $\mu$ mol) was added at room temperature and the resulting mixture vortexed for 30 seconds. After 22 h of additional shaking at 37  $^{\circ}$ C, a 2  $\mu$ L aliquot was analyzed by LC-MS (2  $\mu$ L aliquot diluted by 8  $\mu$ L of 50 mM sodium phosphate buffer at pH 8) and complete conversion to C2Am (calculated mass, 16222; observed mass, 16222) was observed.

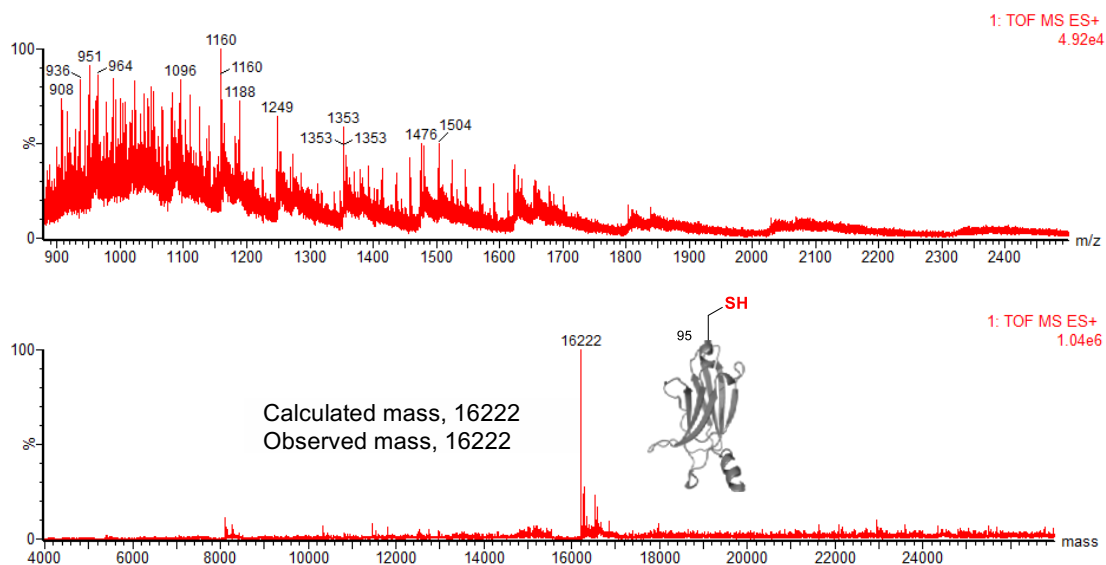

**Figure S42.** ESI-MS of the reaction of C2Am-SCH<sub>2</sub>-Ox (**10**) with PhSH

*Control (incubation with Ellman's reagent):* to the above reaction mixture, Ellman's reagent (3  $\mu$ L of a 20 mg/mL stock solution in H<sub>2</sub>O, 151.35 nmol) was added at room temperature and the resulting mixture vortexed for 30 seconds. After 1 h of additional shaking at 37  $^{\circ}$ C, a 2  $\mu$ L aliquot was analyzed by LC-MS (2  $\mu$ L aliquot diluted by 8  $\mu$ L of 50 mM sodium phosphate buffer at pH 8) and complete conversion to the expected Ellman's product (calculated mass, 16419; observed mass, 16420) was observed.

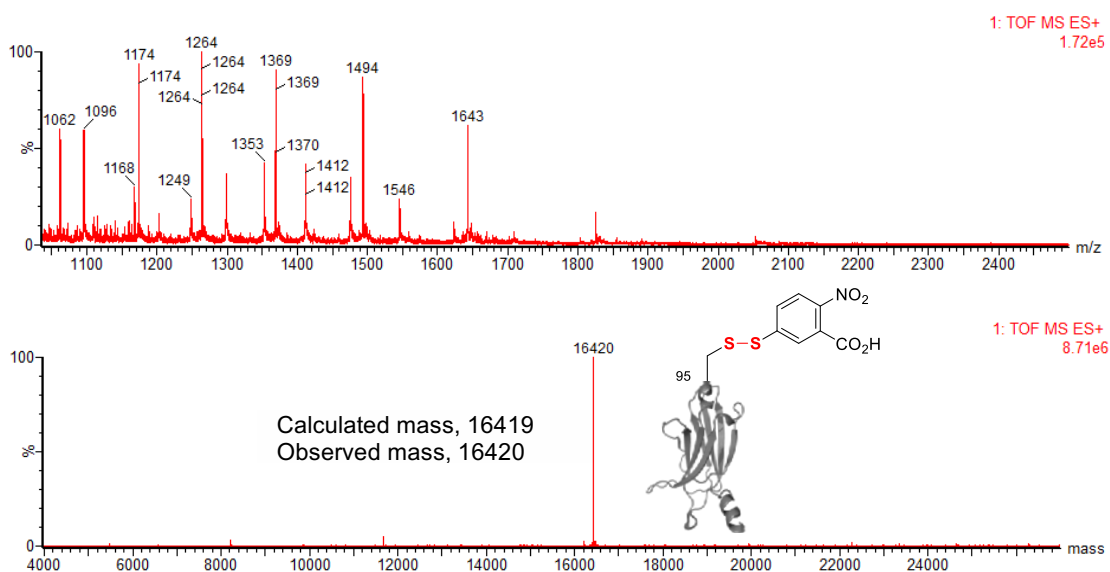

**Figure S43.** ESI-MS of the reaction of C2Am with Ellman's reagent



## Reaction of C2Am-SCH<sub>2</sub>-Ox (10) with βGalSNa

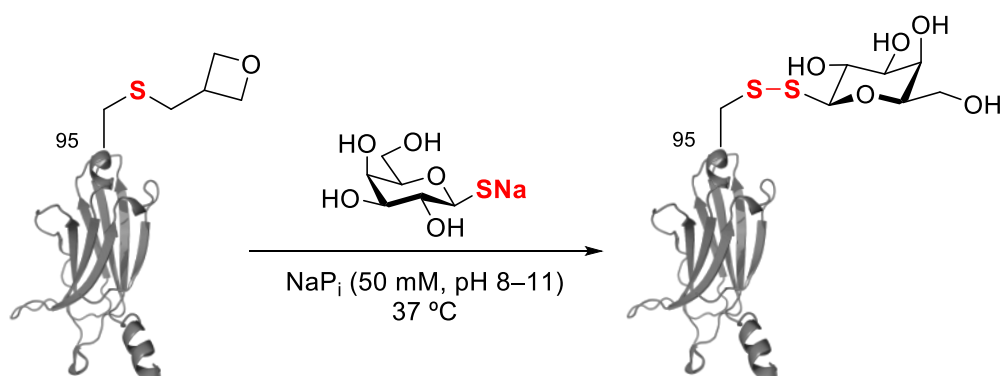

C2Am-SCH<sub>2</sub>-Ox (**10**) was prepared as a 0.25 mg/mL solution in 50 mM sodium phosphate buffer at pH 8 and 10  $\mu$ L (0.153 nmol) were transferred to a 0.5 mL eppendorf tube.  $\beta$ GalSNa (0.33 mg, 1.53  $\mu$ mol) was added at room temperature and the resulting mixture vortexed for 30 seconds. After 5 h of additional shaking at 37  $^{\circ}$ C, a 2  $\mu$ L aliquot was analyzed by LC-MS (2  $\mu$ L aliquot diluted by 8  $\mu$ L of 50 mM sodium phosphate buffer at pH 8) and complete conversion to the corresponding mixed  $\beta$ Gal disulfide (calculated mass, 16416; observed mass, 16417) was observed.

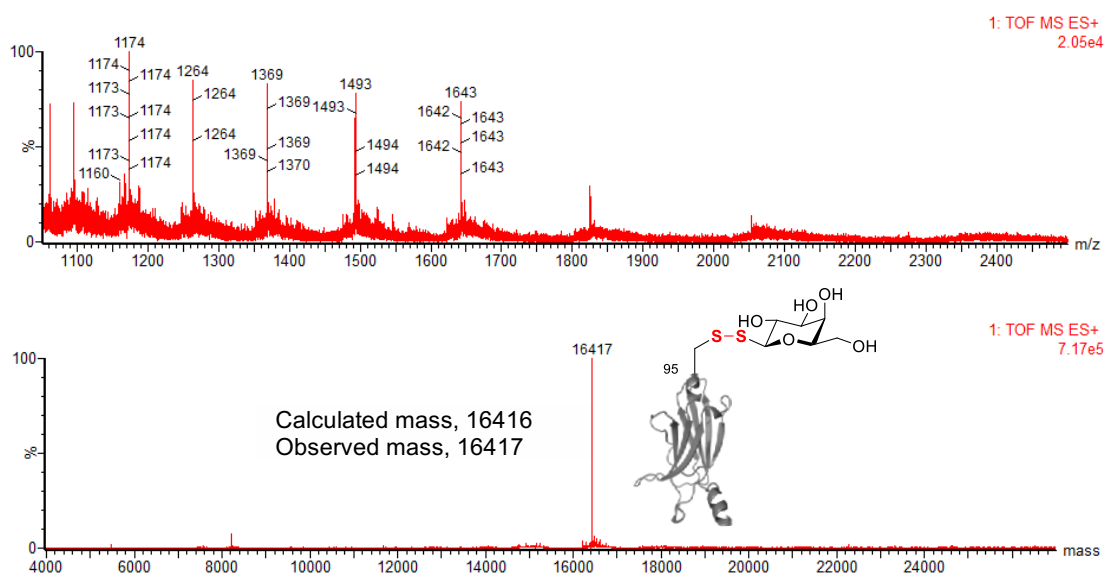

**Figure S44.** ESI-MS of the reaction of C2Am-SCH<sub>2</sub>-Ox (**10**) with  $\beta$ GalSNa (pH 8)

C2Am-SCH<sub>2</sub>-Ox (**10**) was prepared as a 0.25 mg/mL solution in 50 mM sodium phosphate buffer at pH 11 and 10  $\mu$ L (0.153 nmol) were transferred to a 0.5 mL eppendorf tube.  $\beta$ GalSNa (0.33 mg, 1.53  $\mu$ mol) was added at room temperature and the resulting mixture vortexed for 30 seconds. After 2 h of additional shaking at 37  $^{\circ}$ C, a 2  $\mu$ L aliquot was analyzed by LC-MS (2  $\mu$ L aliquot diluted by 8  $\mu$ L of 50 mM

sodium phosphate buffer at pH 11) and complete conversion to the corresponding mixed  $\beta$ Gal disulfide (calculated mass, 16416; observed mass, 16417) was observed.

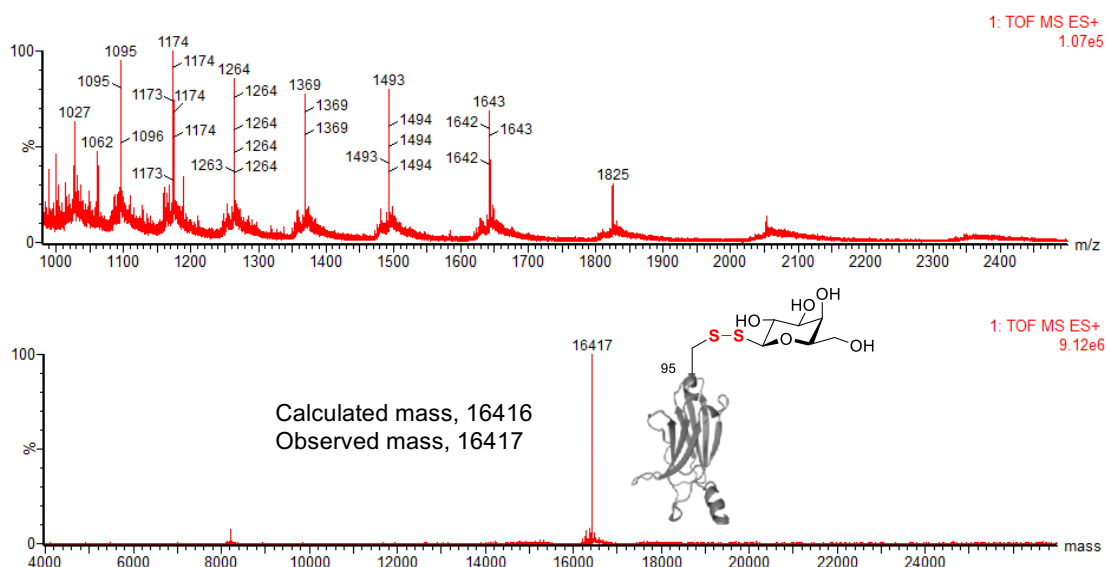

**Figure S45.** ESI-MS of the reaction of C2Am-SCH<sub>2</sub>-Ox (**10**) with  $\beta$ GalSNa (pH 11)

*Control (incubation with TCEP-HCl):* to the above reaction mixture, TCEP-HCl (2  $\mu$ L of an 11 mg/mL stock solution in H<sub>2</sub>O, 678.0 nmol) was added at room temperature and the resulting mixture vortexed for 30 seconds. After 1 h of additional shaking at 37  $^{\circ}$ C, a 2  $\mu$ L aliquot was analyzed by LC-MS (2  $\mu$ L aliquot diluted by 8  $\mu$ L of 50 mM sodium phosphate buffer at pH 8) and complete conversion to C2Am (calculated mass, 16222; observed mass, 16223) was observed.

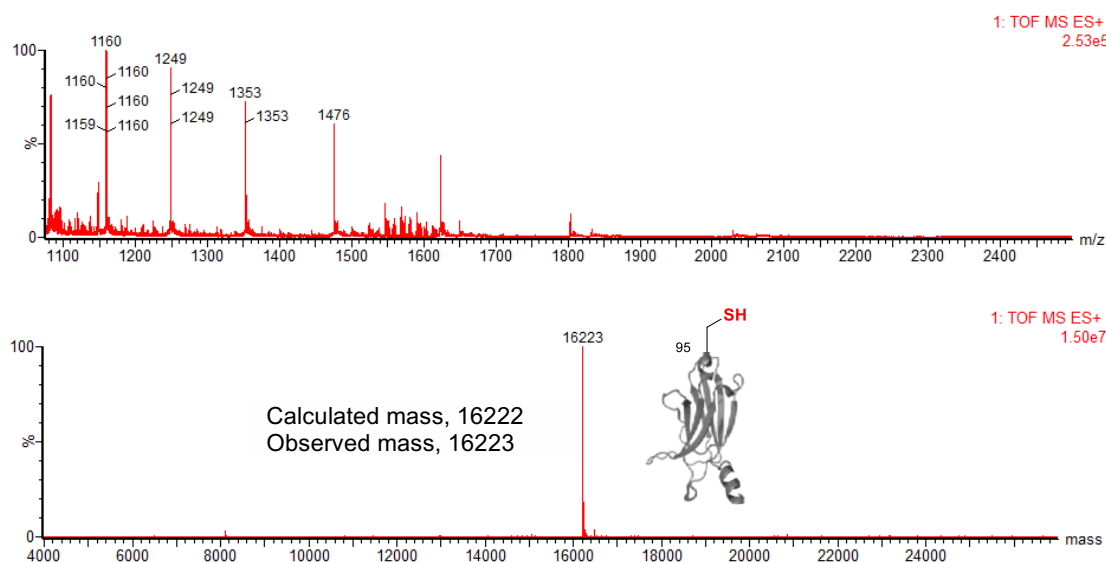

**Figure S46.** ESI-MS of the reaction of mixed  $\beta$ Gal disulfide with TCEP-HCl

### Reaction of C2Am-SCH<sub>2</sub>-Ox (10) with TCEP·HCl

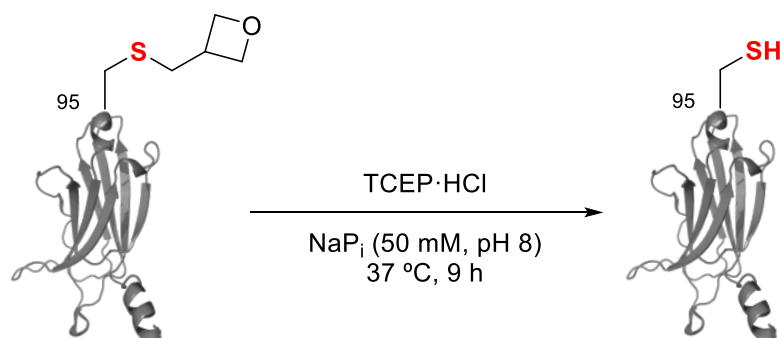

C2Am-SCH<sub>2</sub>-Ox (10) was prepared as a 0.25 mg/mL solution in 50 mM sodium phosphate buffer at pH 8 and 10  $\mu$ L (0.153 nmol) were transferred to a 0.5 mL eppendorf tube. TCEP·HCl (2  $\mu$ L of an 11 mg/mL stock solution in H<sub>2</sub>O, 678.0 nmol) was added at room temperature and the resulting mixture vortexed for 30 seconds. After 9 h of additional shaking at 37 °C, a 2  $\mu$ L aliquot was analyzed by LC-MS (2  $\mu$ L aliquot diluted by 8  $\mu$ L of 50 mM sodium phosphate buffer at pH 8) and complete conversion to C2Am (calculated mass, 16222; observed mass, 16223) was observed.

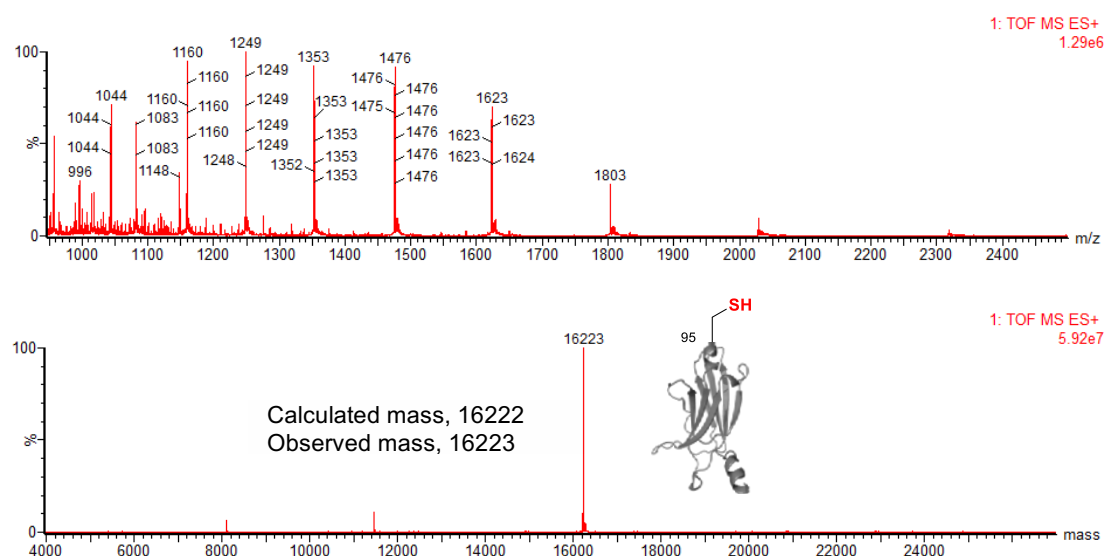

**Figure S47.** ESI-MS of the reaction of C2Am-SCH<sub>2</sub>-Ox (10) with TCEP·HCl

**Control: reaction of C2Am-Sac (S2) with BnNH<sub>2</sub>**

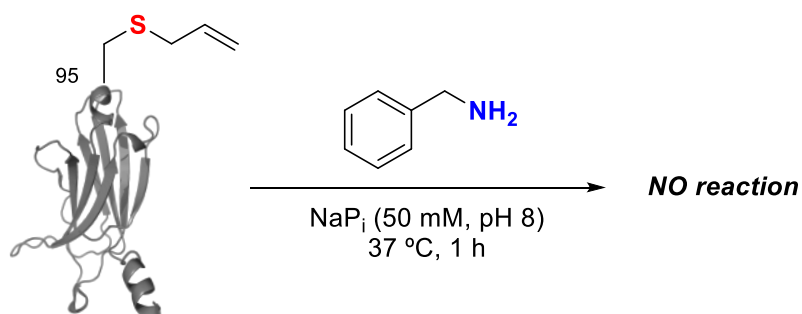

C2Am-Sac (S2)<sup>[11]</sup> was prepared as a 0.25 mg/mL solution in 50 mM sodium phosphate buffer at pH 8 and 10  $\mu$ L (0.198 nmol) were transferred to a 0.5 mL eppendorf tube. BnNH<sub>2</sub> (2  $\mu$ L of a 10.6 mg/mL stock solution in H<sub>2</sub>O, 198.1  $\mu$ mol) was added at room temperature and the resulting mixture vortexed for 30 seconds. After 1 h of additional shaking at 37 °C, a 2  $\mu$ L aliquot was analyzed by LC-MS (2  $\mu$ L aliquot diluted by 8  $\mu$ L of 50 mM sodium phosphate buffer at pH 8) and starting protein (S2) (calculated mass, 16262; observed mass, 16263) was detected unaltered.

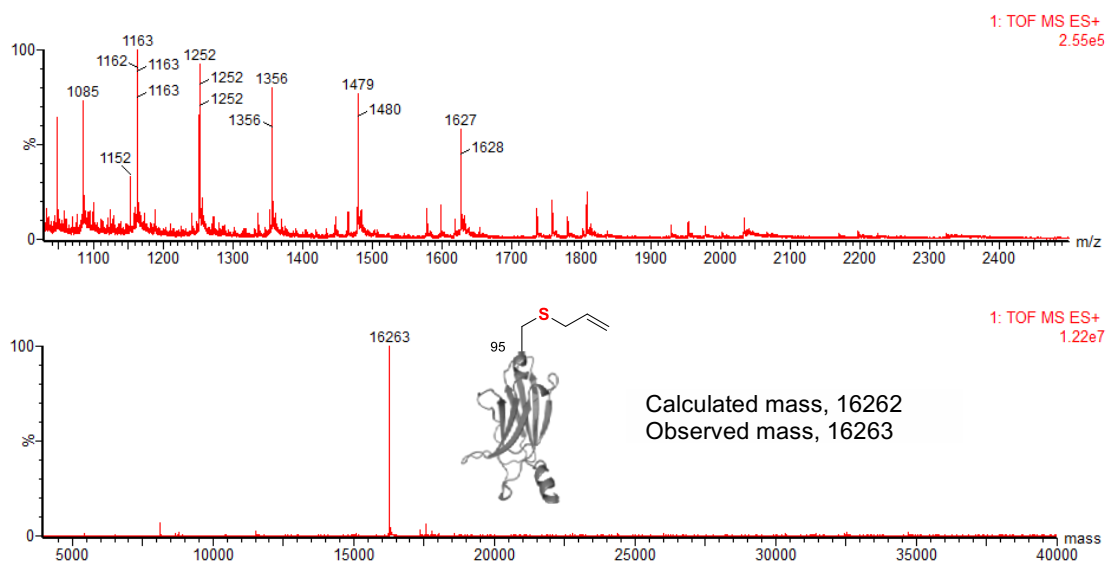

**Figure S48.** ESI-MS of the reaction of C2Am-Sac (S2) with BnNH<sub>2</sub>

### Control: reaction of C2Am-Sac (S2) with $\beta$ GalSNa

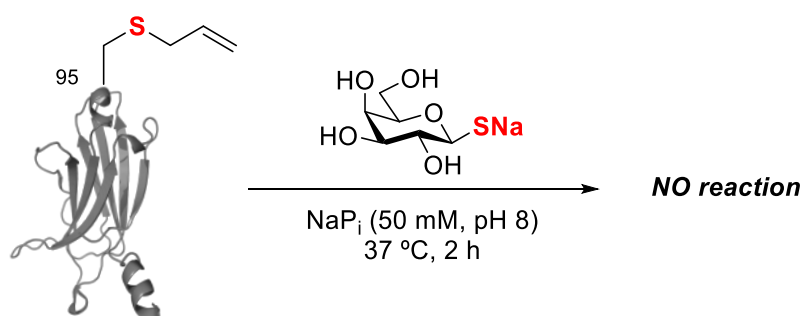

C2Am-Sac (S2)<sup>[11]</sup> was prepared as a 0.25 mg/mL solution in 50 mM sodium phosphate buffer at pH 8 and 10  $\mu$ L (0.198 nmol) were transferred to a 0.5 mL eppendorf tube.  $\beta$ GalSNa (2  $\mu$ L of a 0.6 mg stock solution in 277.8  $\mu$ L H<sub>2</sub>O, 198.1  $\mu$ mol) was added at room temperature and the resulting mixture vortexed for 30 seconds. After 2 h of additional shaking at 37 °C, a 2  $\mu$ L aliquot was analyzed by LC-MS (2  $\mu$ L aliquot diluted by 8  $\mu$ L of 50 mM sodium phosphate buffer at pH 8) and starting protein (S2) (calculated mass, 16262; observed mass, 16262) was detected unaltered.

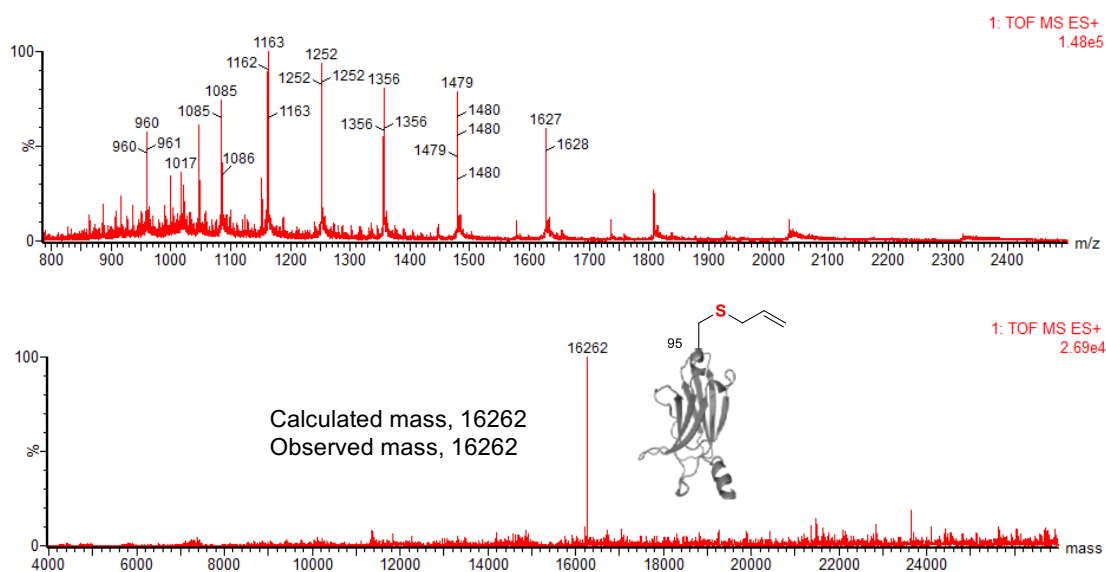

**Figure S49.** ESI-MS of the reaction of C2Am-Sac (S2) with  $\beta$ GalSNa

## Annexin-V (AnxV)<sup>[12,13]</sup>

### Sequence of AnxV C315 (modified residue highlighted)

AQVLRGTVTDFPGFDERADAETLRKAMKGLGTDEESILTLLTSRSNAQRQEISAAFKT  
LFRDLLDDLKSELTGKFEKLIVALMKPSRLYDAYELKHALKGAGTNEKVLTEIIASR  
TPEELRAIKQVYEEEEYGSSLEDDVVGDTSGYYQRMLVLLQANRDPDAGIDEAQVE  
QDAQALFQAGELKWTDEEKFITIFGTRSVSHLRKVFDKYMTISGFQIEETIDRETSGN  
LEQLLAVVKSIRSIPAYLAETLYYAMKGAGTDDHTLIRVMVSRSEIDLFNIRKEFRK  
NFATSLYSMIKGDTSGDYKKALLLLC GEDD

Calculated average isotopic mass = 35805.58 Da (*N*-terminal Met cleaved)

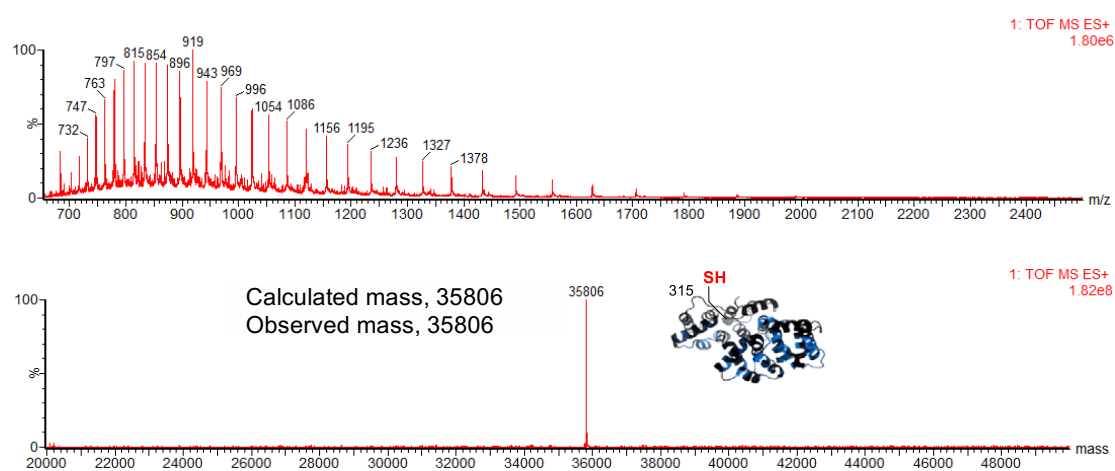

Figure S50. ESI-MS spectrum of AnxV

### Control: reaction of AnxV with Ellman's reagent

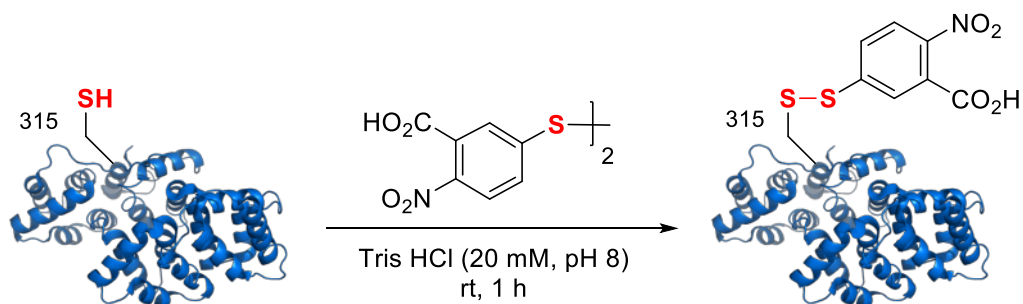

All manipulations were carried out at room temperature. A 10  $\mu$ L aliquot of AnxV (1 mg/mL, 0.616 nmol) in 20 mM Tris HCl buffer at pH 8 was transferred to a 0.5 mL eppendorf tube. Ellman's reagent (2  $\mu$ L of a 14 mg/mL stock solution in H<sub>2</sub>O, 70.65 nmol) was added and the resulting mixture vortexed for 30 seconds. After 1 h of additional shaking, a 3  $\mu$ L aliquot was analyzed by LC-MS (3  $\mu$ L aliquot diluted by 7

$\mu\text{L}$  of 20 mM Tris HCl buffer at pH 8) and complete conversion to the expected Ellman's product (calculated mass, 36003; observed mass, 36003) was observed.

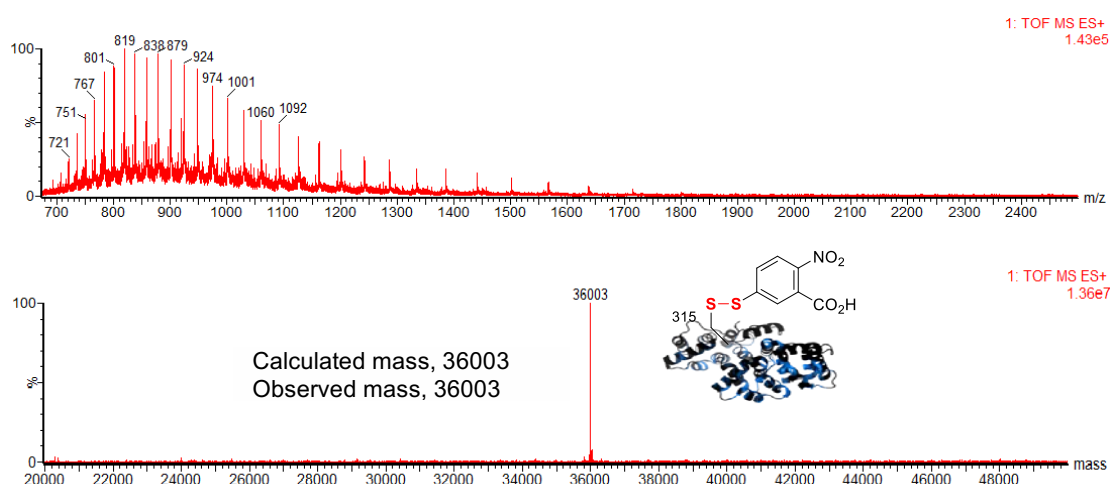

**Figure S51.** ESI-MS of the reaction of AnxV with Ellman's reagent

### Reaction of AnxV with 3-bromooxetane (**1**)

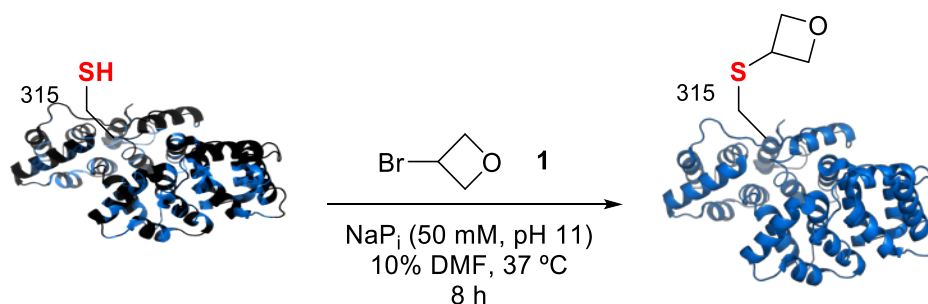

AnxV was prepared as a 0.25 mg/mL solution in 50 mM sodium phosphate buffer at pH 11 and 15  $\mu\text{L}$  (0.105 nmol) were transferred to a 0.5 mL eppendorf tube. 3-Bromooxetane (**1**) (1.5  $\mu\text{L}$  of a 0.8 mg stock solution in 158  $\mu\text{L}$  DMF, 52.4 nmol) was added and the resulting mixture vortexed for 30 seconds. After 8 h of additional shaking, a 3  $\mu\text{L}$  aliquot was analyzed by LC-MS (3  $\mu\text{L}$  aliquot diluted by 7  $\mu\text{L}$  of 50 mM sodium phosphate buffer at pH 11) and complete conversion to AnxV-3-S-Ox (**3**) (calculated mass, 35862; observed mass, 35859) was observed. Small molecules were removed from the reaction mixture by loading the sample onto a Zeba™ Spin desalting column (ThermoFisher Scientific) previously equilibrated with PBS buffer at pH 7.6. The sample was eluted by centrifugation (2 min, 1500xg). The protein sample (0.16 mg/mL by Bradford assay) was flash frozen with liquid nitrogen and stored at  $-20\text{ }^{\circ}\text{C}$ .

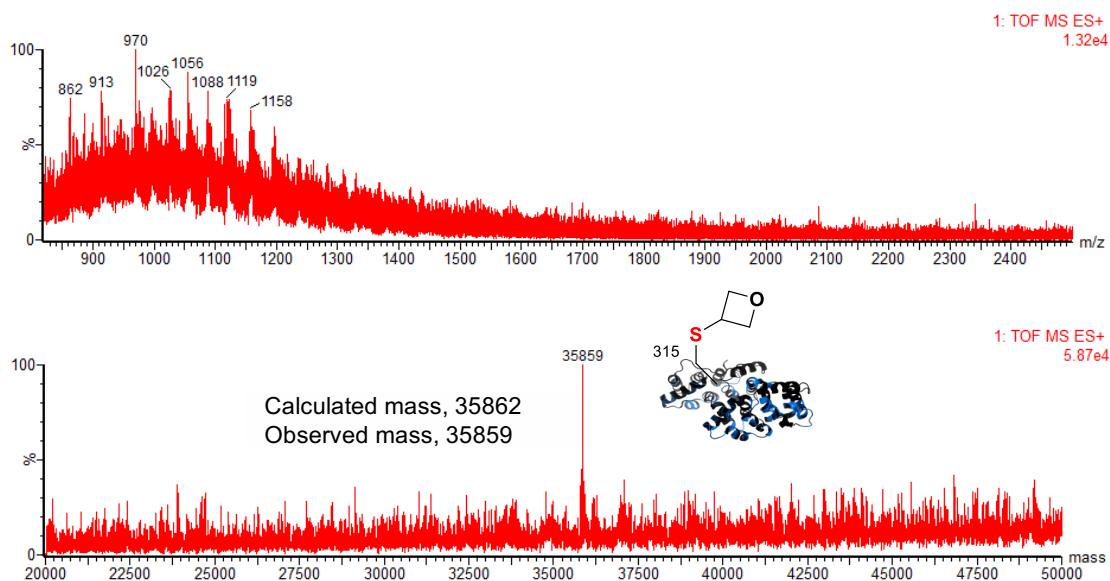

**Figure S52.** ESI-MS of the reaction of AnxV with 3-bromooxetane (**1**)

**Control: incubation of AnxV-3-S-Ox (**3**) with Ellman's reagent**

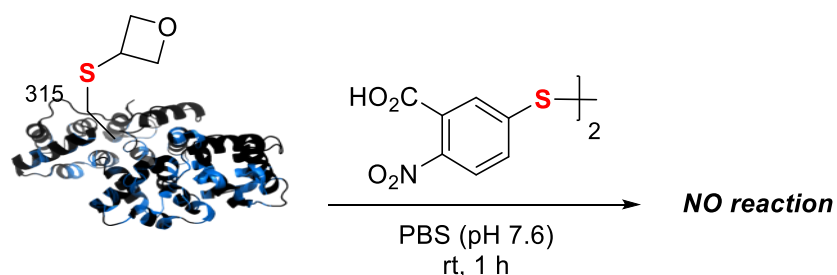

All manipulations were carried out at room temperature. A 10  $\mu\text{L}$  aliquot of AnxV-3-S-Ox (**3**) (*ca.* 0.16 mg/mL, 0.045 nmol) in PBS buffer at pH 7.6 was transferred to a 0.5 mL eppendorf tube. Ellman's reagent (0.5  $\mu\text{L}$  of a 14 mg/mL stock solution in  $\text{H}_2\text{O}$ , 17.66 nmol) was added and the resulting mixture vortexed for 30 seconds. After 1 h of additional shaking, a 5  $\mu\text{L}$  aliquot was analyzed by LC-MS (5  $\mu\text{L}$  aliquot diluted by 5  $\mu\text{L}$  of PBS buffer at pH 7.6) and starting protein (**3**) (calculated mass, 35862; observed mass, 35859) was detected unaltered.

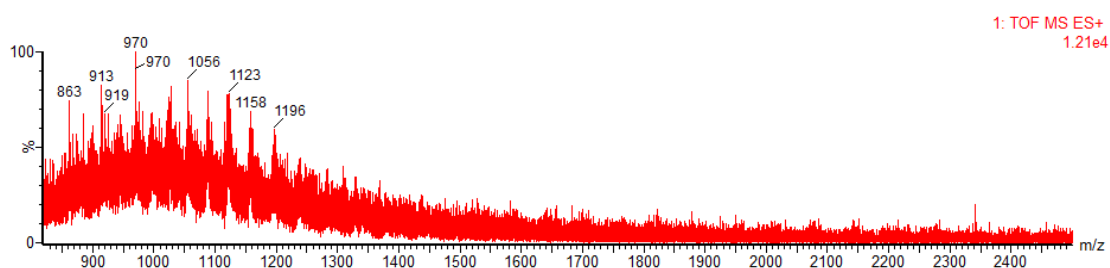



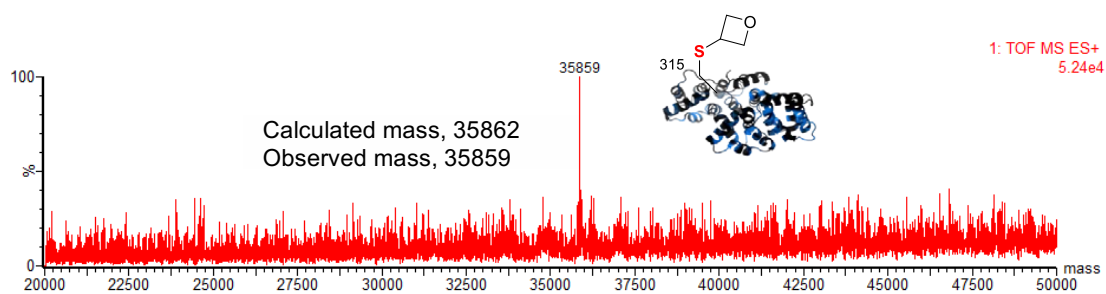

**Figure S53.** ESI-MS of the incubation of AnxV-3-S-Ox (**3**) with Ellman's reagent

**Reaction of AnxV with 3,3-bis(bromomethyl)oxetane (**4**)**

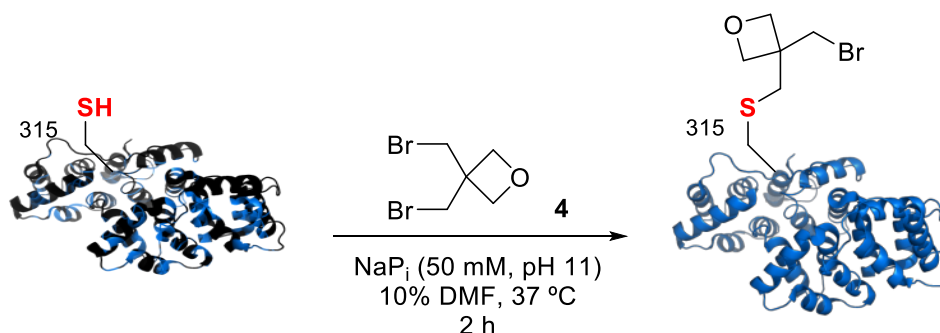

AnxV was prepared as a 0.25 mg/mL solution in 50 mM sodium phosphate buffer at pH 11 and 25  $\mu$ L (0.175 nmol) were transferred to a 0.5 mL eppendorf tube. 3,3-Bis(bromomethyl)oxetane (**4**) (0.27 mg, 1047.3 nmol) in DMF (3  $\mu$ L) was added and the resulting mixture vortexed for 30 seconds. After 2 h of additional shaking at 37  $^{\circ}$ C, a 3  $\mu$ L aliquot was analyzed by LC-MS (3  $\mu$ L aliquot diluted by 7  $\mu$ L of 50 mM sodium phosphate buffer at pH 11) and complete conversion to AnxV-BrCH<sub>2</sub>-S-Ox (**6**) (calculated mass, 35969; observed mass, 35967) was observed. Small molecules were removed from the reaction mixture by loading the sample onto a Zeba™ Spin desalting column (ThermoFisher Scientific) previously equilibrated with PBS buffer at pH 7.6. The sample was eluted by centrifugation (2 min, 1500xg). The protein sample (0.24 mg/mL by Bradford assay) was flash frozen with liquid nitrogen and stored at  $-20$   $^{\circ}$ C.

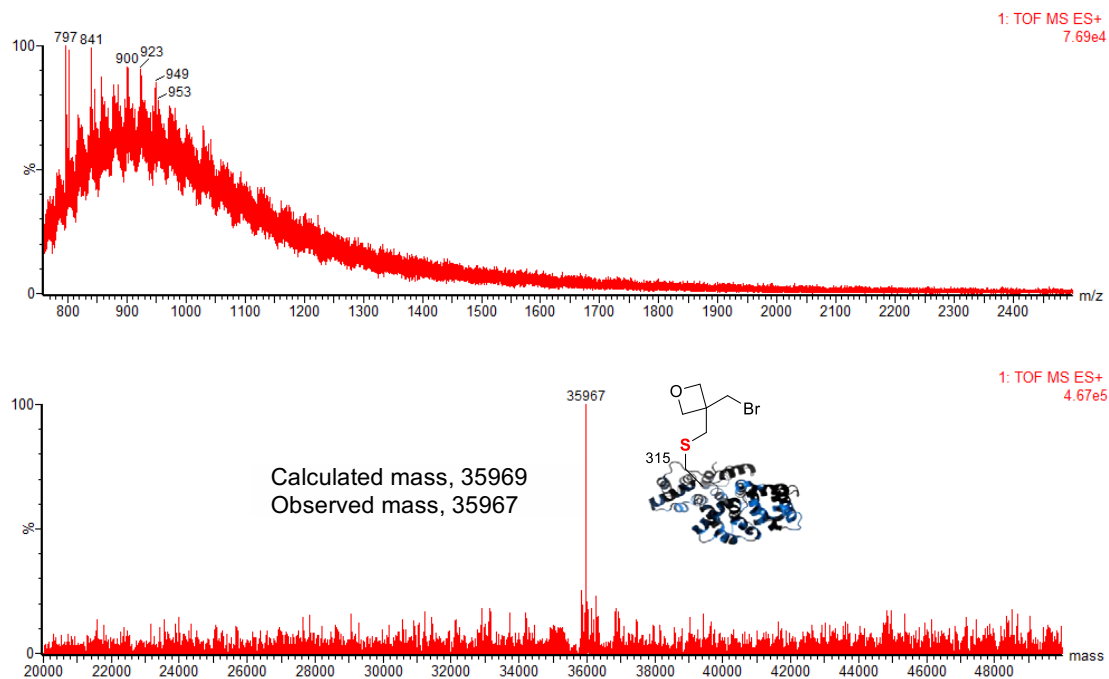

**Figure S54.** ESI-MS of the reaction of AnxV with 3,3-bis(bromomethyl)oxetane (4)

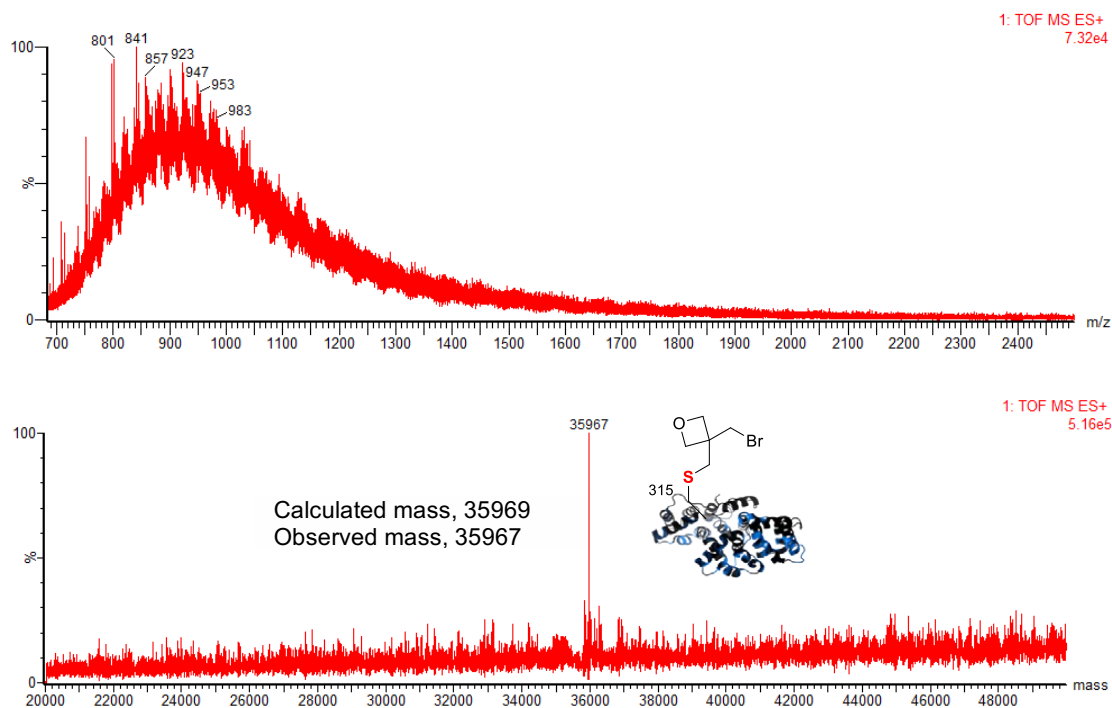

**Figure S55.** ESI-MS of AnxV-BrCH<sub>2</sub>-S-Ox (6) after storage at -20 °C for >9 months in PBS (pH 7.6)

**Control: incubation of AnxV-BrCH<sub>2</sub>-S-Ox (6) with Ellman's reagent**

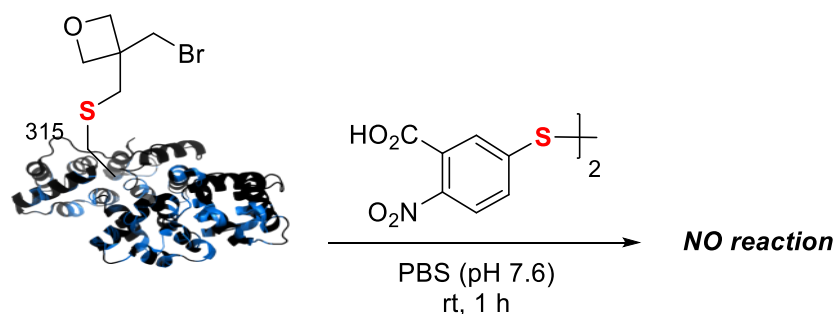

All manipulations were carried out at room temperature. A 10  $\mu\text{L}$  aliquot of AnxV-BrCH<sub>2</sub>-S-Ox (6) (*ca.* 0.24 mg/mL, 0.067 nmol) in PBS buffer at pH 7.6 was transferred to a 0.5 mL eppendorf tube. Ellman's reagent (1  $\mu\text{L}$  of a 14 mg/mL stock solution in H<sub>2</sub>O, 35.33 nmol) was added and the resulting mixture vortexed for 30 seconds. After 1 h of additional shaking, a 5  $\mu\text{L}$  aliquot was analyzed by LC-MS (5  $\mu\text{L}$  aliquot diluted by 5  $\mu\text{L}$  of PBS buffer at pH 7.6) and starting protein (6) (calculated mass, 35969; observed mass, 35969) was detected unaltered.

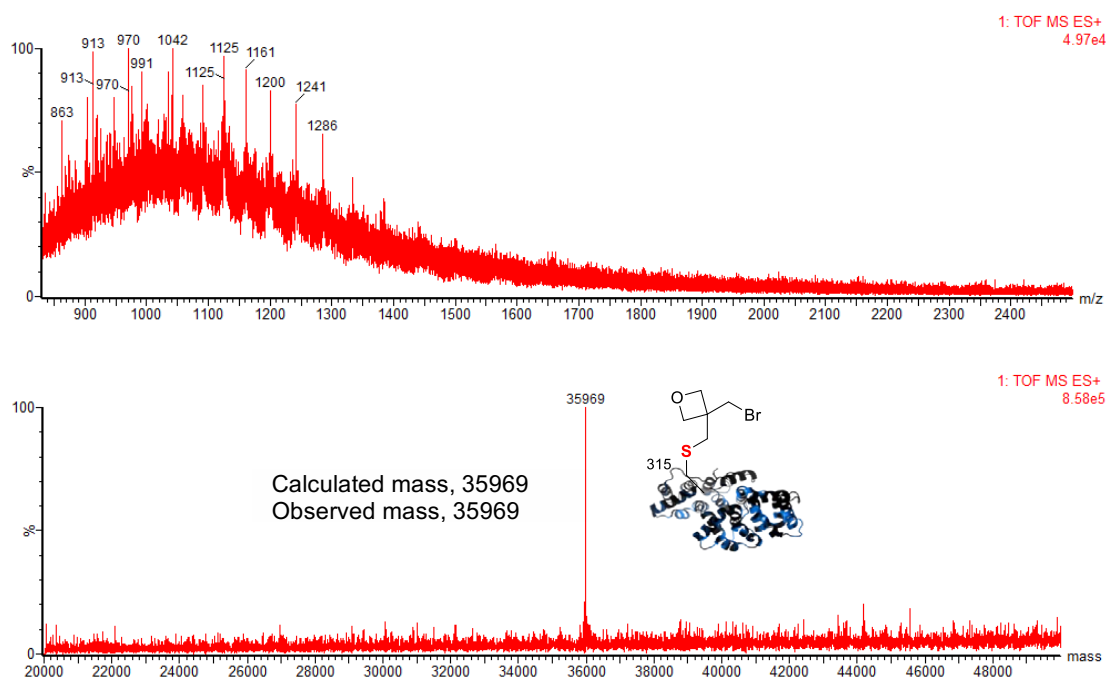

**Figure S56.** ESI-MS of the incubation of AnxV-BrCH<sub>2</sub>-S-Ox (6) with Ellman's reagent

## Reaction of AnxV with 3-(bromomethyl)oxetane (9)

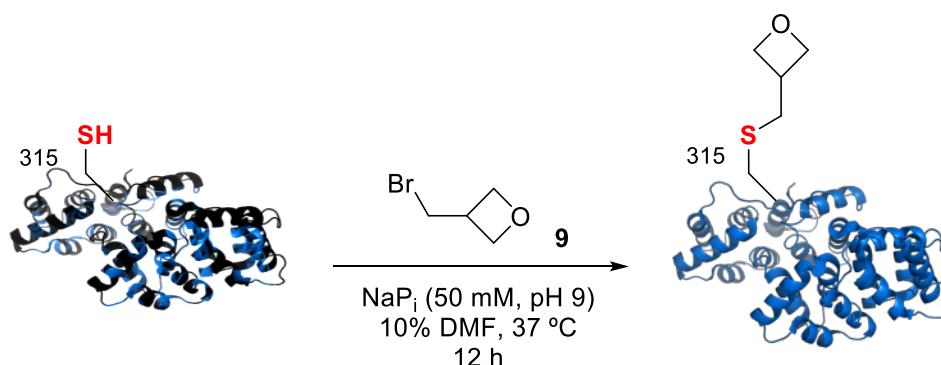

AnxV was prepared as a 0.25 mg/mL solution in 50 mM sodium phosphate buffer at pH 9 and 15  $\mu$ L (0.105 nmol) were transferred to a 0.5 mL eppendorf tube. 3-(Bromomethyl)oxetane (9) (1.5  $\mu$ L of a 0.4 mg stock solution in 723  $\mu$ L DMF, 5.2 nmol) was added and the resulting mixture vortexed for 30 seconds. After 12 h of additional shaking at 37 °C, a 3  $\mu$ L aliquot was analyzed by LC-MS (3  $\mu$ L aliquot diluted by 7  $\mu$ L of 50 mM sodium phosphate buffer at pH 9) and complete conversion to AnxV-SCH<sub>2</sub>-Ox (11) (calculated mass, 35876; observed mass, 35874) was observed. Small molecules were removed from the reaction mixture by loading the sample onto a Zeba™ Spin desalting column (ThermoFisher Scientific) previously equilibrated with PBS buffer at pH 7.6. The sample was eluted by centrifugation (2 min, 1500xg). The protein sample (0.24 mg/mL by Bradford assay) was flash frozen with liquid nitrogen and stored at -20 °C.

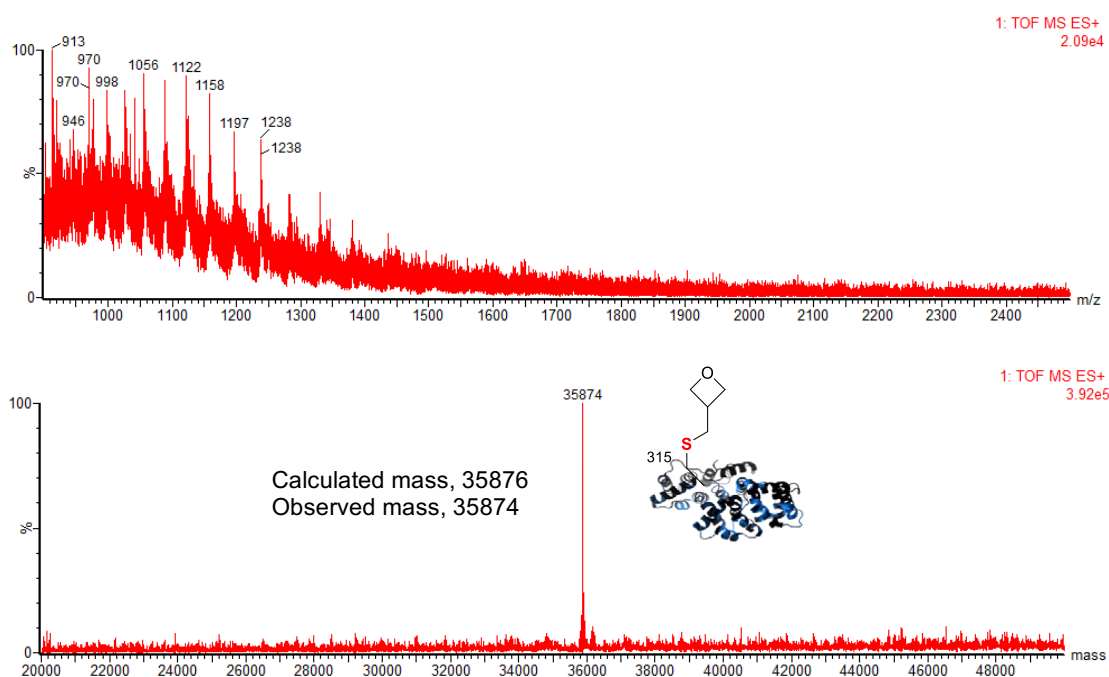

**Figure S57.** ESI-MS of the reaction of AnxV with 3-(bromomethyl)oxetane (9)

### Control: incubation of AnxV-SCH<sub>2</sub>-Ox (11) with Ellman's reagent

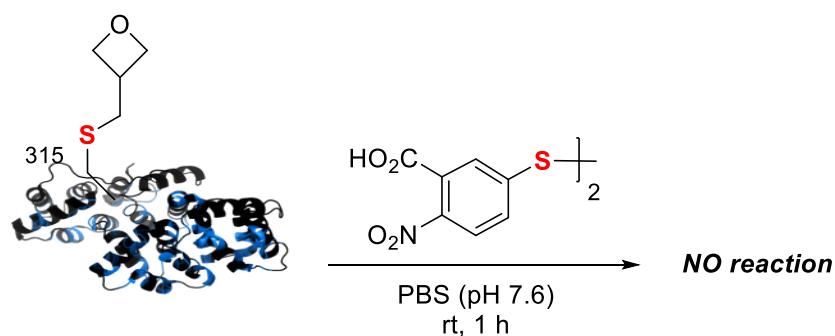

All manipulations were carried out at room temperature. A 10  $\mu$ L aliquot of AnxV-SCH<sub>2</sub>-Ox (**11**) (*ca.* 0.24 mg/mL, 0.067 nmol) in PBS buffer at pH 7.6 was transferred to a 0.5 mL eppendorf tube. Ellman's reagent (1  $\mu$ L of a 14 mg/mL stock solution in H<sub>2</sub>O, 35.33 nmol) was added and the resulting mixture vortexed for 30 seconds. After 1 h of additional shaking, a 5  $\mu$ L aliquot was analyzed by LC-MS (5  $\mu$ L aliquot diluted by 5  $\mu$ L of PBS buffer at pH 7.6) and starting protein (**11**) (calculated mass, 35876; observed mass, 35874) was detected unaltered.

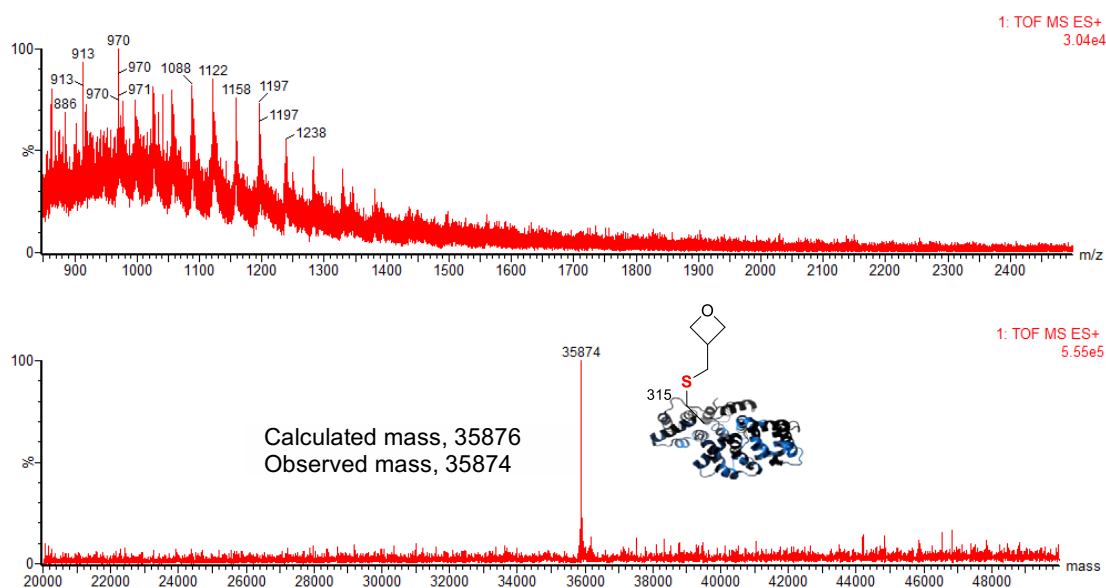

**Figure S58.** ESI-MS of the incubation of AnxV-SCH<sub>2</sub>-Ox (**11**) with Ellman's reagent

## Reaction of AnxV-SCH<sub>2</sub>-Ox (11) with βGalSNa

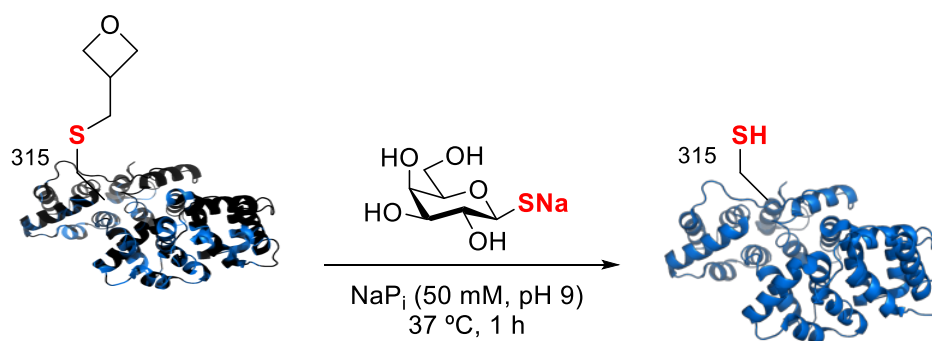

AnxV-SCH<sub>2</sub>-Ox (11) was prepared as a 0.25 mg/mL solution in 50 mM sodium phosphate buffer at pH 9 and 10 μL (0.070 nmol) were transferred to a 0.5 mL eppendorf tube. βGalSNa (2 μL of a 0.5 mg stock solution in 655 μL H<sub>2</sub>O, 7.0 nmol) was added at room temperature and the resulting mixture vortexed for 30 seconds. After 1 h of additional shaking at 37 °C, a 3 μL aliquot was analyzed by LC-MS (3 μL aliquot diluted by 7 μL of 50 mM sodium phosphate buffer at pH 9) and complete conversion to AnxV (calculated mass, 35806; observed mass, 35806) was observed.

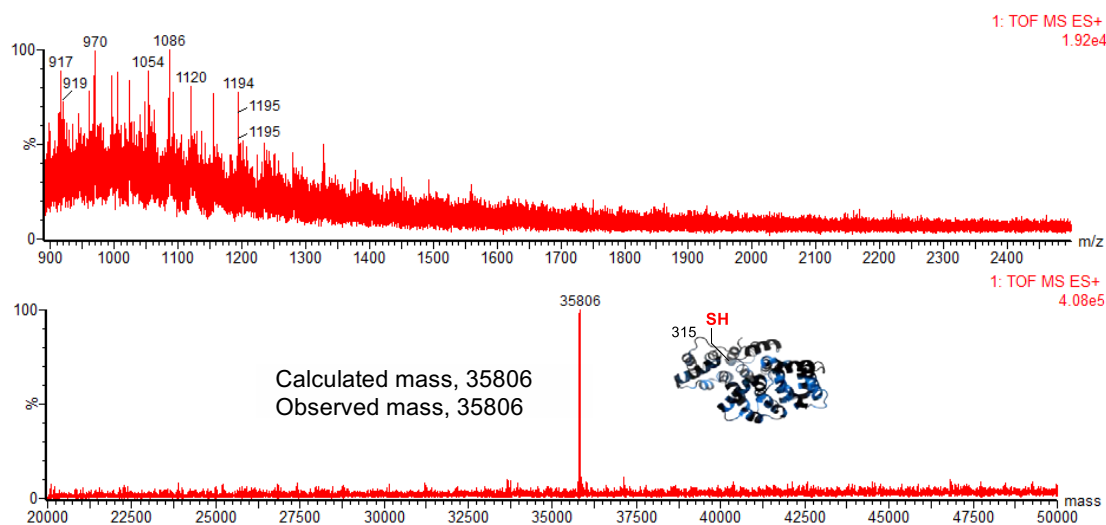

**Figure S59.** ESI-MS of the reaction of AnxV-SCH<sub>2</sub>-Ox (11) with βGalSNa

*Control (incubation with Ellman's reagent):* to the above reaction mixture, Ellman's reagent (3 μL of a 20 mg/mL stock solution in H<sub>2</sub>O, 50.45 nmol) was added at room temperature and the resulting mixture vortexed for 30 seconds. After 4 h of additional shaking at room temperature, a 3 μL aliquot was analyzed by LC-MS (3 μL aliquot diluted by 7 μL of 50 mM sodium phosphate buffer at pH 9) and complete conversion

to the expected Ellman's product (calculated mass, 36003; observed mass, 36003) was observed.

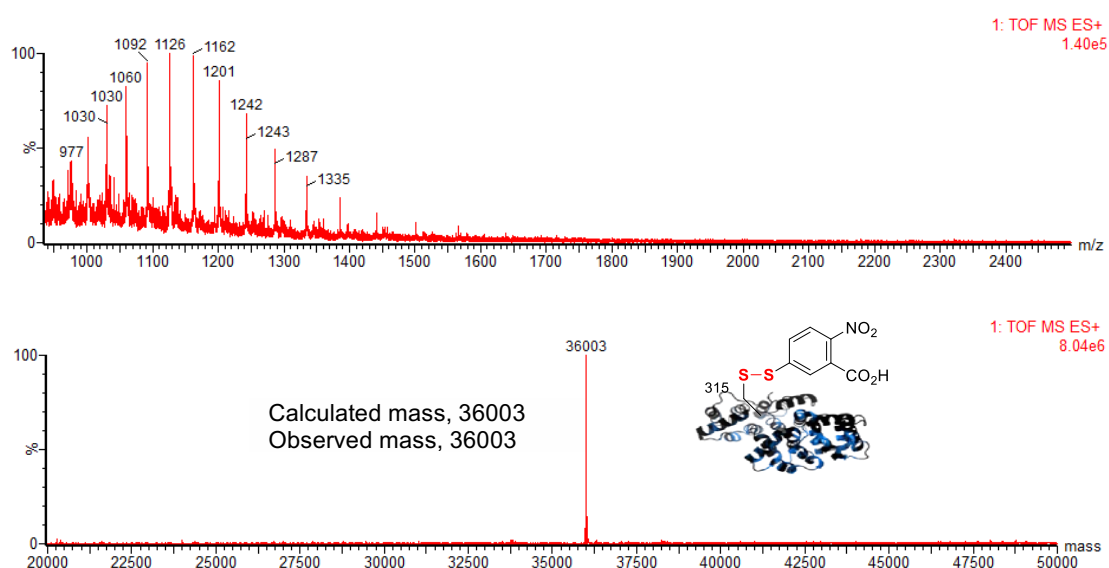

**Figure S60.** ESI-MS of the reaction of AnxV with Ellman's reagent

### Reaction of AnxV-SCH<sub>2</sub>-Ox (11) with TCEP·HCl

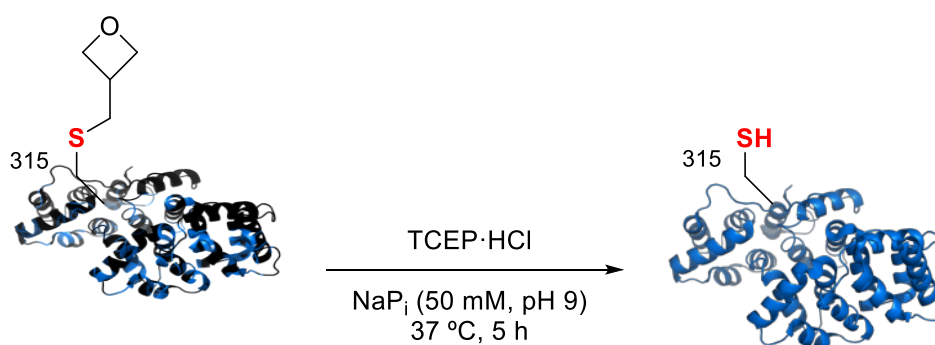

AnxV-SCH<sub>2</sub>-Ox (**11**) was prepared as a 0.25 mg/mL solution in 50 mM sodium phosphate buffer at pH 9 and 10  $\mu$ L (0.070 nmol) were transferred to a 0.5 mL eppendorf tube. TCEP·HCl (2  $\mu$ L of an 11 mg/mL stock solution in H<sub>2</sub>O, 678.0 nmol) was added at room temperature and the resulting mixture vortexed for 30 seconds. After 5 h of additional shaking at 37 °C, a 3  $\mu$ L aliquot was analyzed by LC-MS (3  $\mu$ L aliquot diluted by 7  $\mu$ L of 50 mM sodium phosphate buffer at pH 9) and complete conversion to AnxV (calculated mass, 35806; observed mass, 35806) was observed.

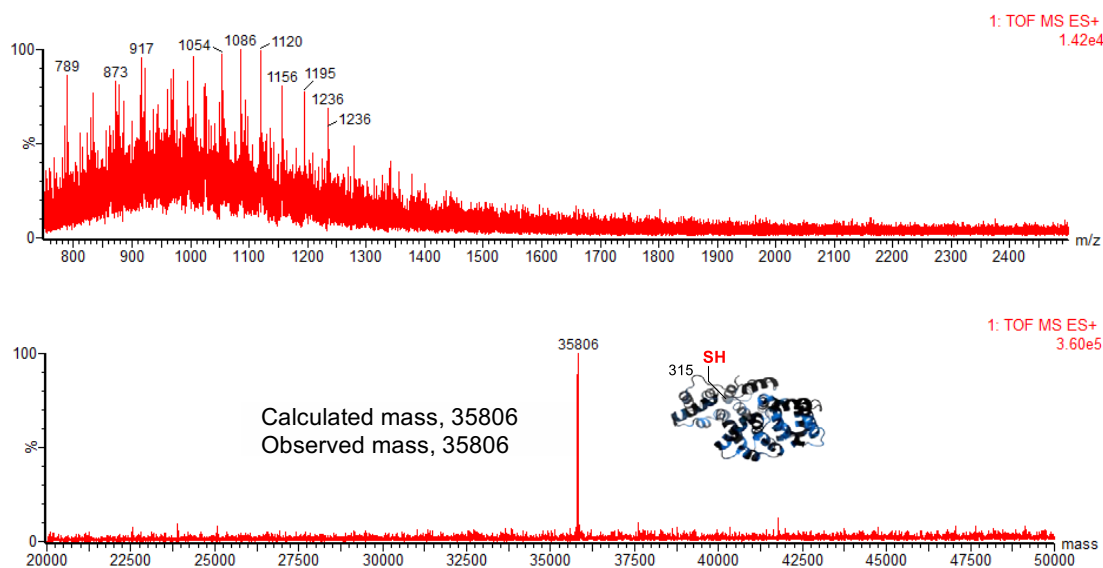

**Figure S61.** ESI-MS of the reaction of AnxV-SCH<sub>2</sub>-Ox (**11**) with TCEP·HCl

**Control: reaction of AnxV-Sac (**S3**) with BnNH<sub>2</sub>**

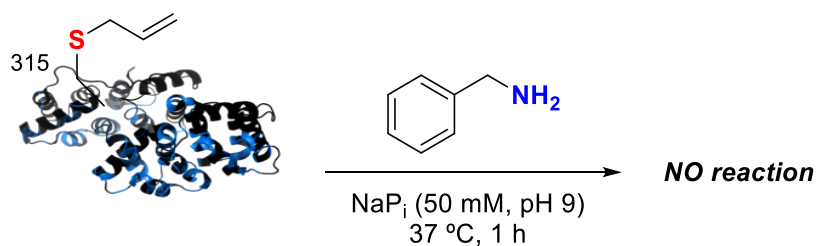

AnxV-Sac (**S3**)<sup>[11]</sup> was prepared as a 0.25 mg/mL solution in 50 mM sodium phosphate buffer at pH 9 and 20  $\mu$ L (0.139 nmol) were transferred to a 0.5 mL eppendorf tube. BnNH<sub>2</sub> (2  $\mu$ L of a 1 mg/mL stock solution in H<sub>2</sub>O, 13.9 nmol) was added at room temperature and the resulting mixture vortexed for 30 seconds. After 1 h of additional shaking at 37  $^{\circ}$ C, a 3  $\mu$ L aliquot was analyzed by LC-MS (3  $\mu$ L aliquot diluted by 7  $\mu$ L of 50 mM sodium phosphate buffer at pH 9) and starting protein (**S3**) (calculated mass, 35846; observed mass, 35846) was detected unaltered.

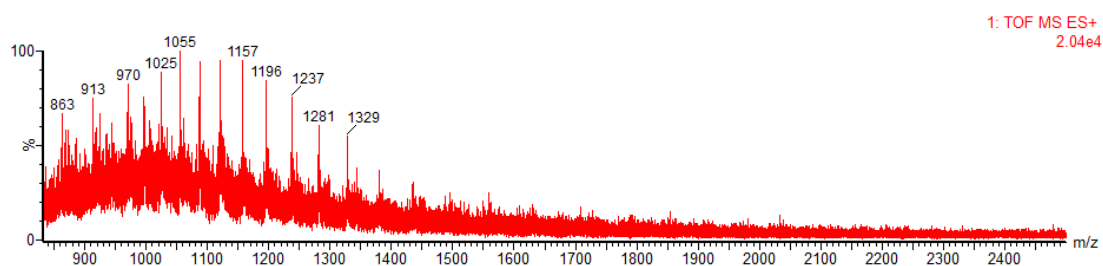



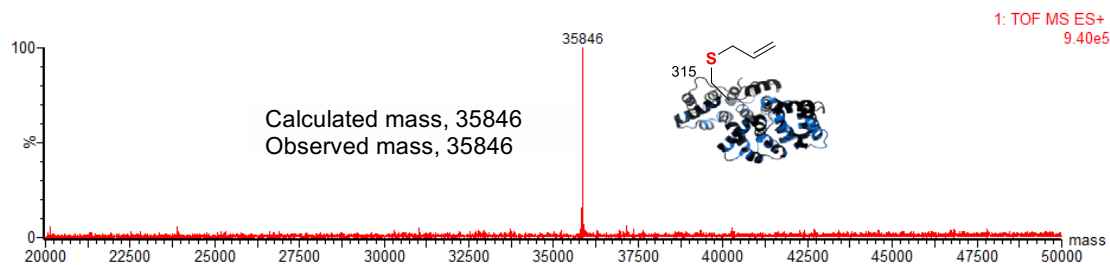

**Figure S62.** ESI-MS of the reaction of AnxV-Sac (**S3**) with BnNH<sub>2</sub>

**Control: reaction of AnxV-Sac (**S3**) with βGalSNa**

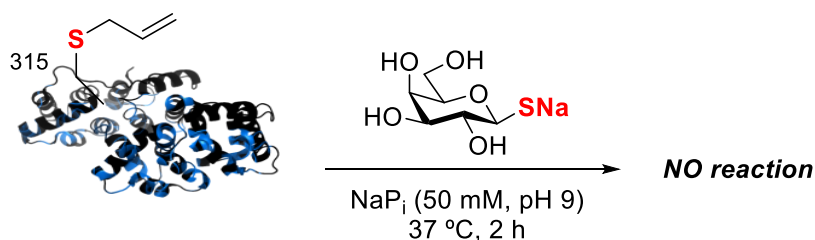

AnxV-Sac (**S3**)<sup>[11]</sup> was prepared as a 0.25 mg/mL solution in 50 mM sodium phosphate buffer at pH 9 and 20 μL (0.139 nmol) were transferred to a 0.5 mL eppendorf tube. βGalSNa (2 μL of a 0.5 mg stock solution in 330 μL H<sub>2</sub>O, 13.9 nmol) was added at room temperature and the resulting mixture vortexed for 30 seconds. After 2 h of additional shaking at 37 °C, a 3 μL aliquot was analyzed by LC-MS (3 μL aliquot diluted by 7 μL of 50 mM sodium phosphate buffer at pH 9) and starting protein (**S3**) (calculated mass, 35846; observed mass, 35846) was detected unaltered.

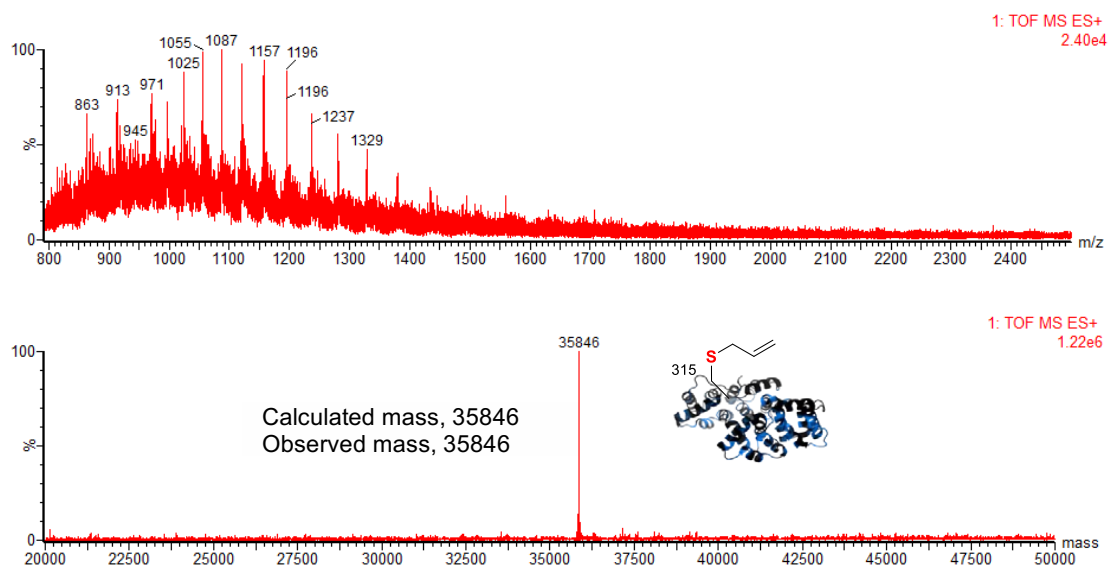

**Figure S63.** ESI-MS of the reaction of AnxV-Sac (**S3**) with βGalSNa

## Recombinant human serum albumin (rHSA)

### Sequence of rHSA C34 (modified residue highlighted)

DAHKSEVAHRFKDLGEENFKALVLIAFAQYLQQ<sup>C</sup>PFEDHVKLVNEVTEFAKT  
CVADESAENCDKSLHTLFGDKLCTVATLRETYGEMADCCAKQEPERNECFL  
QHKDDNPNLPRLVPRPEVDVMCTAFHDNEETFLKKYLYEIARRHPYFYAPELL  
FFAKRYKAAFTECCQAADKAACLLPKLDLDELDEGKASSAKQRLKCASLQKF  
GERAFKAWAVARLSQRFPKAEFAEVSKLVTDLTKVHTECCHGDLLECADDR  
ADLAKYICENQDSISSKLKECCEKPLLEKSHCIAEVENDEMPADLPSLAADFV  
ESKDVCKNYAEAKDVFLGMFLYEYARRHPDYSVLLLLRLAKTYETTLEKCCA  
AADPHECYAKVFDEFKPLVEEPQNLKQNCLEFEQLGEYKFQNALLVRYTKK  
VPQVSTPTLVEVSRNLGKVGSKCCKHPEAKRMPCAEDYLSVVLNQLCVLHE  
KTPVSDRVTKCCTESLVNRRPCFSALEVDETYVPKEFNAETFTFHADICTLS  
EKERQIKKQTALVELVKHKPKATKEQLKAVMDDFAAFVEKCKADDKETCF  
AEEGKKLVAASQAALGL

Calculated average isotopic mass = 66438.21 Da (17 internal disulfides)

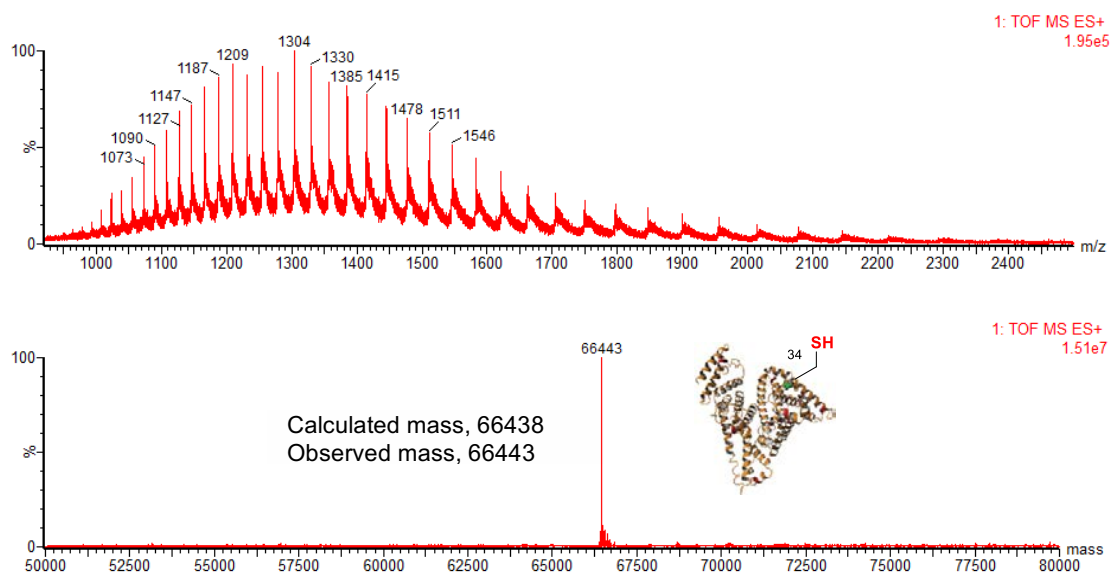

**Figure S64.** ESI-MS spectrum of rHSA

### Control: reaction of rHSA with Ellman's reagent

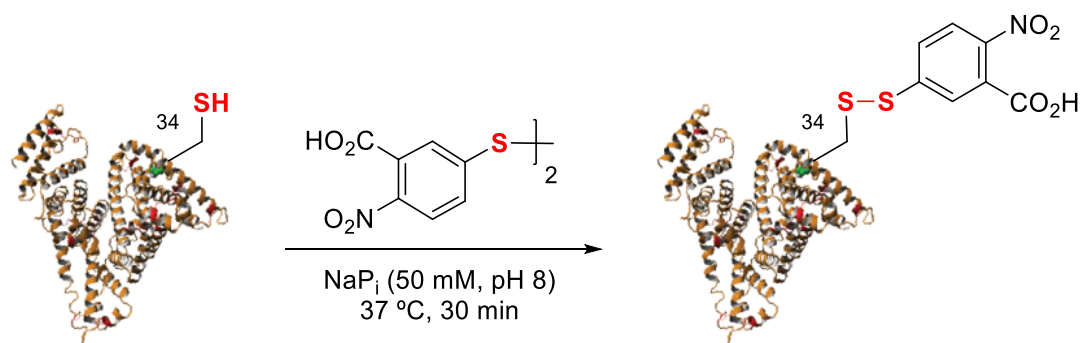

A 10  $\mu$ L aliquot of rHSA (1 mg/mL, 0.151 nmol) in 50 mM sodium phosphate buffer at pH 8 was transferred to a 0.5 mL eppendorf tube. Ellman's reagent (3  $\mu$ L of a 14 mg/mL stock solution in H<sub>2</sub>O, 105.98 nmol) was added at room temperature and the resulting mixture vortexed for 30 seconds. After 30 min of additional shaking at 37 °C, a 3  $\mu$ L aliquot was analyzed by LC-MS (3  $\mu$ L aliquot diluted by 7  $\mu$ L of 50 mM sodium phosphate buffer at pH 8) and complete conversion to the expected Ellman's product (calculated mass, 66636; observed mass, 66639) was observed.

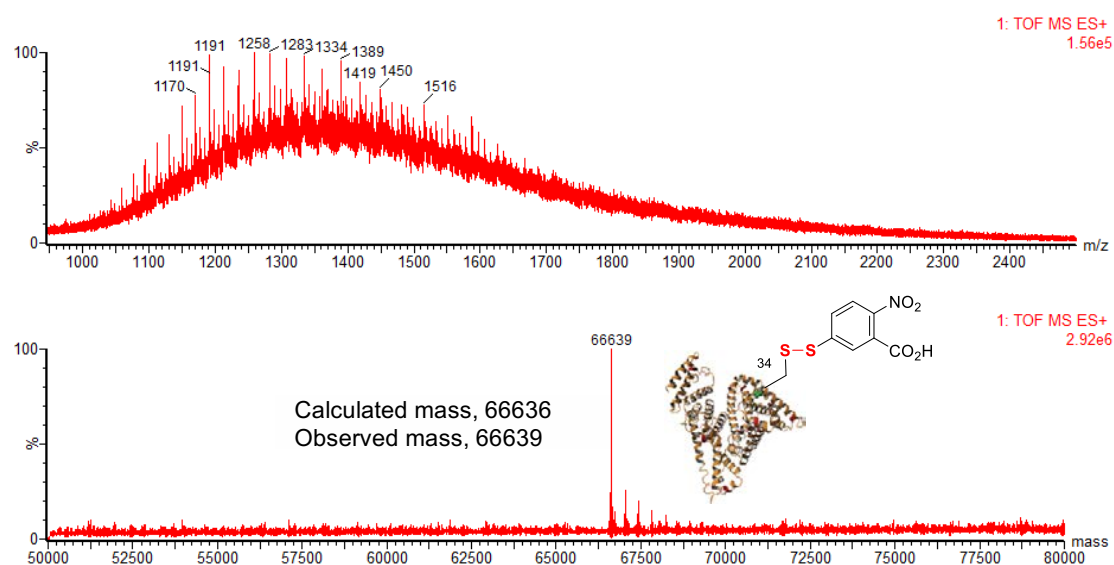

**Figure S65.** ESI-MS of the reaction of rHSA with Ellman's reagent

## Reaction of rHSA with 3-(bromomethyl)oxetane (9)

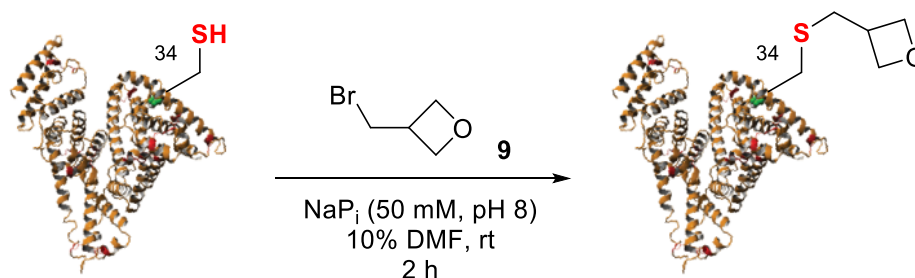

All manipulations were carried out at room temperature. A 100  $\mu$ L aliquot of rHSA (1 mg/mL, 1.51 nmol) in 50 mM sodium phosphate buffer at pH 8 was transferred to a 0.5 mL eppendorf tube. 3-(Bromomethyl)oxetane (9) (11  $\mu$ L of a 0.12 mg stock solution in 110  $\mu$ L DMF, 376.3 nmol) was added and the resulting mixture vortexed for 30 seconds. After 2 h of additional shaking, a 3  $\mu$ L aliquot was analyzed by LC-MS (3  $\mu$ L aliquot diluted by 7  $\mu$ L of 50 mM sodium phosphate buffer at pH 8) and 25% conversion to rHSA-SCH<sub>2</sub>-Ox (12) (calculated mass, 66508; observed mass, 66513) was observed.

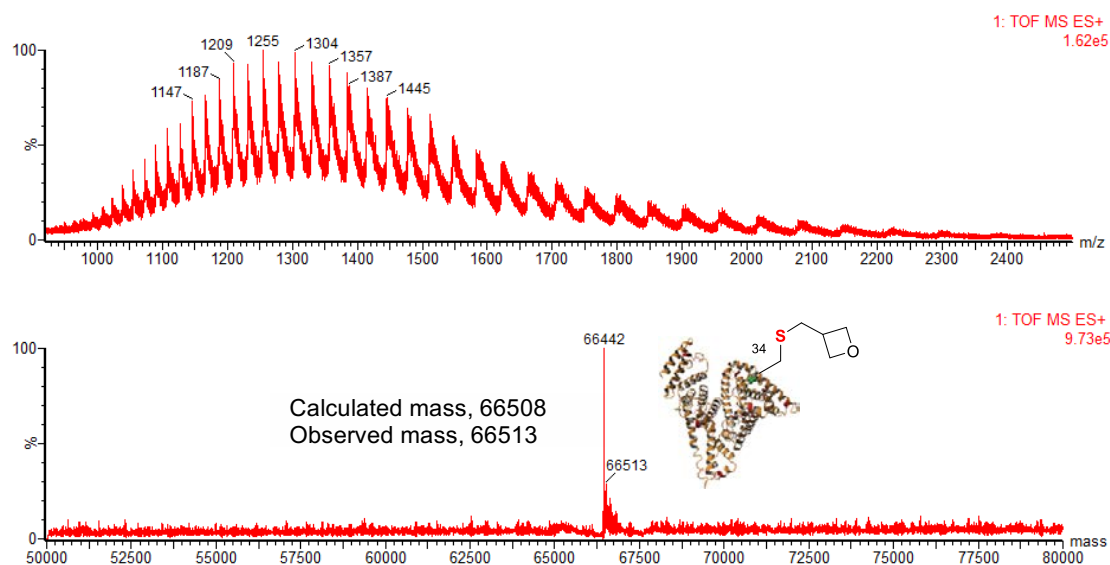

**Figure S66.** ESI-MS of the reaction of rHSA with 3-(bromomethyl)oxetane (9)

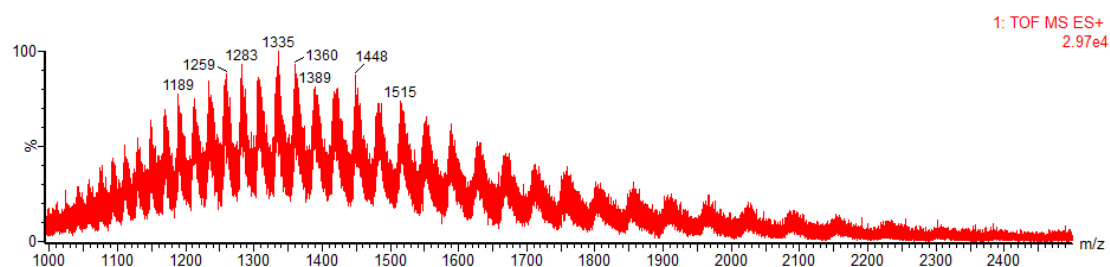

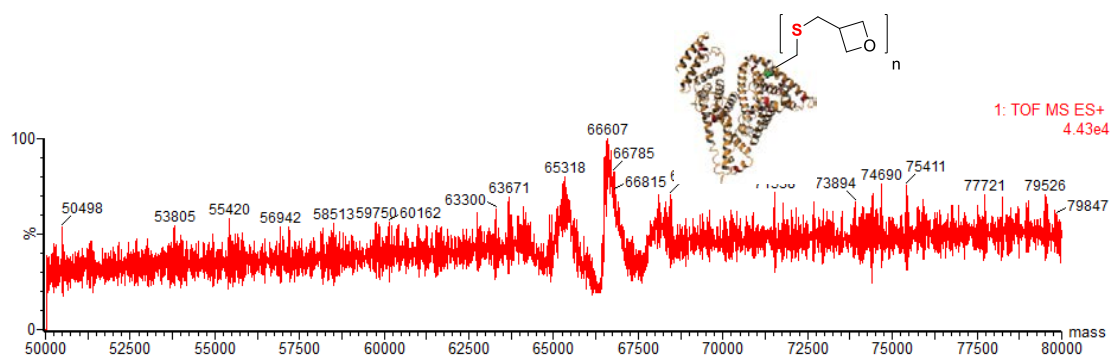

**Figure S67.** ESI-MS of the reaction of rHSA with 3-(bromomethyl)oxetane (**9**) (>50 equiv. and 14 h at 37 °C)

### Trastuzumab (Thiomab™ 4D5 LC-V205C)

Trastuzumab was reduced, purified, and re-oxidized as described.<sup>[14]</sup>

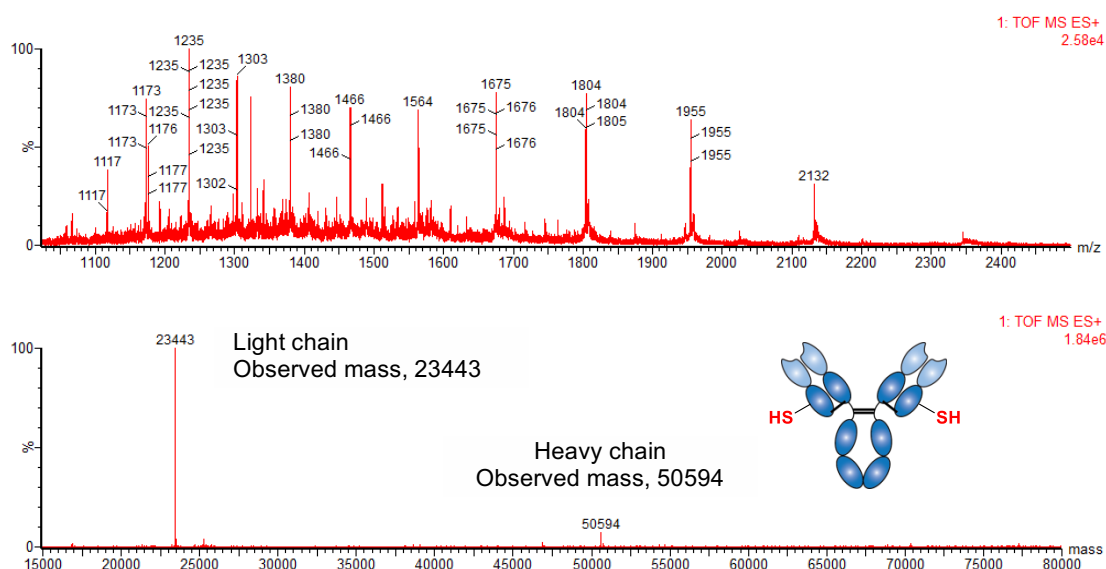

**Figure S68.** ESI-MS spectrum of reduced Trastuzumab (treated with TCEP·HCl for analysis)

### Reaction of Trastuzumab with 3-(bromomethyl)oxetane (**9**)

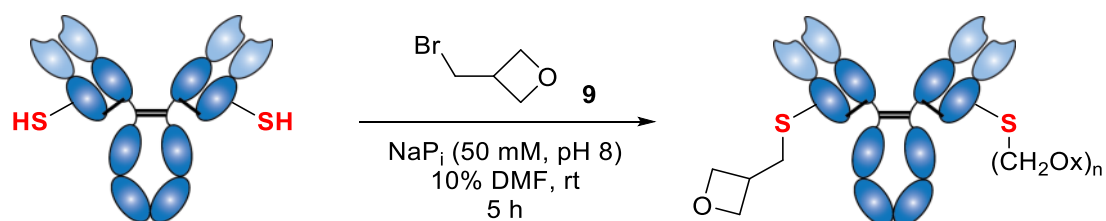

All manipulations were carried out at room temperature. A 50  $\mu$ L aliquot of Trastuzumab (1 mg/mL, 0.355 nmol) in 50 mM sodium phosphate buffer at pH 8 was transferred to a 0.5 mL eppendorf tube. 3-(Bromomethyl)oxetane (**9**) (5.5  $\mu$ L of a 1.3

mg stock solution in 2.5 mL DMF, 17.8 nmol) was added and the resulting mixture vortexed for 30 seconds. After 5 h of additional shaking, a 3  $\mu$ L aliquot was analyzed by LC-MS (3  $\mu$ L aliquot diluted by 6  $\mu$ L of 50 mM sodium phosphate buffer at pH 8 and 1  $\mu$ L of TCEP·HCl, 1 mg/mL stock solution in H<sub>2</sub>O) and ~50% conversion to Trastuzumab-(SCH<sub>2</sub>-Ox)<sub>n</sub> (**13**) (Light chain; observed masses, 23563 and 23750) was observed. Small molecules were removed from the reaction mixture by loading the sample onto a Zeba™ Spin desalting column (ThermoFisher Scientific) previously equilibrated with PBS buffer at pH 7.6. The sample was eluted by centrifugation (2 min, 1500xg) and concentrated on a Vivaspin™ membrane concentrator (30 kDa molecular weight cut off). The protein sample (2.81 mg/mL by Bradford assay) was flash frozen with liquid nitrogen and stored at -20 °C.

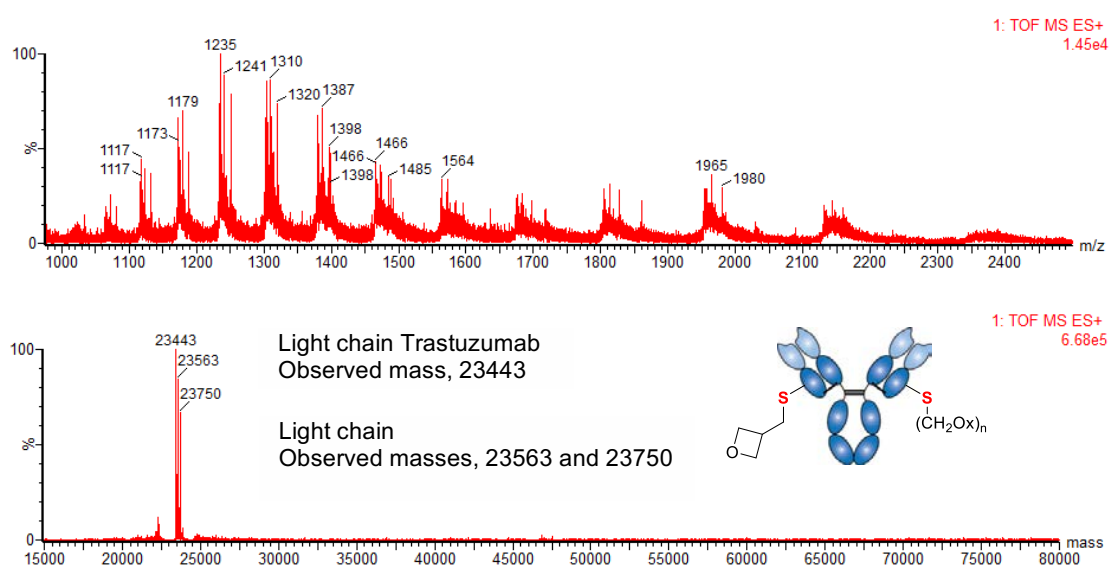

**Figure S69.** ESI-MS of the reaction of Trastuzumab with 3-(bromomethyl)oxetane (**9**) (treated with TCEP·HCl for analysis)

#### Reaction of Trastuzumab-(SCH<sub>2</sub>-Ox)<sub>n</sub> (**13**) with TCEP·HCl

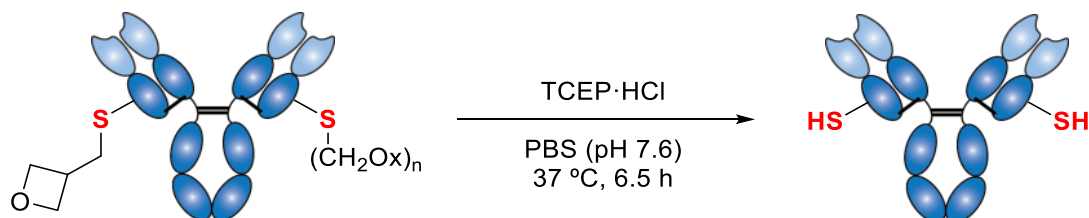

Trastuzumab-(SCH<sub>2</sub>-Ox)<sub>n</sub> (**13**) was prepared as a *ca.* 1 mg/mL solution in PBS buffer at pH 7.6 and 13  $\mu$ L (*ca.* 0.924 nmol) were transferred to a 0.5 mL eppendorf tube. TCEP·HCl (2  $\mu$ L of a 13.2 mg/mL stock solution in H<sub>2</sub>O, 92.4 nmol) was added and

the resulting mixture vortexed for 30 seconds. After 6.5 h of additional shaking at 37 °C, a 3  $\mu$ L aliquot was analyzed by LC–MS (3  $\mu$ L aliquot diluted by 7  $\mu$ L of PBS buffer at pH 7.6) and complete conversion to Trastuzumab (Light chain; observed mass, 23447. Heavy chain; observed mass, 50601) was observed. Small molecules were removed from the reaction mixture by loading the sample onto a Zeba™ Spin desalting column (ThermoFisher Scientific) previously equilibrated with PBS buffer at pH 7.6. The sample was eluted by centrifugation (2 min, 1500xg) and concentrated on a Vivaspin™ membrane concentrator (30 kDa molecular weight cut off). The protein sample (2.85 mg/mL by Bradford assay) was flash frozen with liquid nitrogen and stored at –20 °C.

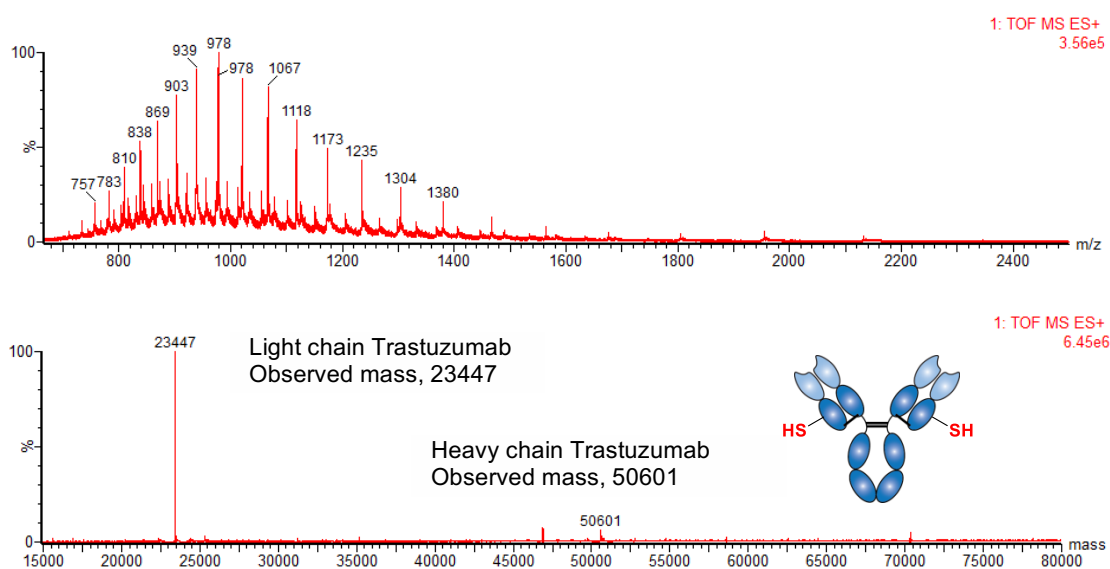

**Figure S70.** ESI–MS of the reaction of Trastuzumab-(SCH<sub>2</sub>-Ox)<sub>n</sub> (**13**) with TCEP·HCl

### Reaction of Trastuzumab-(SCH<sub>2</sub>-Ox)<sub>n</sub> (**13**) with BnNH<sub>2</sub>

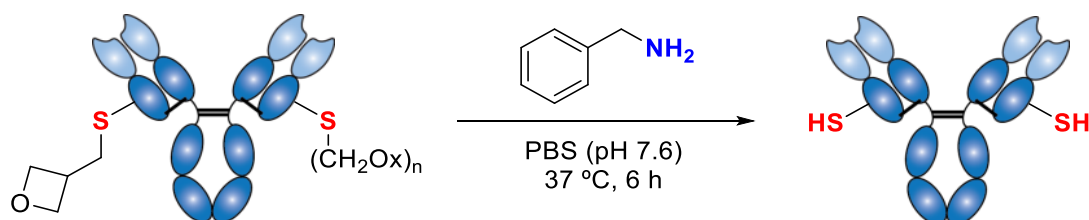

Trastuzumab-(SCH<sub>2</sub>-Ox)<sub>n</sub> (**13**) was prepared as a *ca.* 1 mg/mL solution in PBS buffer at pH 7.6 and 13  $\mu$ L (*ca.* 0.924 nmol) were transferred to a 0.5 mL eppendorf tube. BnNH<sub>2</sub> (2  $\mu$ L of a 0.5  $\mu$ L stock solution in 100  $\mu$ L H<sub>2</sub>O, 92.4 nmol) was added and the resulting mixture vortexed for 30 seconds. After 6 h of additional shaking at 37

°C, a 3  $\mu\text{L}$  aliquot was analyzed by LC-MS (3  $\mu\text{L}$  aliquot diluted by 6  $\mu\text{L}$  of PBS buffer at pH 7.6 and 1  $\mu\text{L}$  of TCEP·HCl, 1 mg/mL stock solution in  $\text{H}_2\text{O}$ ) and complete conversion to Trastuzumab (Light chain; observed mass, 23442) was observed.

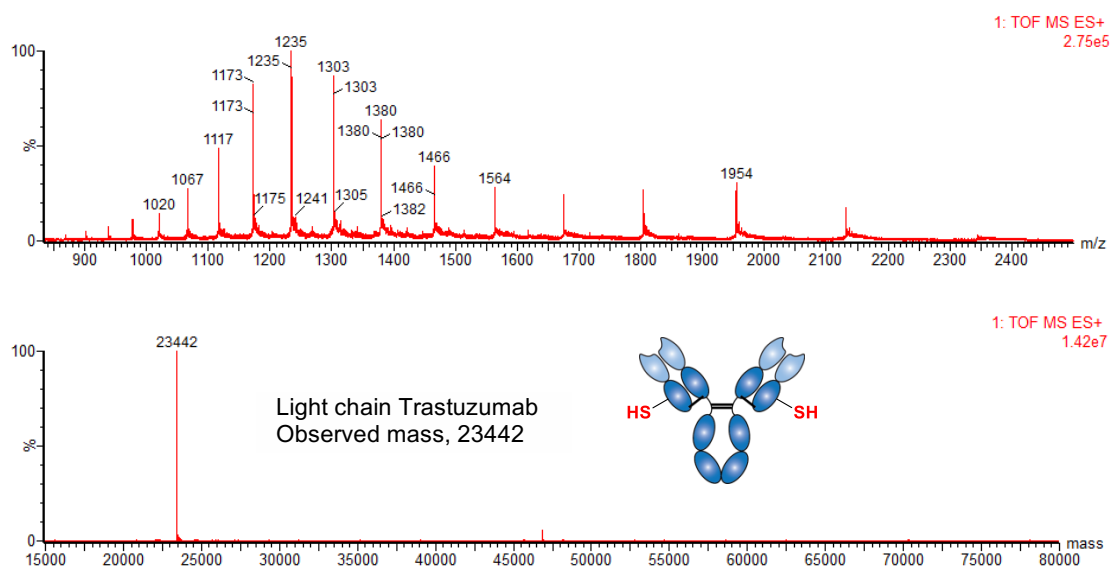

**Figure S71.** ESI-MS of the reaction of Trastuzumab-( $\text{SCH}_2\text{-Ox}$ )<sub>n</sub> (**13**) with  $\text{BnNH}_2$  (treated with TCEP·HCl for analysis)

### Reaction of Trastuzumab-( $\text{SCH}_2\text{-Ox}$ )<sub>n</sub> (**13**) with BME

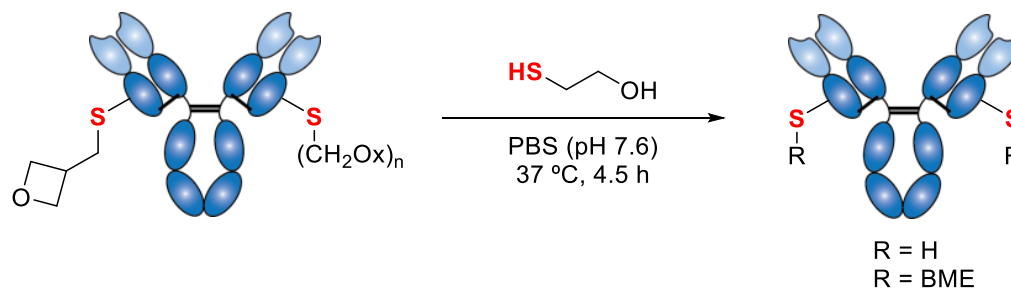

Trastuzumab-( $\text{SCH}_2\text{-Ox}$ )<sub>n</sub> (**13**) was prepared as a *ca.* 1 mg/mL solution in PBS buffer at pH 7.6 and 13  $\mu\text{L}$  (*ca.* 0.924 nmol) were transferred to a 0.5 mL eppendorf tube. BME (2  $\mu\text{L}$  of a 0.5  $\mu\text{L}$  stock solution in 154  $\mu\text{L}$   $\text{H}_2\text{O}$ , 92.4 nmol) was added and the resulting mixture vortexed for 30 seconds. After 4.5 h of additional shaking at 37 °C, a 3  $\mu\text{L}$  aliquot was analyzed by LC-MS (3  $\mu\text{L}$  aliquot diluted by 7  $\mu\text{L}$  of PBS buffer at pH 7.6) and 40% conversion to Trastuzumab (Light chain; observed mass, 23443) together with 60% conversion to the corresponding mixed BME disulfide (Light chain; observed mass, 23519) was observed. When the same aliquot was treated with



1  $\mu\text{L}$  of TCEP-HCl (1 mg/mL stock solution in  $\text{H}_2\text{O}$ ) for analysis, complete conversion to Trastuzumab (Light chain; observed mass, 23443) was observed.

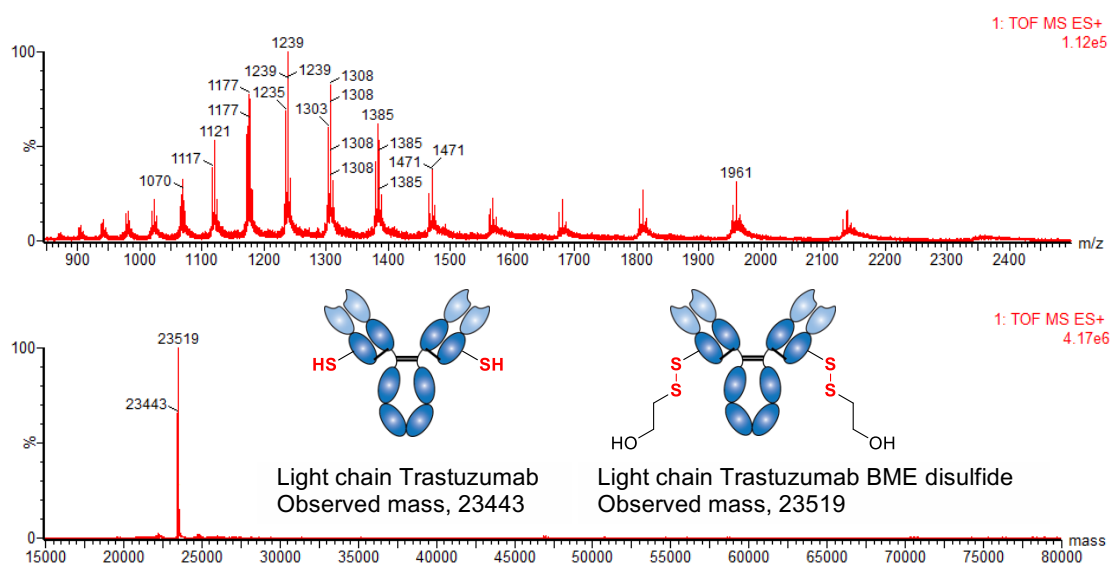

**Figure S72.** ESI-MS of the reaction of Trastuzumab- $(\text{SCH}_2\text{-Ox})_n$  (**13**) with BME

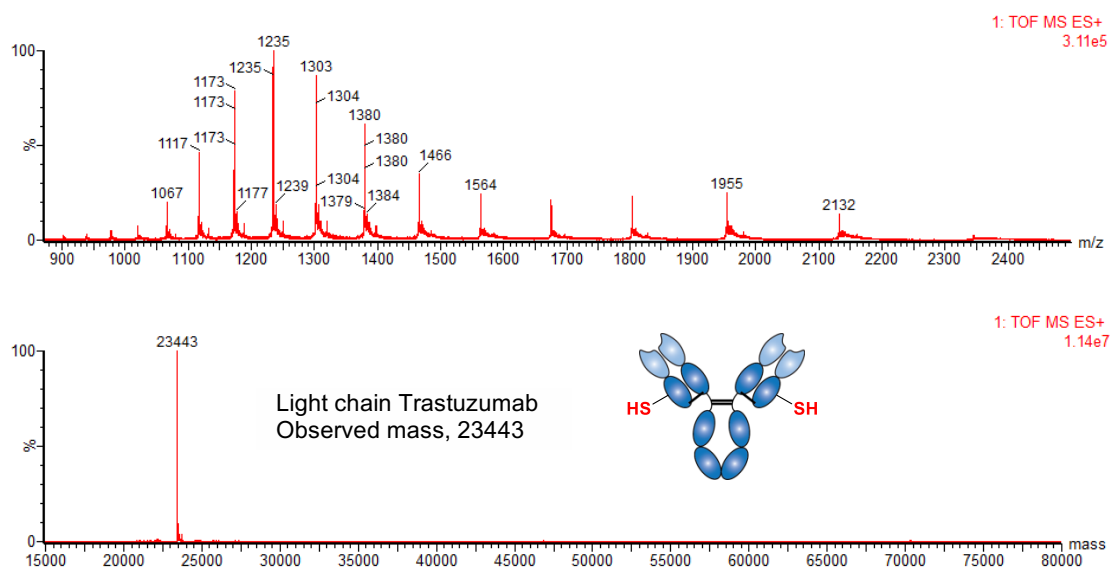

**Figure S73.** ESI-MS of the reaction of Trastuzumab- $(\text{SCH}_2\text{-Ox})_n$  (**13**) with BME (treated with TCEP-HCl for analysis)

## 2.2. LC-MS/MS Analysis

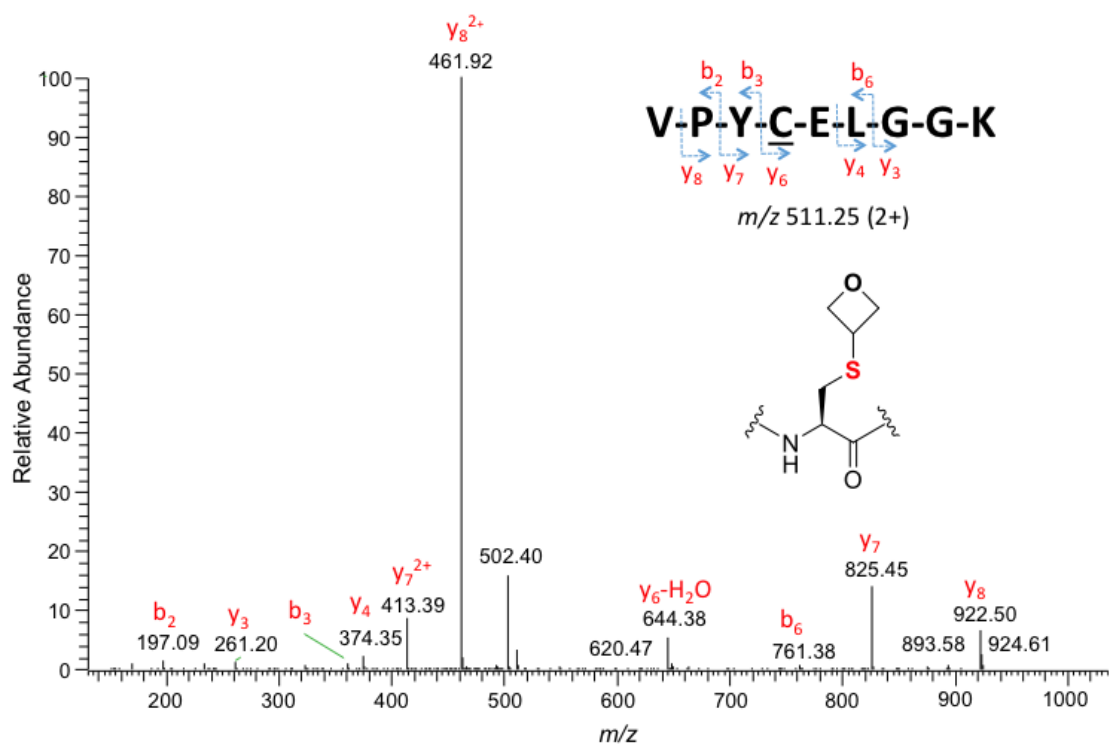

**Figure S74.** MS/MS spectrum of the  $m/z$  511.25 (2+) ion of the tryptic peptide VPYCELGGK from C2Am 3-S-Ox (**2**), containing the 3-S-Oxetane modification at the original cysteine residue. The generated fragment ions are consistent with the mass of the modification

### 2.3. SDS Polyacrylamide Gel Electrophoresis (SDS-PAGE)

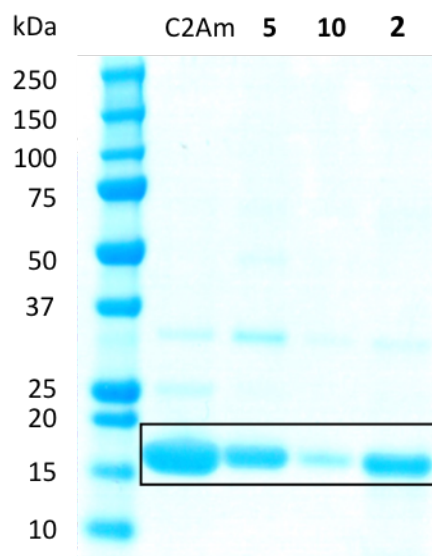

**Figure S75.** SDS-PAGE (MES SDS running buffer) analysis of C2Am and modified proteins C2Am 3-*S*-Ox (**2**), C2Am BrCH<sub>2</sub>-*S*-Ox (**5**), and C2Am SCH<sub>2</sub>-Ox (**10**)

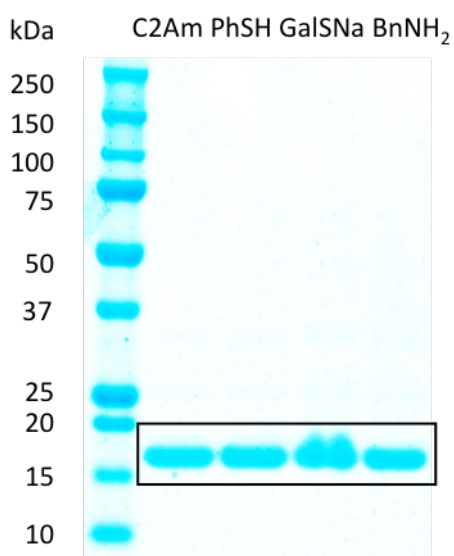

**Figure S76.** SDS-PAGE (MES SDS running buffer) analysis of starting and recovered C2Am after reaction of C2Am SCH<sub>2</sub>-Ox (**10**) with PhSH, GalSNa, and BnNH<sub>2</sub>

## 2.4. $^1\text{H-NMR}$ Experiments

### Evaluation of lysine (Lys) cross-reactivity with 3-bromooxetane (**1**)

To a solution of Lys-peptide (**S1**) (1 mg, 2.4  $\mu\text{M}$ ) in deuterated  $\text{NaP}_i$  buffer (50 mM, pH 11, 600  $\mu\text{L}$ ) contained in an NMR tube, 3-bromooxetane (**1**) (1.5 equiv.) in 10%  $\text{DMF-}d_7$  was added. After 36 h at 37  $^\circ\text{C}$ , starting Lys-peptide (**S1**) and 3-bromooxetane (**1**) were detected unaltered.

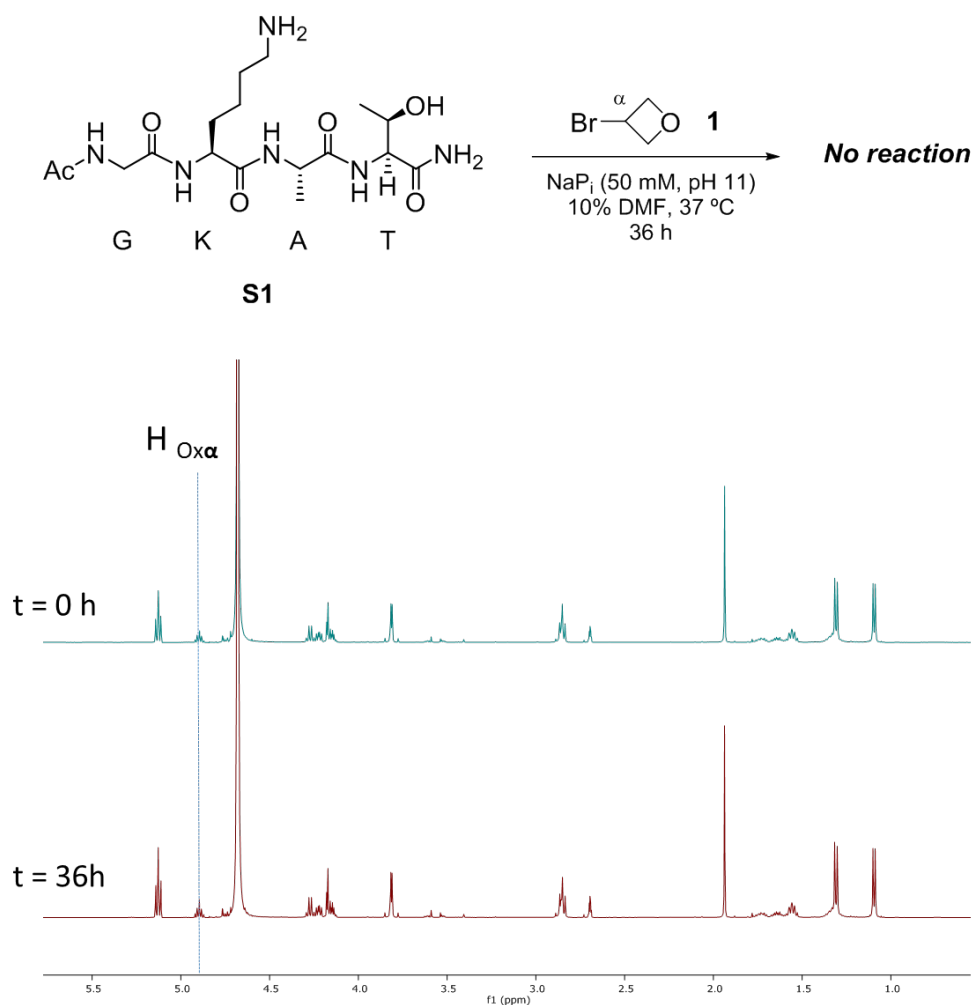

**Figure S77.**  $^1\text{H-NMR}$  spectra superposition of the reaction of Lys-peptide (**S1**) with 3-bromooxetane (**1**).

### Evaluation of Lys cross-reactivity with 3,3-bis(bromomethyl)oxetane (**4**)

To a solution of Lys-peptide (**S1**) (1 mg, 2.4  $\mu\text{M}$ ) in deuterated  $\text{NaP}_i$  buffer (50 mM, pH 11, 600  $\mu\text{L}$ ) contained in an NMR tube, 3,3-bis(bromomethyl)oxetane (**4**) (1.5 equiv.) in 10%  $\text{DMF-}d_7$  was added. After 36 h at 37  $^\circ\text{C}$ , starting Lys-peptide (**S1**) and 3,3-bis(bromomethyl)oxetane (**4**) were detected unaltered.

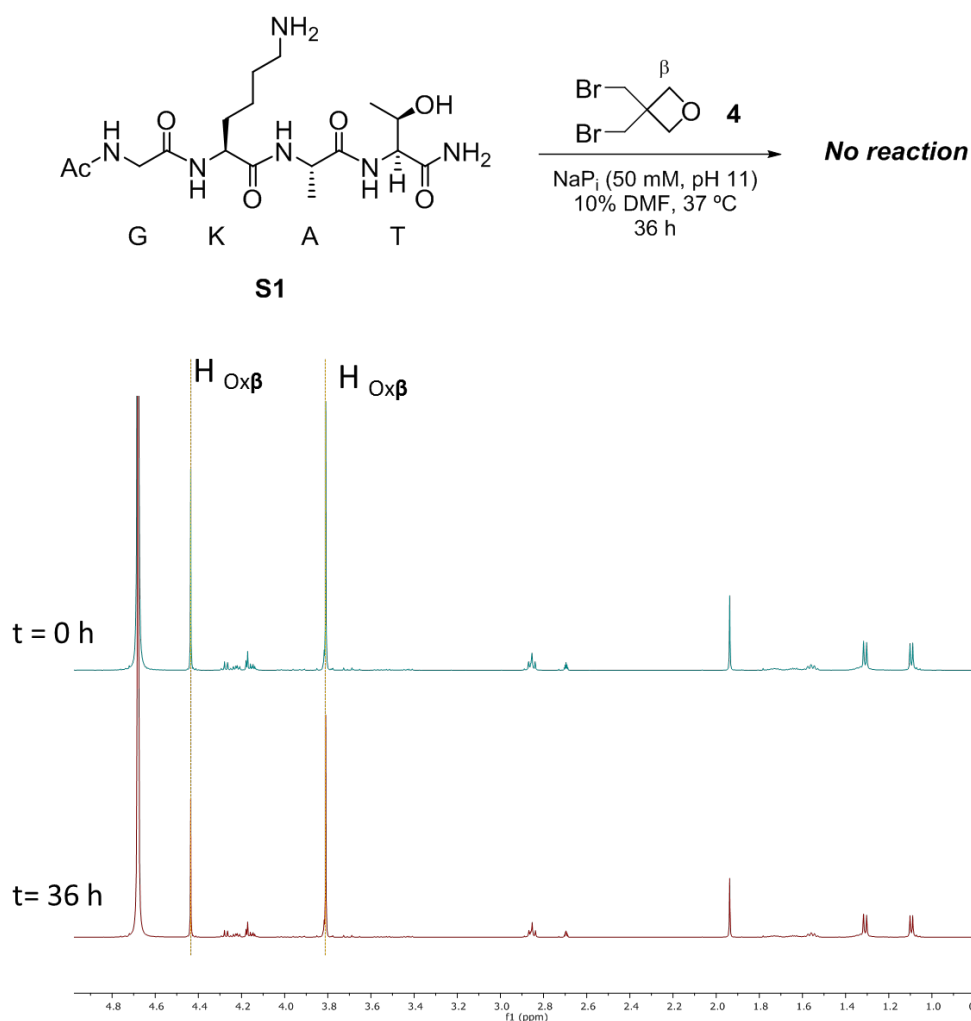

**Figure S78.**  $^1\text{H}$ -NMR spectra superposition of the reaction of Lys-peptide (**S1**) with 3,3-bis(bromomethyl)oxetane (**4**).

### Lysine (Lys) vs. cysteine (Cys) reactivity with 3-(bromomethyl)oxetane (**9**)

To a solution of Lys-peptide (**S1**) (1 mg, 2.4  $\mu\text{M}$ ) in deuterated  $\text{NaP}_i$  buffer (50 mM, pH 8, 600  $\mu\text{L}$ ) contained in an NMR tube, 3-(bromomethyl)oxetane (**9**) (1.5 equiv.) in 10%  $\text{DMF-}d_7$  was added. After 36 h at 37  $^\circ\text{C}$ , starting Lys-peptide (**S1**) and 3-(bromomethyl)oxetane (**9**) were detected unaltered. Similarly, to a solution of Cys-peptide (**S4**) (1 mg, 2.5  $\mu\text{M}$ ) in deuterated  $\text{NaP}_i$  buffer (50 mM, pH 8, 600  $\mu\text{L}$ ) contained in an NMR tube, 3-(bromomethyl)oxetane (**9**) (1.5 equiv.) in 10%  $\text{DMF-}d_7$  was added. After 36 h at 37  $^\circ\text{C}$ , changes in the chemical shift of the  $\text{H}_\alpha$  of 3-(bromomethyl)oxetane (**9**) demonstrated the alkylation of Cys-peptide (**S4**) to peptide- $\text{SCH}_2\text{-Ox}$  (**S5**) in >90% conversion.

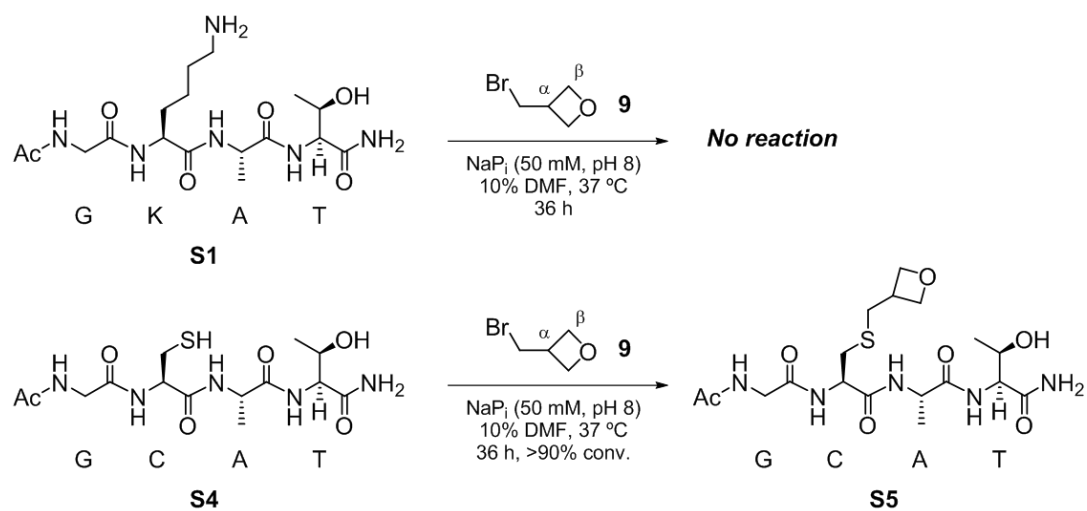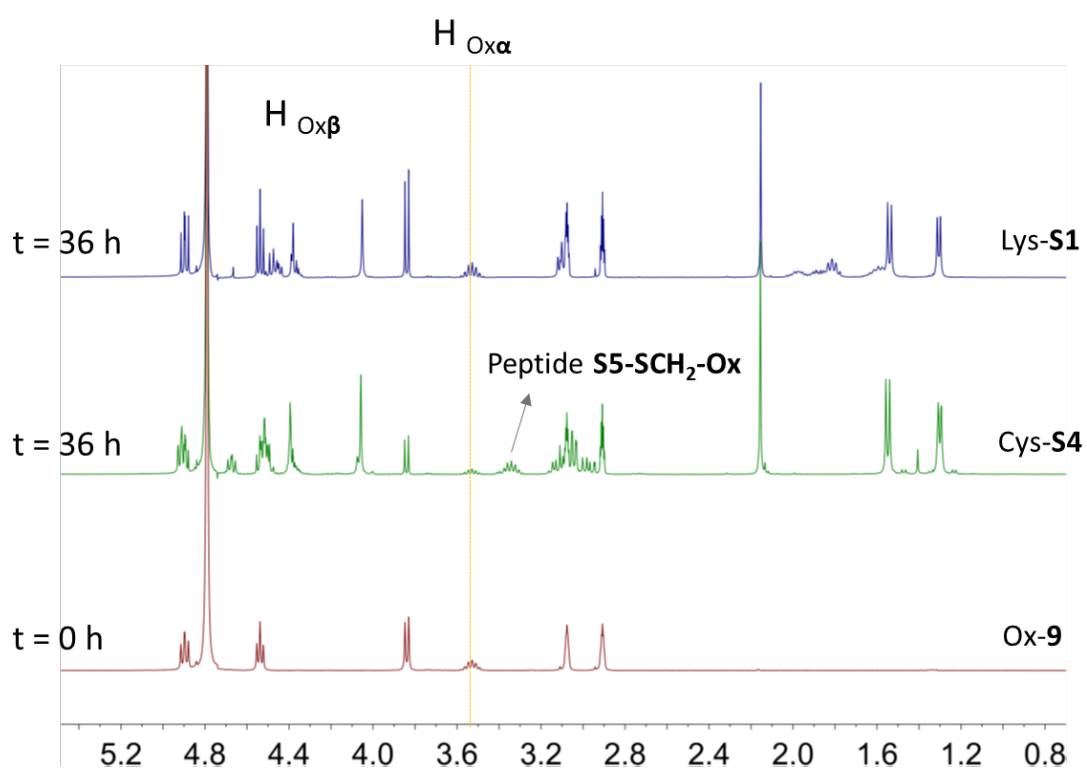

**Figure S79.**  $^1\text{H-NMR}$  spectra superposition of the reaction of Lys-peptide (**S1**) and Cys-peptide (**S4**) with 3-(bromomethyl)oxetane (**9**).

## 2.5. Circular Dichroism (CD)

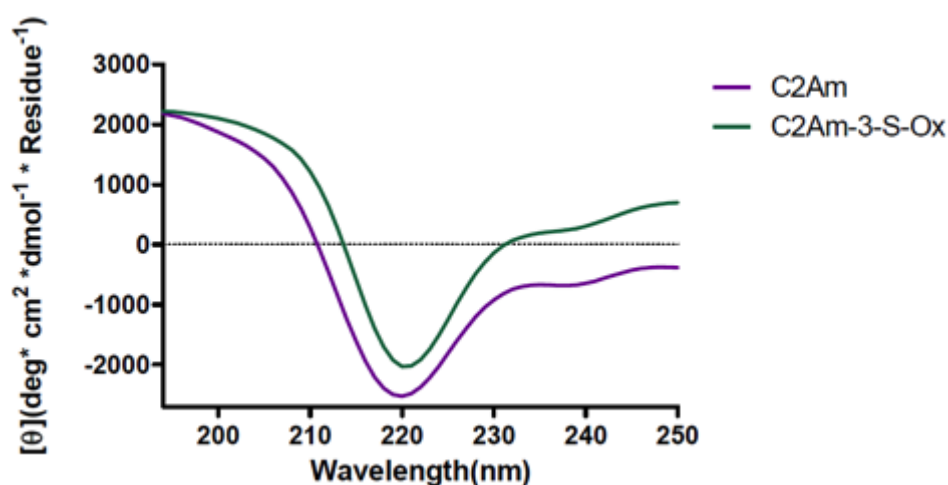

**Figure S80.** CD spectra of C2Am and C2Am 3-*S*-Ox (**2**) in sodium phosphate buffer (50 mM, pH 8). The final concentration of protein samples was 12  $\mu$ M.

## 2.6. Molecular Dynamics (MD) Simulations

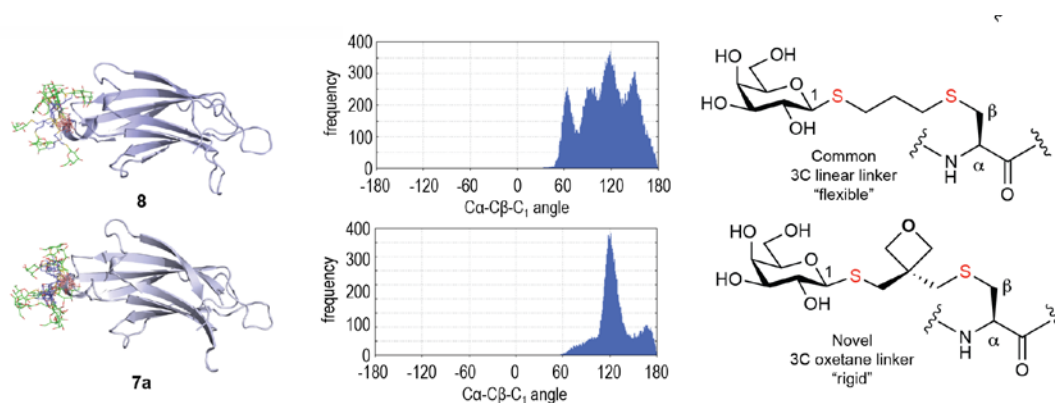

**Figure S81.** Analysis of the flexibility of *S*-to-*S/N* oxetane linker in C2Am- $\beta$ GalSCH<sub>2</sub>-*S*-Ox (**7a**) vs. a standard 3C-linear linker in C2Am- $\beta$ GalS-(CH<sub>2</sub>)<sub>3</sub> (**8**) obtained from 100 ns MD simulations. The data presented in this figure corresponds to the average structure of both linkers throughout the simulations.

## 2.7. Surface Plasmon Resonance (SPR)

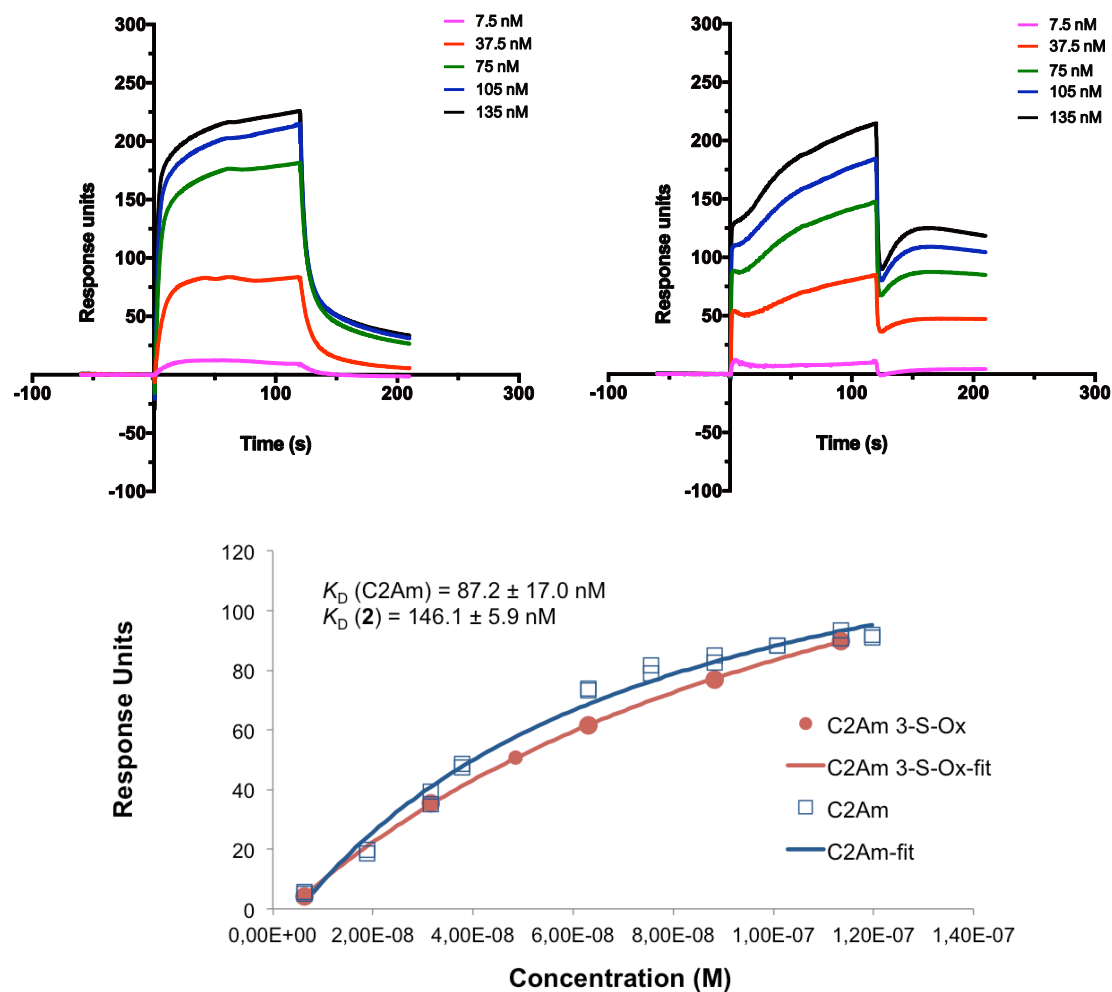

**Figure S82.** Biacore SPR curves obtained for C2Am (left) and C2Am 3-S-Ox (**2**) (right) against phosphatidylserine (PS), together with the  $K_D$  constants derived from SPR thermal equilibrium analysis.



## 2.8. Bio-Layer Interferometry (BLI)

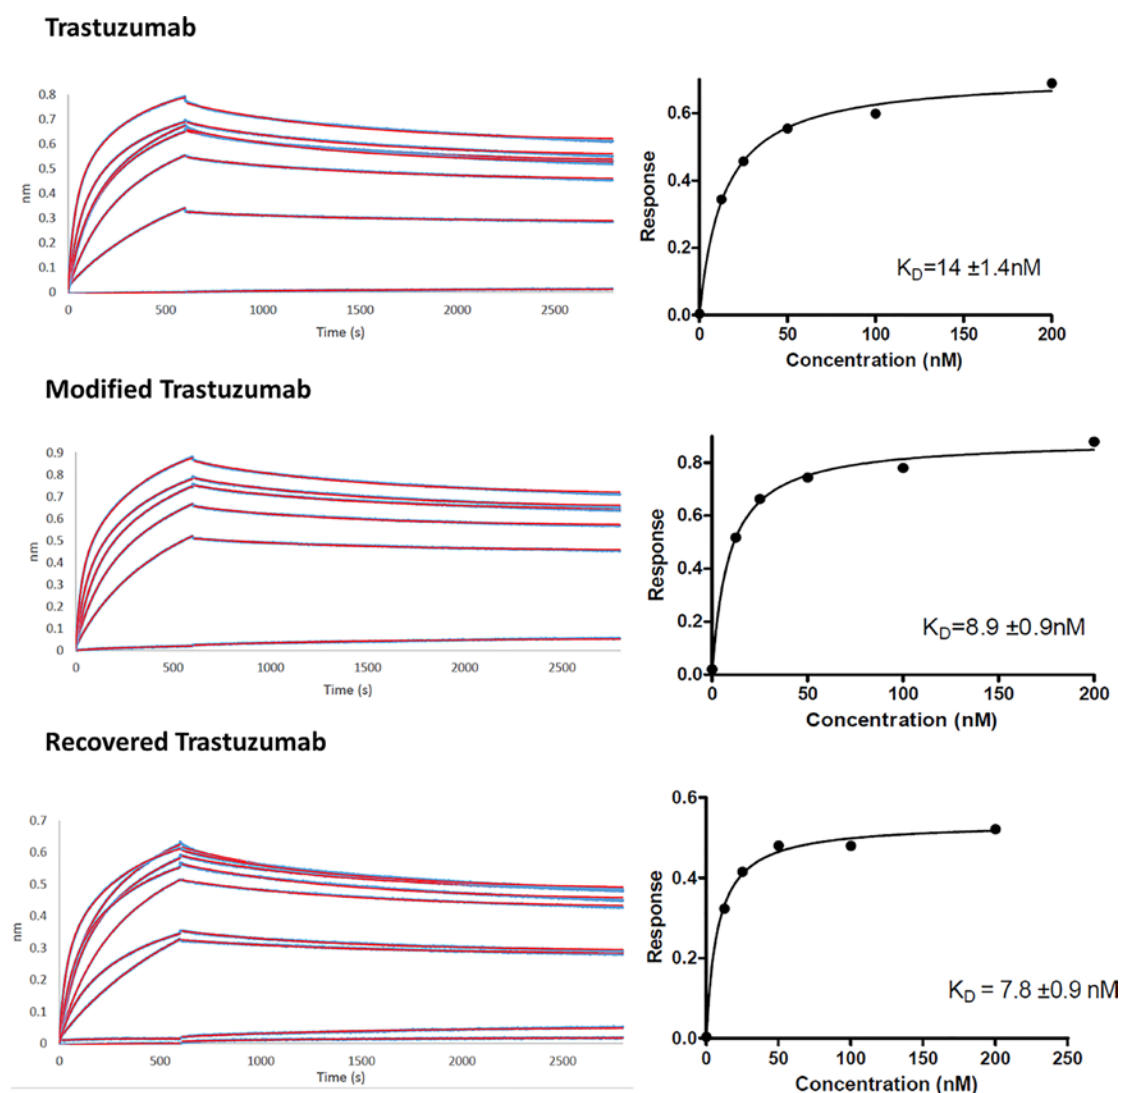

**Figure S83.** BLI curves (in blue) and fitting curves (in red) obtained for starting, modified **13**, and recovered Trastuzumab against HER2 receptor, together with the  $K_D$  constants derived from BLI experiments.

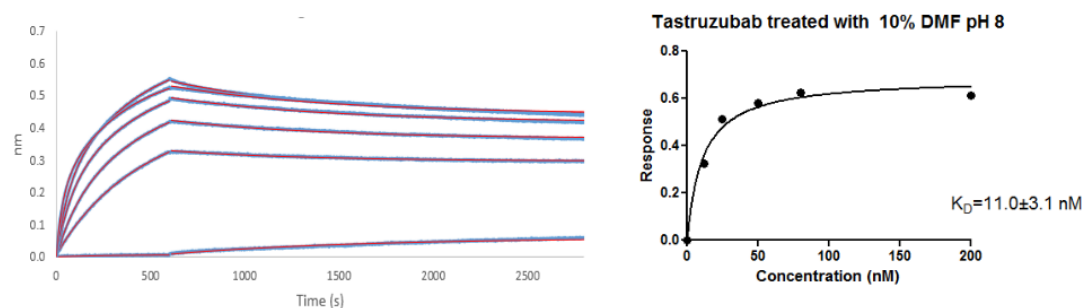

**Figure S84.** BLI curves (in blue) and fitting curves (in red) obtained for Trastuzumab treated under the same conditions (without the oxetane reagent) against HER2 receptor, together with the  $K_D$  constants derived from BLI experiments.

### 3. References

- [1] Case, D. A.; Darden, T. A.; Cheatham, T. E.; Simmerling, C. L.; Wang, J.; Duke, R. E.; Luo, R.; Walker, R. C.; Zhang, W.; Merz, K. M.; Roberts, B.; Hayik, S.; Roitberg, A.; Seabra, G.; Swails, J.; Goetz, A. W.; Kolossváry, I.; Wong, K. F.; Paesani, F.; Vanicek, J.; Wolf, R. M.; Liu, J.; Wu, X.; Brozell, S. R.; Steinbrecher, T.; Gohlke, H.; Cai, Q.; Ye, X.; Wang, J.; Hsieh, M. J.; Cui, G.; Roe, D. R.; Mathews, D. H.; Seetin, M. G.; Salomon-Ferrer, R.; Sagui, C.; Babin, V.; Luchko, T.; Gusarov, S.; Kovalenko, A.; Kollman, P. A. *AMBER* 12 (2012).
- [2] Hornak, V.; Abel, R.; Okur, A.; Strockbine, B.; Roitberg, A.; Simmerling, C. *Proteins* **2006**, *65*, 712–725.
- [3] K. N. Kirschner, A. B. Yongye, S. M. Tschampel, J. González-Outeiriño, C. R. Daniels, B. L. Foley, R. J. Woods, *J. Comput. Chem.* **2008**, *29*, 622–655.
- [4] J. Wang, R. M. Wolf, J. W. Caldwell, P. A. Kollman, D. A. J. Case *Comput. Chem.* **2004**, *25*, 1157–1174.
- [5] Bayly, C. I.; Cieplak, P.; Cornell, W.; Kollman, P. A. *J. Phys. Chem.* **2002**, *97*, 10269–10280.
- [6] Frisch, M. J.; Trucks, G. W.; Schlegel, H. B.; Scuseria, G. E.; Robb, M. A.; Cheeseman, J. R.; Scalmani, G.; Barone, V.; Mennucci, B.; Petersson, G. A.; Nakatsuji, H.; Caricato, M.; Li, X.; Hratchian, H. P.; Izmaylov, A. F.; Bloino, J.; Zheng, G.; Sonnenberg, J. L.; Hada, M.; Ehara, M.; Toyota, K.; Fukuda, R.; Hasegawa, J.; Ishida, M.; Nakajima, T.; Honda, Y.; Kitao, O.; Nakai, H.; Vreven, T.; Montgomery, J. A.; Peralta, J. E.; Ogliaro, F.; Bearpark, M.; Heyd, J. J.; Brothers, E.; Kudin, K. N.; Staroverov, V. N.; Kobayashi, R.; Normand, J.; Raghavachari, K.; Rendell, A.; Burant, J. C.; Iyengar, S. S.; Tomasi, J.; Cossi, M.; Rega, N.; Millam, J. M.; Klene, M.; Knox, J. E.; Cross, J. B.; Bakken, V.; Adamo, C.; Jaramillo, J.; Gomperts, R.; Stratmann, R. E.; Yazyev, O.; Austin, A. J.; Cammi, R.; Pomelli, C.; Ochterski, J. W.; Martin, R. L.; Morokuma, K.; Zakrzewski, V. G.; Voth, G. A.; Salvador, P.; Dannenberg, J. J.; Dapprich, S.; Daniels, A. D.; Farkas; Foresman, J. B.; Ortiz, J. V.; Cioslowski, J.; Fox, D. J. *Gaussian 09, Revision B.01*, Gaussian, Inc., Wallingford CT 2009.

- [7] Jorgensen, W. L.; Chandrasekhar, J.; Madura, J. D.; Impey, R. W.; Klein, M. L. *J. Phys. Chem.* **1983**, *79*, 926–935.
- [8] Andrea, T. A.; Swope, W. C.; Andersen, H. C. *J. Phys. Chem.* **1983**, *79*, 4576–4584.
- [9] Darden, T.; York, D.; Pedersen, L. *J. Phys. Chem.* **1993**, *98*, 10089–10085.
- [10] Alam, I. S.; Neves, A. A.; Witney, T. H.; Boren, J.; Brindle, K. M. *Bioconjugate Chem.* **2010**, *21*, 884–891.
- [11] Oliveira, B. L.; Guo, Z.; Boutureira, O.; Guerreiro, A.; Jiménez-Osés, G.; Bernardes, G. J. L. *Angew. Chem. Int. Ed.* **2016**, *55*, 14683–14687.
- [12] Jin, M.; Smith, C.; Hsieh, H.-Y.; Gibson, D. F.; Tait, J. F. *J. Biol. Chem.* **2004**, *279*, 40351–40357.
- [13] Coxon, K.; Duggan, J.; Cordeiro, M. F.; Moss, S. In *Cancer Cell Culture*; Cree, I. A., Ed.; Humana Press, 2011; Vol. 731; 293–308.
- [14] Junutula, J. R.; Raab, H.; Clark, S.; Bhakta, S.; Leipold, D. D.; Weir, S.; Chen, Y.; Simpson, M.; Tsai, S. P.; Dennis, M. S.; Lu, Y.; Meng, Y. G.; Ng, C.; Yang, J.; Lee, C. C.; Duenas, E.; Gorrell, J.; Katta, V.; Kim, A.; McDorman, K.; Flagella, K.; Venook, R.; Ross, S.; Spencer, S. D.; Lee Wong, W.; Lowman, H. B.; Vandlen, R.; Sliwkowski, M. X.; Scheller, R. H.; Polakis, P.; Mallet, W. *Nat. Biotech.* **2008**, *26*, 925–932.
